# Supplementary material for: Visible light enabled [4+2] annulation reactions for anthracenone-furans from 2,3-dibromonaphthoquinone and phenylbenzofurans
Source: Royal Society of Chemistry journal article supplement (doi:10.1039/d1ra07314a), 2021-01-01
Supplement: d1ra07314a1.pdf [file d1ra07314a1.pdf]

## Supplementary Information

### Visible light enabled [4+2] annulation reactions for anthracenone-furans from 2,3-dibromonaphthoquinone and phenylbenzofurans

Zhimei Mao,<sup>†</sup> Aimin Huang,<sup>†</sup> Lin Ma,<sup>†</sup> Min Zhang<sup>†, \*</sup>

<sup>†</sup> School of Chemistry and Chemical Engineering, Guangxi University, Nanning,  
Guangxi 530004, China

Email: [cheminzhang@gxu.edu.cn](mailto:cheminzhang@gxu.edu.cn); [zhangminnju@hotmail.com](mailto:zhangminnju@hotmail.com)

## Contents

|                                          |    |
|------------------------------------------|----|
| 1. General information .....             | 3  |
| 2. Synthesis of starting materials ..... | 3  |
| 3. Typical procedure.....                | 7  |
| 4. Tables of reaction data .....         | 8  |
| 5. The spectral data .....               | 11 |
| 6. The NMR and HRMS Charts.....          | 29 |
| 7. References.....                       | 83 |

## 1. General information

All the commercially available coumarins are purified before use. All solvents are dried before use. Thin-layer chromatography (TLC) was performed with silica gel GF254 plates. Column chromatography was performed on silica gel (300 ~ 400 mesh) with petroleum ether/ethyl acetate for the gradient elution. All melting points were measured without correction. Nuclear magnetic resonance (NMR) spectra were recorded on a Bruker Avance III HD 600 spectrometer at 600 MHz ( $^1\text{H}$  NMR) and 151 MHz ( $^{13}\text{C}$  NMR) respectively. The chemical shifts are reported relative to  $\text{CHCl}_3$  ( $\delta = 7.26$  for  $^1\text{H}$  NMR and  $\delta = 77.16$  for  $^{13}\text{C}$  NMR). The infrared spectra were recorded on a Nicolet iS 50 FT-IR spectrometer. Mass spectra (ESI-MS) were obtained on an Agilent 1240/6460 LC-MS system. HRMS spectra were obtained on Thermo Fisher HRMS, Q Exactive instrument.

## 2. Synthesis of starting materials

2,3-Dibromoquinones (**1a**, **1d**, **1e**) was synthesized as described<sup>1</sup> in supporting information of ref 1.

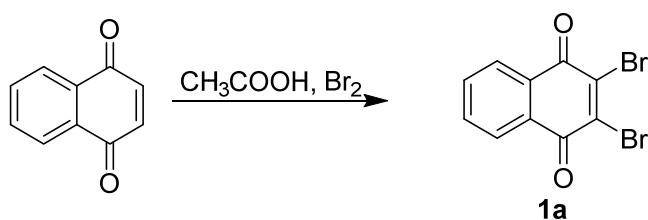

2,3-Dibromonaphthalene-1,4-dione (**1a**)<sup>1</sup>: To a solution of naphthalene-1,4-dione (5.0g, 31.5 mmol) in glacial acetic acid, liquid bromine (3.25 mL, 63 mmol, 2eq) was added dropwise. The resulting solution was stirred at room temperature for 30 min and then heated to 110 °C. After 8 h reaction at this temperature, the mixture was poured into 200 mL ice-water, the precipitate was formed, filtered and washed with water and dried under vacuum. The pure product was gained as yellow solid (9.42g, 94%) with m.p. 216-218 °C.  $^1\text{H}$  NMR (500 MHz,  $\text{CDCl}_3$ )  $\delta$  8.19 (dd,  $J = 5.7, 3.3$  Hz, 2H), 7.79

(dd,  $J = 5.8, 3.3$  Hz, 2H). The spectral data agree with the literature value.

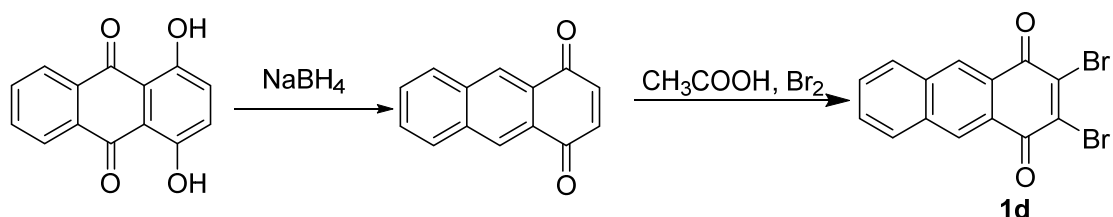

1,4-Antraquinone<sup>2</sup>: Quinizarin (1 g, 4.16 mmol) was dissolved in methanol (20 mL) at 0 °C. Sodium borohydride (0.96g, 25.4 mmol) was added carefully. The reaction was stirred for 90 min at 0°. An aq. solution of hydrochloric acid (6M, 18 mL) was added and the precipitate was filtered off and washed with water to afford 1,4-antraquinone as a brown solid (0.769g, 89%) with m.p. 214–216 °C.  $^1\text{H}$  NMR (500 MHz,  $\text{CDCl}_3$ )  $\delta$  8.60 (s, 2H), 8.10 – 7.98 (m, 2H), 7.73 – 7.64 (m, 2H), 7.06 (s, 2H). The spectral data agree with the literature value.

2,3-Dibromoanthracene-1,4-dione (**1d**) was synthesized as described above. Deep yellow to red solid, m.p. 289-290 °C. (lit<sup>3</sup> 293°C).  $^1\text{H}$  NMR (500 MHz,  $\text{CDCl}_3$ )  $\delta$  8.74 (s, 2H), 8.10 (dd,  $J = 6.1, 3.3$  Hz, 2H), 7.75 (dd,  $J = 6.3, 3.2$  Hz, 2H).

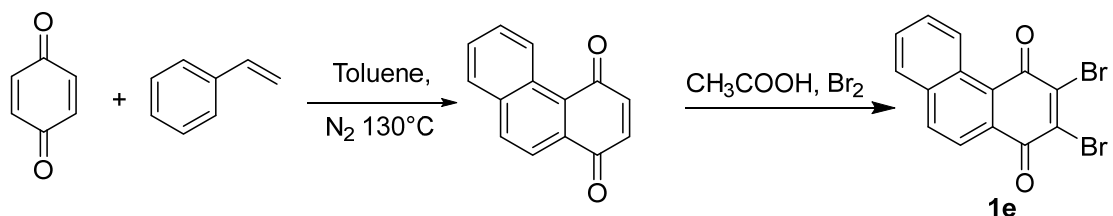

1,4-Phenanthrenedione<sup>4</sup>: In a sealed tube, *p*-benzoquinone (1 g, 9.2 mmol), styrene (1.435 g, 13.8mmol), and toluene (2 ml) were refluxed to 120 °C under  $\text{N}_2$  for 27 h. After cooling to rt, the toluene was stripped, and small amounts of *p*-benzoquinone were sublimed under vacuum from the flask heated to its neck in hot water. The solid residue was flash chromatographed on silica gel using petroleum ether/ $\text{CH}_2\text{Cl}_2$  (3:1) as eluent. After concentration in vacuo, *p*-benzoquinone sublimed from the eluted product (0.815 g, 42%) as an orange solid with m.p. 147-148 °C (lit<sup>4</sup> 146–148 °C).  $^1\text{H}$  NMR (500 MHz,  $\text{CDCl}_3$ )  $\delta$  9.55 (d,  $J = 8.8$  Hz, 1H), 8.20 – 8.15 (m, 2H), 7.90 (d,  $J = 8.1$  Hz, 1H), 7.74 (ddd,  $J = 8.6, 6.8, 1.4$  Hz, 1H), 7.65 (ddd,  $J = 8.0, 6.9, 1.0$  Hz, 1H), 6.98 (d,

$J = 10.1$  Hz, 1H), 6.94 (d,  $J = 10.2$  Hz, 1H). The spectral data agree with the literature value.

2,3-Dibromophenanthrene-1,4-dione (**1e**) was synthesized as **1a**. Yellow solid, m.p. 156-158 °C.  $^1\text{H}$  NMR (500 MHz, Chloroform-*d*)  $\delta$  9.46 (d,  $J = 8.9$  Hz, 1H), 8.25 (d,  $J = 8.5$  Hz, 1H), 8.20 (d,  $J = 8.5$  Hz, 1H), 7.93 (d,  $J = 8.2$  Hz, 1H), 7.78 (ddd,  $J = 8.6, 6.9, 1.3$  Hz, 1H), 7.72 – 7.67 (m, 1H).

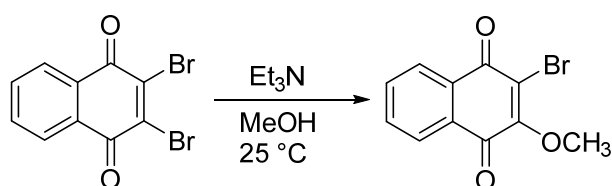

2-Bromo-3-methoxynaphthoquinone (**1c**) was synthesized as similar procedure for 2-chloro-3-methoxynaphthoquinone<sup>5</sup>: 2,3-dibromo quinone (0.315 g, 1.00 mmol) and  $\text{Et}_3\text{N}$  (0.15 mL, 1.10 mmol) were dissolved in  $\text{MeOH}$  (10 mL) at  $25\text{ }^\circ\text{C}$ . After 5 h, the solid was filtered off and washed with cold  $\text{H}_2\text{O}$  (20 mL) to afford 2-Bromo-3-methoxynaphthoquinone (**1c**) (195 mg, 73%) as a green solid with m.p. 163-165 °C.  $^1\text{H}$  NMR (500 MHz,  $\text{CDCl}_3$ )  $\delta$  8.17 – 8.13 (m, 1H), 8.11 – 8.06 (m, 1H), 7.76 – 7.72 (m, 2H), 4.31 (s, 3H).

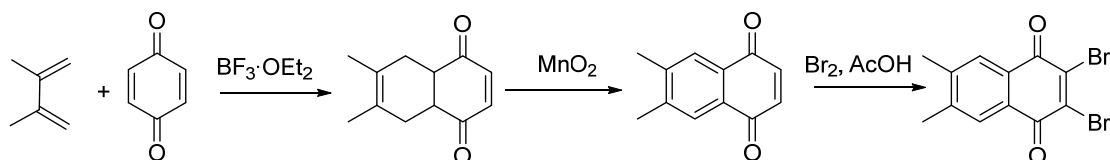

6,7-Dimethyl-4a,5,8,8a-tetrahydronaphthalene-1,4-dione<sup>6</sup>: To a stirred solution of 1,4-benzoquinone (0.2 g, 1.85 mmol) and  $\text{BF}_3 \cdot \text{OEt}_2$  (0.02 mL, 0.185 mmol) in toluene was added 2,3-dimethyl-1,3-butadiene (0.252 mL, 2.22 mmol) dropwise at  $-16\text{ }^\circ\text{C}$  over 10 min. After addition completion the reaction was allowed to warm to rt over 80 min. Upon completion the mixture was washed twice with brine and the organics dried over  $\text{Na}_2\text{SO}_4$ , filtered and solvent condensed under vacuum. The product was recrystallized from toluene to yield yellow crystals.

6,7-Dimethylnaphthalene-1,4-dione<sup>6</sup>: To a stirred solution of 6,7-Dimethyl-4a,5,8,8a-tetrahydronaphthalene-1,4-dione (0.266 g, 1.4 mmol) in toluene (10mL) was added portion wise activated MnO<sub>2</sub>(1.3 g, 15.4 mmol) and refluxed for 2 h. The reaction mixture was cooled and filtered through Celite by washing with EtOH. The solvent was condensed and crude material purified by column chromatography to yield a yellow solid (0.172 g, 66%).

2,3-dibromo-6,7-dimethylnaphthalene-1,4-dione was synthesized as **1a**. Yellow solid, m.p.235-236 °C.

Phenylbenzofurans were synthesized as described in the literature<sup>7</sup> we previously reported.

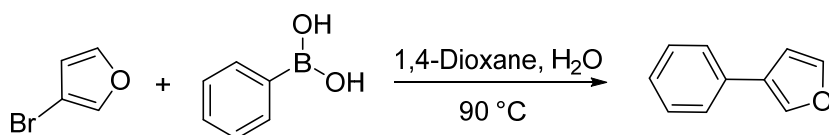

3-Phenylfuran was synthesized as a literature procedure<sup>8</sup> (PCT Int. Appl., 2012119046): To a solution of phenylboronic acid (0.3 g, 2.46 mmol) in dioxane (3.0 mL) and water (0.06 mL) was added 3-bromofuran (0.326 g, 2.25 mmol), H<sub>3</sub>PO<sub>4</sub> (0.86 g, 4.05 mmol) and Pd(PPh<sub>3</sub>)<sub>4</sub> (0.012g, 0.01 mmol) with stirring for 4h at 90 °C in an oil bath maintained with an inert atmosphere of nitrogen. The reaction mixture was concentrated under reduced pressure to give the residue, which was purified by silica gel column chromatography eluting with 1% ethyl acetate in petroleum ether to give 3-phenylfuran as a white solid (0.261, 82%) with m.p. 54-56 °C. <sup>1</sup>H NMR (500 MHz, CDCl<sub>3</sub>) δ 7.75 – 7.73 (m, 1H), 7.51 (t, *J* = 1.6 Hz, 1H), 7.49 (ddd, *J* = 4.1, 2.6, 1.3 Hz, 2H), 7.41 – 7.37 (m, 2H), 7.30 – 7.26 (m, 1H), 6.72 (dd, *J* = 1.8, 0.9 Hz, 1H). The spectral data agree with the literature value.

### 3. Typical procedure

In a 12 mL glass vial, 2,3-dibromo-1,4-naphthoquinone (31.5mg, 0.1 mmol), 3-phenylbenzofuran (25.2 mg, 0.13 mmol) and 4CzIPN (3.9 mg, 0.005 mmol) in 10 mL distilled benzene was dissolved. The solution was then ultrasonicated, purged with N<sub>2</sub> for 10 minutes and sealed. The solution was then irradiated by 50 W blue LED until TLC showed the complete consumption of 2,3-dibromo-1,4-naphthoquinone. The solvent was removed in vacuum and the residue was put on silica gel chromatography with PE/DCM as eluent. The product is yielded as a red solid (32.1 mg, 92%).

## 4. Tables of reaction data

**Table S1** Optimizing conditions for **3a**.<sup>a</sup>

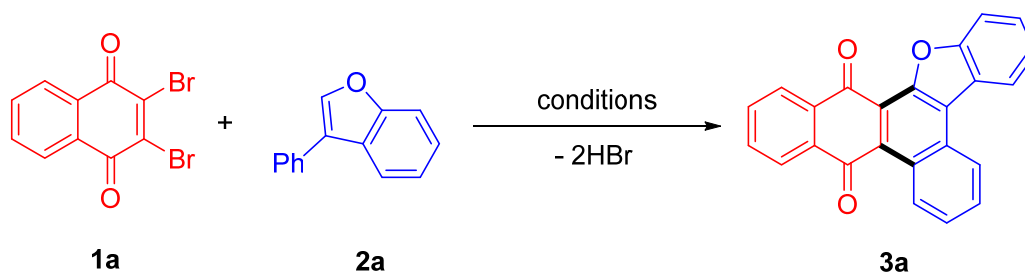

| Entry | VLPC, 5%         | Solvent          | Light Source     | Time, h | Yield, % <sup>b</sup> |
|-------|------------------|------------------|------------------|---------|-----------------------|
| 1     | No PC            | Benzene          | 24W Blue led     | 168     | 51                    |
| 2     | Butanedione, 30% | Benzene          | 24W Blue led     | 75      | 54                    |
| 3     | Rose Bengal, 2%  | Benzene          | 24W Blue led     | 65      | 60                    |
| 4     | TXO, 2%          | Benzene          | 24W Blue led     | 56      | 69                    |
| 5     | TXO, 5%          | Benzene          | 24W Blue led     | 53      | 75                    |
| 6     | 4CzIPN, 2%       | Benzene          | 24W Blue led     | 51      | 79                    |
| 7     | 4CzIPN           | Benzene          | 24W Blue led     | 49      | 88                    |
| 8     | 4CzIPN           | DCE              | 24W Blue led     | 56      | 52                    |
| 9     | 4CzIPN           | 1,4-Dioxane      | 24W Blue led     | 39      | 57                    |
| 10    | 4CzIPN           | MeCN             | 24W Blue led     | 48      | 19                    |
| 11    | 4CzIPN           | Benzene(0.02 M)  | 24W Blue led     | 76      | 67(1) <sup>c</sup>    |
| 12    | 4CzIPN           | Benzene          | 24W Blue led     | 38      | 87(2) <sup>d</sup>    |
| 13    | 4CzIPN           | Benzene          | 470-475 nm 3W    | 118     | 70                    |
| 14    | 4CzIPN           | Benzene          | 460-465 nm 3W    | 79      | 79                    |
| 16    | 4CzIPN           | Benzene          | 450-455 nm 3W    | 74      | 85                    |
| 17    | 4CzIPN           | Benzene          | 50W Blue Led     | 10      | 92                    |
| 18    | 4CzIPN           | Benzene          | Light Off        | 126     | NR                    |
| 19    | 4CzIPN           | Benzene          | No Light, reflux | 156     | NR                    |
| 20    | 4CzIPN           | Benzene (0.02 M) | 50W Blue Led     | 23      | 82                    |
| 21    | TXO              | Benzene          | 50W Blue Led     | 13      | 80                    |
| 22    | 4CzIPN (2%)      | Benzene          | 50W Blue Led     | 12      | 84                    |

<sup>a</sup>. Reagents and conditions: 0.1 mmol **1a** (31.5 mg), 0.13 mmol **2a** (25.2 mg) and 0.005 mmol VLPC in 10 mL distilled benzene was ultra-sonicated and purged with N<sub>2</sub> for 10 minutes and then irradiated under blue LED. TXO: Thioxanthen-9-one. 4CzIPN: 2,4,5,6-tetrakis(carbazol-9-yl)-1,3-dicyanobenzene <sup>b</sup>. Isolated yield. <sup>c</sup>. Average of two parallel runs. <sup>d</sup>. Pyridine (2.2 eq) was added.



**Table S2** Lewis acid promoted one-pot reaction for **5a**.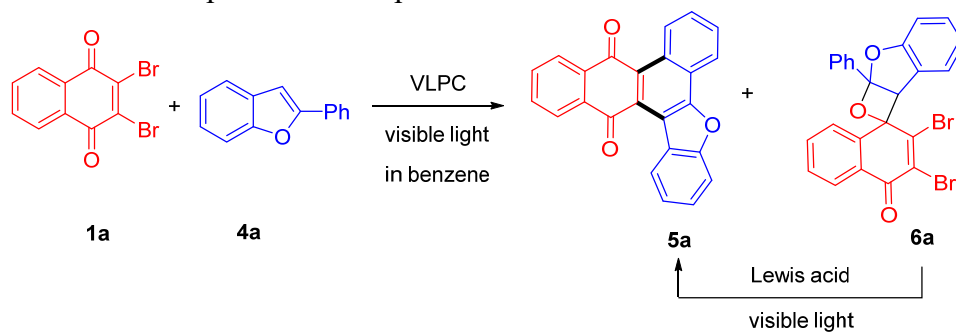

| Entry | PC, 5% | Light Source  | Additive                             | Time, h | Yield, % <sup>b</sup> |
|-------|--------|---------------|--------------------------------------|---------|-----------------------|
| 1     | 4CzIPN | 24 W Blue led | N/A                                  | 29      | 46 <sup>a</sup>       |
| 2     | 4CzIPN | 24 W Blue led | N/A                                  | 101     | 54                    |
| 3     | 4CzIPN | 50 W Blue led | /                                    | 13      | 54                    |
| 4     | 4CzIPN | 50 W Blue led | SnCl <sub>4</sub>                    | 8       | 69                    |
| 5     | 4CzIPN | 50 W Blue led | FeCl <sub>3</sub> ·6H <sub>2</sub> O | 28      | 63                    |
| 6     | 4CzIPN | 50 W Blue led | FeCl <sub>2</sub> ·4H <sub>2</sub> O | 25      | 64                    |
| 7     | 4CzIPN | 50 W Blue led | BF <sub>3</sub> ·Et <sub>2</sub> O   | 16      | 55                    |
| 8     | 4CzIPN | 50 W Blue led | Ni(OTf) <sub>2</sub>                 | 10      | 57                    |
| 9     | 4CzIPN | 50 W Blue led | AgOTf                                | 11      | 59                    |

<sup>a</sup>. Reagents and conditions: 0.1 mmol **1a** (31.5 mg), 0.13 mmol **2b** (25.2 mg), 0.005 mmol 4CzIPN and 0.01 mmol LA in 10 mL distilled benzene was ultrasonicated and purged with N<sub>2</sub> for 10 minutes and then irradiated under blue LED (24W\*2). <sup>b</sup>. Isolated yield. <sup>c</sup>. Oxetane **6a** was obtained in 17% yield.

**Table S3** Competitive absorption of annulated products to 4CzIPN.

| Product   | Time, h | Yield, % | $\lambda_{\max}$ , nm | $\epsilon$ , mol <sup>-1</sup> .L.cm <sup>-1</sup> |
|-----------|---------|----------|-----------------------|----------------------------------------------------|
| <b>3a</b> | 10      | 92       | 446                   | 9360                                               |
| <b>3k</b> | 15      | 92       | 464                   | 7760                                               |
| <b>3u</b> | 22      | 71       | 462                   | 8160                                               |
| <b>3s</b> | 22      | 44       | 450                   | 11300                                              |
| <b>3t</b> | 24      | 53       | 409, 537              | 24000, 14200                                       |
| <b>3l</b> | 38      | 50       | 478                   | 10000                                              |

When the UV absorption of annulated product is near 4CzIPN (471 nm) with a large extinction coefficient, the yield is reduced with a longer reaction time needed.

## 5. The spectral data

All the known compounds' spectral data ( $^1\text{H}$  NMR,  $^{13}\text{C}$  NMR, IR, MS) agree with the reported references. The new compounds were characterized by  $^1\text{H}$  NMR,  $^{13}\text{C}$  NMR, IR and HRMS except no clear  $^{13}\text{C}$  NMR signals for **3i**, **3j**, **5d**, **5e**, **7a** and **7b** could be acquired for poor solubility in organic solvent.

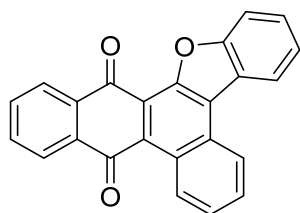

### 3a

Tetrapheno[6,5-*b*]benzofuran-5,15-dione

Yellow solid, m.p. 221-223 °C (DCM/PE =4/1).

$^1\text{H}$  NMR (500 MHz,  $\text{CDCl}_3$ )  $\delta$  9.67 (d,  $J = 8.8$  Hz, 1H), 8.60 (d,  $J = 8.2$  Hz, 1H), 8.38 (d,  $J = 7.9$  Hz, 1H), 8.30 – 8.22 (m, 2H), 7.87 (d,  $J = 8.3$  Hz, 1H), 7.83 – 7.74 (m, 3H), 7.71 – 7.66 (m, 1H), 7.60 (t,  $J = 7.8$  Hz, 1H), 7.49 (t,  $J = 7.6$  Hz, 1H).

$^{13}\text{C}$  NMR (126 MHz,  $\text{CDCl}_3$ )  $\delta$  186.0, 183.1, 158.3, 150.1, 134.9, 134.2, 133.7, 132.8, 132.1, 130.1, 129.7, 129.1, 128.5, 128.1, 127.8, 127.2, 126.4, 125.4, 124.1, 123.6, 123.0, 122.9, 121.8, 113.1.

IR(KBr)  $\nu_{\text{max}}$ : 3064, 3030, 1673, 1654, 1572, 1451, 1341, 1292, 1239, 1213, 752, 741, 677  $\text{cm}^{-1}$ .

HRMS: (ESI) calcd for  $\text{C}_{24}\text{H}_{13}\text{O}_3^+$   $[\text{M}+\text{H}]^+$  349.08592; found 349.08572.

UV(in PhH)  $\lambda_{\text{max}} = 446$  nm,  $\epsilon_{\text{max}} = 9360$   $\text{mol}^{-1}\cdot\text{L}\cdot\text{cm}^{-1}$ .

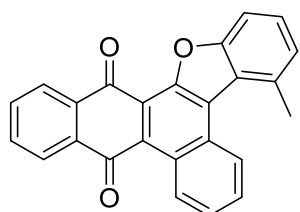

### 3b

10-Methyltetrapheno[6,5-*b*]benzofuran-5,15-dione

Yellow solid, m.p. 218-220 °C (DCM/PE =3/1).

$^1\text{H}$  NMR (500 MHz,  $\text{CDCl}_3$ )  $\delta$  9.67 (d,  $J = 8.5$  Hz, 1H), 8.99 (d,  $J = 8.2$  Hz, 1H), 8.31 – 8.27 (m, 2H), 7.84 – 7.79 (m, 2H), 7.78 – 7.69 (m, 3H), 7.50 (t,  $J = 7.8$  Hz, 1H), 7.29 (d,  $J = 7.4$  Hz, 1H), 3.15 (s, 3H).

$^{13}\text{C}$  NMR (126 MHz,  $\text{CDCl}_3$ )  $\delta$  185.9, 183.2, 159.0, 150.4, 135.0, 134.2, 133.7, 133.3, 133.0, 131.8, 130.0, 129.7, 128.7, 128.6, 128.2(2C), 127.6, 127.4, 127.2, 126.5, 126.3, 122.8, 121.4, 110.8, 26.2.

IR(KBr)  $\nu_{\max}$ : 3126, 3077, 3054, 2958, 2858, 1677, 1659, 1613, 1593, 1442, 1336, 1287, 1258, 1238, 1212, 1191, 1129, 1057, 1025, 974, 771, 753, 697, 678  $\text{cm}^{-1}$ .  
HRMS: (ESI) calcd for  $\text{C}_{25}\text{H}_{15}\text{O}_3^+$   $[\text{M}+\text{H}]^+$  363.10157; found 363.10110.  
UV(in PhH)  $\lambda_{\max}$  = 458 nm,  $\epsilon_{\max}$  = 11760  $\text{mol}^{-1}\cdot\text{L}\cdot\text{cm}^{-1}$ .

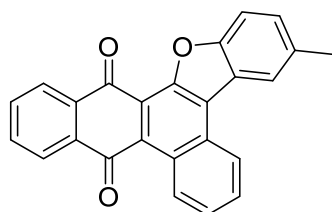

### 3c

11-Methyltetrapheno[6,5-*b*]benzofuran-5,15-dione

Yellow solid, m.p. 245-247 °C (DCM/PE =3/1).

$^1\text{H}$  NMR (500 MHz,  $\text{CDCl}_3$ )  $\delta$  9.51 (d,  $J$  = 8.8 Hz, 1H), 8.36 (d,  $J$  = 8.2 Hz, 1H), 8.19 (ddd,  $J$  = 6.3, 2.8, 1.3 Hz, 2H), 7.93 (s, 1H), 7.78 – 7.72 (m, 2H), 7.62 (dd,  $J$  = 7.6, 5.2 Hz, 2H), 7.55 – 7.50 (m, 1H), 7.28 (d,  $J$  = 8.4 Hz, 1H), 2.51 (s, 3H).

$^{13}\text{C}$  NMR (126 MHz,  $\text{CDCl}_3$ )  $\delta$  185.7, 182.8, 156.6, 150.0, 134.8, 134.0, 133.5(2C), 132.7, 131.8, 129.9, 129.7, 129.4, 128.5, 127.8, 127.6, 127.1, 126.3, 125.1, 123.4, 122.74, 122.71, 121.5, 112.4, 21.7.

IR(KBr)  $\nu_{\max}$ : 3075, 3005, 2958, 2923, 2856, 1671, 1654, 1618, 1571, 1458, 1384, 1330, 1289, 1246, 1080, 1058, 1026, 968, 751, 725  $\text{cm}^{-1}$ .

HRMS: (ESI) calcd for  $\text{C}_{25}\text{H}_{15}\text{O}_3^+$   $[\text{M}+\text{H}]^+$  363.10157; found 363.10117.

UV(in PhH)  $\lambda_{\max}$  = 450 nm,  $\epsilon_{\max}$  = 10960  $\text{mol}^{-1}\cdot\text{L}\cdot\text{cm}^{-1}$ .

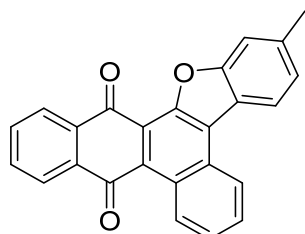

### 3d

12-Methyltetrapheno[6,5-*b*]benzofuran-5,15-dione

Yellow solid, m.p. 241-243 °C (DCM/PE =4/1).

$^1\text{H}$  NMR (500 MHz,  $\text{CDCl}_3$ )  $\delta$  9.75 (d,  $J$  = 8.7 Hz, 1H), 8.66 (d,  $J$  = 8.0 Hz, 1H), 8.32 – 8.27 (m, 3H), 7.85 – 7.77 (m, 3H), 7.77 – 7.72 (m, 1H), 7.69 (s, 1H), 7.34 (d,  $J$  = 7.8 Hz, 1H), 2.60 (s, 3H).

$^{13}\text{C}$  NMR (126 MHz,  $\text{CDCl}_3$ )  $\delta$  186.1, 183.4, 159.0, 150.1, 139.6, 135.1, 134.2, 133.6, 132.9, 132.0, 130.2, 129.6, 128.6, 128.1, 128.0, 127.2, 126.4, 125.8, 125.7, 123.8, 122.6, 122.0, 120.6, 113.3, 22.3.

IR(KBr)  $\nu_{\max}$ : 3124, 3065, 3036, 2921, 2854, 1674, 1654, 1626, 1594, 1569, 1440, 1341, 1316, 1292, 1250, 1228, 1212, 1170, 1114, 1058, 1027, 973, 752  $\text{cm}^{-1}$ .

HRMS: (ESI) calcd for  $\text{C}_{25}\text{H}_{15}\text{O}_3^+$   $[\text{M}+\text{H}]^+$  363.10157; found 363.10126.

UV(in PhH)  $\lambda_{\max}$  = 456 nm,  $\epsilon_{\max}$  = 10480  $\text{mol}^{-1}\cdot\text{L}\cdot\text{cm}^{-1}$ .

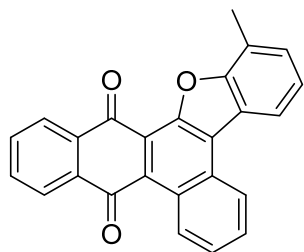

### 3e

13-Methyltetrapheno[6,5-*b*]benzofuran-5,15-dione

Yellow solid, m.p. 240-242 °C (DCM/PE =4/1).

<sup>1</sup>H NMR (500 MHz, CDCl<sub>3</sub>) δ 9.65 (d, *J* = 8.8 Hz, 1H), 8.54 (d, *J* = 8.1 Hz, 1H), 8.28 – 8.22 (m, 2H), 8.13 (dt, *J* = 7.5, 3.8 Hz, 1H), 7.81 – 7.75 (m, 2H), 7.71 (dd, *J* = 11.0, 4.0 Hz, 1H), 7.65 (ddd, *J* = 8.2, 6.8, 1.2 Hz, 1H), 7.37 – 7.32 (m, 2H), 2.74 (s, 3H).

<sup>13</sup>C NMR (126 MHz, CDCl<sub>3</sub>) δ 185.9, 182.9, 157.3, 149.9, 134.9, 134.0, 133.6, 132.8, 132.1, 130.1, 129.5, 129.4, 128.7, 127.9, 127.8, 127.2, 126.3, 125.8, 124.0, 123.6, 123.2, 122.3, 121.8, 120.4, 15.5.

IR(KBr) ν<sub>max</sub>: 3061, 2958, 2923, 2854, 1655, 1571, 1341, 1293, 1272, 1181, 1059, 968, 786, 748, 737, 729, 697, 679 cm<sup>-1</sup>.

HRMS: (ESI) calcd for C<sub>25</sub>H<sub>15</sub>O<sub>3</sub><sup>+</sup> [M+H]<sup>+</sup> 363.10157; found 363.10114.

UV(in PhH) λ<sub>max</sub> = 450 nm, ε<sub>max</sub> = 12080 mol<sup>-1</sup>.L.cm<sup>-1</sup>.

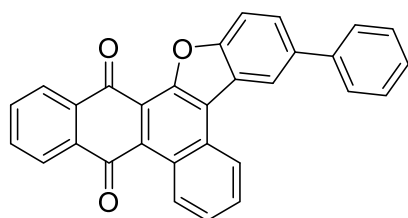

### 3f

11-Phenyltetrapheno[6,5-*b*]benzofuran-5,15-dione

Yellow solid, m.p. 293-295 °C (DCM/PE =5/1).

<sup>1</sup>H NMR (500 MHz, CDCl<sub>3</sub>) δ 9.70 (d, *J* = 8.8 Hz, 1H), 8.68 (d, *J* = 8.2 Hz, 1H), 8.52 (s, 1H), 8.27 (dd, *J* = 8.2, 6.4 Hz, 2H), 7.91 (d, *J* = 8.6 Hz, 1H), 7.83 – 7.76 (m, 4H), 7.71 (dd, *J* = 12.8, 7.4 Hz, 3H), 7.54 (t, *J* = 7.6 Hz, 2H), 7.44 (t, *J* = 7.4 Hz, 1H).

<sup>13</sup>C NMR (126 MHz, CDCl<sub>3</sub>) δ 186.0, 183.1, 157.9, 150.6, 141.2, 137.9, 135.0, 134.2, 133.7, 132.8, 132.2, 130.2, 129.9, 129.3, 129.1(2C), 128.22, 128.18, 127.9, 127.8(2C), 127.6, 127.2, 126.5, 125.4, 123.7, 123.5, 121.9, 121.5, 113.2.

IR(KBr) ν<sub>max</sub>: 3058, 3027, 1671, 1655, 1648, 1637, 1570, 1460, 1384, 1330, 1304, 1294, 1271, 1162, 1140, 1115, 1058, 1036, 970, 747, 728, 692 cm<sup>-1</sup>.

HRMS: (ESI) calcd for C<sub>30</sub>H<sub>17</sub>O<sub>3</sub><sup>+</sup> [M+H]<sup>+</sup> 425.11722; found 425.11670.

UV(in PhH) λ<sub>max</sub> = 446 nm, ε<sub>max</sub> = 11280 mol<sup>-1</sup>.L.cm<sup>-1</sup>.

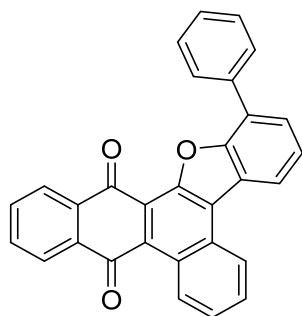

### 3g

13-Phenyltetrapheno[6,5-*b*]benzofuran-5,15-dione

Yellow solid, m.p. 270-272 °C (DCM/PE =6/1).

<sup>1</sup>H NMR (500 MHz, CDCl<sub>3</sub>) δ 9.78 (d, *J* = 8.7 Hz, 1H), 8.75 (d, *J* = 8.1 Hz, 1H), 8.44 (d, *J* = 7.7 Hz, 1H), 8.33 – 8.21 (m, 4H), 7.86 (t, *J* = 7.6 Hz, 2H), 7.83 – 7.74 (m, 3H), 7.69 (t, *J* = 7.8 Hz, 2H), 7.62 (t, *J* = 7.7 Hz, 1H), 7.52 (t, *J* = 7.4 Hz, 1H).

<sup>13</sup>C NMR (126 MHz, CDCl<sub>3</sub>) δ 186.1, 182.7, 155.6, 150.1, 135.6, 135.0, 134.1, 133.6, 132.8, 132.2, 130.3, 129.8, 129.2, 129.1(2C), 129.0(2C), 128.5, 128.1, 128.0, 127.7, 127.2, 126.6, 126.5, 125.3, 124.7, 123.9, 123.7, 122.01, 121.99.

IR(KBr) ν<sub>max</sub>: 3059, 3030, 1674, 1657, 1594, 1574, 1442, 1404, 1346, 1336, 1294, 1246, 1213, 1152, 1115, 1059, 1025, 973, 752, 738, 690, 681 cm<sup>-1</sup>.

HRMS: (ESI) calcd for C<sub>30</sub>H<sub>17</sub>O<sub>3</sub><sup>+</sup> [M+H]<sup>+</sup> 425.11722; found 425.11673.

UV(in PhH) λ<sub>max</sub> = 452 nm, ε<sub>max</sub> = 7760 mol<sup>-1</sup>.L.cm<sup>-1</sup>.

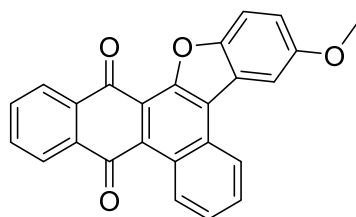

### 3h

11-Methoxytetrapheno[6,5-*b*]benzofuran-5,15-dione

Yellow solid, m.p. 242-244 °C (DCM/PE =3/1).

<sup>1</sup>H NMR (500 MHz, CDCl<sub>3</sub>) δ 9.67 (d, *J* = 8.8 Hz, 1H), 8.51 (d, *J* = 8.2 Hz, 1H), 8.29 – 8.24 (m, 2H), 7.84 – 7.73 (m, 5H), 7.71 – 7.66 (m, 1H), 7.18 (dd, *J* = 9.0, 2.3 Hz, 1H), 3.99 (s, 3H).

<sup>13</sup>C NMR (126 MHz, CDCl<sub>3</sub>) δ 186.0, 183.1, 156.7, 153.3, 150.8, 135.0, 134.2, 133.7, 132.8, 132.1, 130.2, 129.7, 129.0, 127.9, 127.7, 127.2, 126.4, 125.4, 123.4, 123.3, 121.9, 116.9, 113.5, 105.7, 56.3.

IR(KBr) ν<sub>max</sub>: 3110, 3077, 3001, 2962, 2932, 1678, 1655, 1593, 1571, 1475, 1467, 1458, 1330, 1297, 1236, 1188, 1172, 1061, 970, 832, 749, 726 cm<sup>-1</sup>.

HRMS: (ESI) calcd for C<sub>25</sub>H<sub>15</sub>O<sub>4</sub><sup>+</sup> [M+H]<sup>+</sup> 379.09648; found 379.09616.

UV(in PhH) λ<sub>max</sub> = 448 nm, ε<sub>max</sub> = 10480 mol<sup>-1</sup>.L.cm<sup>-1</sup>.

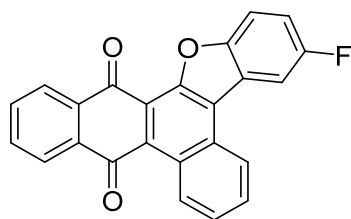

### 3i

11-Fluorotetrapheno[6,5-*b*]benzofuran-5,15-dione

Yellow solid, m.p. >302 °C (DCM/PE =6/1).

$^1\text{H NMR}$  (500 MHz,  $\text{CDCl}_3$ )  $\delta$  9.78 (d,  $J = 8.8$  Hz, 1H), 8.61 (d,  $J = 8.2$  Hz, 1H), 8.32 (d,  $J = 7.0$  Hz, 2H), 8.14 (d,  $J = 8.6$  Hz, 1H), 7.89 (dd,  $J = 13.3, 5.2$  Hz, 2H), 7.82 (td,  $J = 14.2, 7.1$  Hz, 3H), 7.42 – 7.35 (m, 1H).

This compound is difficult to solute and no clear  $^{13}\text{CNMR}$  signal in solvent could be obtained.

$^{19}\text{F NMR}$  (471 MHz,  $\text{CDCl}_3$ )  $\delta$  -118.13 – -118.25 (m).

IR(KBr)  $\nu_{\text{max}}$ : 3093, 3063, 1673, 1654, 1593, 1571, 1470, 1458, 1333, 1301, 1293, 1231, 1174, 1156, 1127, 1057, 971, 839, 798, 750, 727  $\text{cm}^{-1}$ .

HRMS: (ESI) calcd for  $\text{C}_{24}\text{H}_{12}\text{FO}_3^+$   $[\text{M}+\text{H}]^+$  367.07650; found 367.07648.

UV(in PhH)  $\lambda_{\text{max}} = 442$  nm,  $\epsilon_{\text{max}} = 9120$   $\text{mol}^{-1}\cdot\text{L}\cdot\text{cm}^{-1}$ .

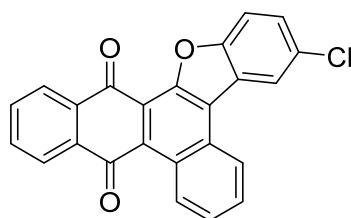

### 3j

11-Chlorotetrapheno[6,5-*b*]benzofuran-5,15-dione

Yellow solid, m.p. >302 °C (DCM/PE =6/1).

$^1\text{H NMR}$  (500 MHz,  $\text{CDCl}_3$ )  $\delta$  9.76 (d,  $J = 8.8$  Hz, 1H), 8.62 (d,  $J = 8.2$  Hz, 1H), 8.43 (s, 1H), 8.31 (d,  $J = 7.1$  Hz, 2H), 7.95 – 7.74 (m, 5H), 7.60 (d,  $J = 8.3$  Hz, 1H).

This compound is difficult to solute and no clear  $^{13}\text{CNMR}$  signal in solvent could be obtained.

IR(KBr)  $\nu_{\text{max}}$ : 3106, 3065, 1672, 1655, 1571, 1456, 1333, 1294, 1241, 1145, 1115, 1057, 817, 753  $\text{cm}^{-1}$ .

HRMS: (ESI) calcd for  $\text{C}_{24}\text{H}_{12}\text{ClO}_3^+$   $[\text{M}+\text{H}]^+$  383.04695; found 383.04648.

UV(in PhH)  $\lambda_{\text{max}} = 444$  nm,  $\epsilon_{\text{max}} = 8960$   $\text{mol}^{-1}\cdot\text{L}\cdot\text{cm}^{-1}$ .

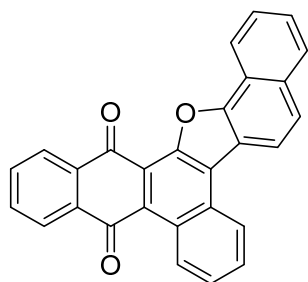

### 3k

Naphtho[1,2-*b*]tetrapheno[5,6-*d*]furan-11,16-dione

Red solid, m.p. 274-276 °C (DCM/PE=6/1).

<sup>1</sup>H NMR (500 MHz, CDCl<sub>3</sub>) δ 9.70 (d, *J* = 8.8 Hz, 1H), 8.70 – 8.63 (m, 2H), 8.31 (d, *J* = 8.7 Hz, 1H), 8.26 (t, *J* = 8.3 Hz, 2H), 7.95 (d, *J* = 8.0 Hz, 1H), 7.83 – 7.76 (m, 3H), 7.74 (d, *J* = 7.7 Hz, 1H), 7.70 (d, *J* = 7.7 Hz, 1H), 7.67 (d, *J* = 8.4 Hz, 1H), 7.62 (t, *J* = 7.4 Hz, 1H).

<sup>13</sup>C NMR (126 MHz, CDCl<sub>3</sub>) δ 186.0, 183.2, 155.3, 150.9, 149.5, 135.1, 134.2, 133.6, 133.2, 132.8, 132.6, 132.0, 130.2, 129.5, 128.4, 128.21, 128.19, 127.6, 127.3, 127.2, 126.5, 126.3, 124.9, 123.9, 122.0, 121.4, 119.8, 118.4.

IR(KBr)  $\nu_{\max}$ : 3114, 3065, 3032, 1671, 1651, 1577, 1569, 1336, 1292, 1245, 1214, 1058, 804, 752, 737, 726 cm<sup>-1</sup>.

HRMS: (ESI) calcd for C<sub>28</sub>H<sub>15</sub>O<sub>3</sub><sup>+</sup> [M+H]<sup>+</sup> 399.10157; found 399.10132.

UV(in PhH)  $\lambda_{\max}$  = 464 nm,  $\epsilon_{\max}$  = 7760 mol<sup>-1</sup>.L.cm<sup>-1</sup>.

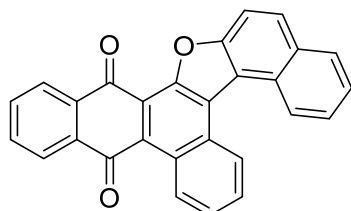

### 3l

Naphtho[2,1-*b*]tetrapheno[5,6-*d*]furan-11,16-dione

Dark red solid, m.p. 268-270 °C (DCM/PE=5/1).

<sup>1</sup>H NMR (500 MHz, CDCl<sub>3</sub>) δ 9.69 (d, *J* = 8.5 Hz, 1H), 9.08 (d, *J* = 8.1 Hz, 1H), 8.98 (d, *J* = 8.4 Hz, 1H), 8.30 (dd, *J* = 5.7, 3.2 Hz, 2H), 8.06 (dd, *J* = 8.3, 4.2 Hz, 2H), 7.99 (d, *J* = 8.9 Hz, 1H), 7.80 (tdd, *J* = 7.1, 5.7, 3.9 Hz, 4H), 7.76 – 7.71 (m, 1H), 7.60 (t, *J* = 7.5 Hz, 1H).

<sup>13</sup>C NMR (126 MHz, CDCl<sub>3</sub>) δ 185.7, 183.4, 158.1, 150.0, 135.0, 134.3, 133.7, 133.0, 131.6, 131.5, 131.4, 130.2, 129.9, 129.0, 128.5, 128.5, 128.4, 128.2, 127.6, 127.2, 127.1, 126.5, 125.6, 125.4, 125.3, 121.5, 117.7, 113.3.

IR(KBr)  $\nu_{\max}$ : 3089, 3054, 1671, 1649, 1585, 1567, 1349, 1320, 1304, 1293, 1253, 1060, 999, 973, 801, 758, 736 cm<sup>-1</sup>.

HRMS: (ESI) calcd for C<sub>28</sub>H<sub>15</sub>O<sub>3</sub><sup>+</sup> [M+H]<sup>+</sup> 399.10157; found 399.10117.

UV(in PhH)  $\lambda_{\max}$  = 478 nm,  $\epsilon_{\max}$  = 10000 mol<sup>-1</sup>.L.cm<sup>-1</sup>.



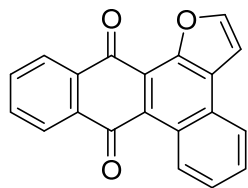

### 3m

tetrapheno[6,5-*b*]furan-8,13-dione

Yellow solid, m.p. 250-252 °C (DCM/PE =3/1).

<sup>1</sup>H NMR (500 MHz, CDCl<sub>3</sub>) δ 9.74 – 9.69 (m, 1H), 8.31 – 8.24 (m, 2H), 8.19 – 8.15 (m, 1H), 8.14 (d, *J* = 2.1 Hz, 1H), 7.80 (td, *J* = 7.5, 1.7 Hz, 1H), 7.77 (td, *J* = 7.1, 1.4 Hz, 1H), 7.75 – 7.70 (m, 2H), 7.35 (d, *J* = 2.0 Hz, 1H).

<sup>13</sup>C NMR (126 MHz, CDCl<sub>3</sub>) δ 186.2, 183.5, 150.0, 148.1, 135.0, 134.3, 133.6, 132.6, 131.3, 130.8, 130.0, 129.2, 128.4, 128.0, 127.2, 127.1, 126.4, 123.9, 122.2, 105.7.

IR(KBr) ν<sub>max</sub>: 3167, 3140, 3118, 3067, 1671, 1655, 1579, 1511, 1443, 1345, 1328, 1295, 1238, 1180, 1050, 961, 753, 728 cm<sup>-1</sup>.

HRMS: (ESI) calcd for C<sub>20</sub>H<sub>11</sub>O<sub>3</sub><sup>+</sup> [M+H]<sup>+</sup> 299.07027; found 299.07010.

UV(in PhH) λ<sub>max</sub> = 434 nm, ε<sub>max</sub> = 6900 mol<sup>-1</sup>.L.cm<sup>-1</sup>.

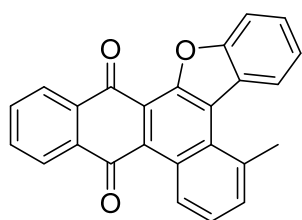

### 3n

9-Methyltetrapheno[6,5-*b*]benzofuran-5,15-dione

Yellow solid, m.p. 214-216 °C (DCM/PE =3/1).

<sup>1</sup>H NMR (500 MHz, CDCl<sub>3</sub>) δ 9.47 – 9.42 (m, 1H), 8.30 – 8.22 (m, 3H), 7.85 (d, *J* = 8.3 Hz, 1H), 7.81 – 7.75 (m, 2H), 7.60 (dd, *J* = 6.7, 3.5 Hz, 2H), 7.58 – 7.53 (m, 1H), 7.43 – 7.39 (m, 1H), 3.06 (s, 3H).

<sup>13</sup>C NMR (126 MHz, CDCl<sub>3</sub>) δ 186.1, 182.9, 158.2, 151.2, 135.1, 134.2, 133.6, 133.3, 132.9, 132.5, 132.3, 130.5, 129.1, 128.0, 127.6, 127.4, 127.2, 126.4, 126.2, 125.3, 123.7, 123.1, 121.3, 112.8, 24.9.

IR(KBr) ν<sub>max</sub>: 3134, 3059, 2962, 2928, 1670, 1571, 1450, 1336, 1320, 1277, 1238, 1221, 1079, 963, 952, 771, 747, 724, 701 cm<sup>-1</sup>.

HRMS: (ESI) calcd for C<sub>25</sub>H<sub>15</sub>O<sub>3</sub><sup>+</sup> [M+H]<sup>+</sup> 363.10157; found 363.10104.

UV(in PhH) λ<sub>max</sub> = 467 nm, ε<sub>max</sub> = 8400 mol<sup>-1</sup>.L.cm<sup>-1</sup>.

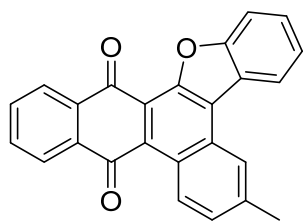

### 3o

8-Methyltetrapheno[6,5-b]benzofuran-5,15-dione

Yellow solid, m.p. 269-270 °C (DCM/PE =3/1).

<sup>1</sup>H NMR (500 MHz, CDCl<sub>3</sub>) δ 9.61 (d, *J* = 9.0 Hz, 1H), 8.45 (d, *J* = 7.9 Hz, 1H), 8.43 (s, 1H), 8.28 (ddd, *J* = 9.2, 6.6, 2.2 Hz, 2H), 7.90 (d, *J* = 8.3 Hz, 1H), 7.83 – 7.77 (m, 2H), 7.62 (t, *J* = 7.7 Hz, 1H), 7.58 – 7.55 (m, 1H), 7.52 (t, *J* = 7.5 Hz, 1H), 2.67 (s, 3H).

<sup>13</sup>C NMR (126 MHz, CDCl<sub>3</sub>) δ 186.2, 183.2, 158.3, 150.5, 140.4, 135.0, 134.1, 133.7, 132.9, 132.6, 130.4, 130.0, 129.2, 128.4, 127.2, 126.4, 126.1, 124.8, 124.0, 123.12, 123.07, 123.05, 121.2, 113.1, 22.3.

IR (KBr) ν<sub>max</sub>: 3069, 3026, 2921, 2854, 1673, 1655, 1619, 1592, 1574, 1461, 1342, 1325, 1300, 1287, 1244, 1219, 1202, 1184, 1125, 1110, 1056, 1019, 797, 743 cm<sup>-1</sup>.

HRMS: (ESI) calcd for C<sub>25</sub>H<sub>15</sub>O<sub>3</sub><sup>+</sup> [M+H]<sup>+</sup> 363.10157; found 363.10107.

UV(in PhH) λ<sub>max</sub> = 446 nm, ε<sub>max</sub> = 7160 mol<sup>-1</sup>.L.cm<sup>-1</sup>.

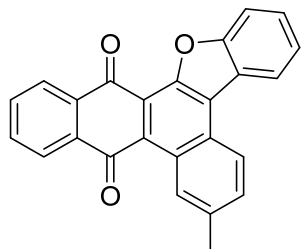

### 3p

7-Methyltetrapheno[6,5-*b*]benzofuran-5,15-dione

Yellow solid, m.p. 251-253 °C (DCM/PE =3/1).

<sup>1</sup>H NMR (500 MHz, CDCl<sub>3</sub>) δ 9.49 (s, 1H), 8.51 (d, *J* = 8.4 Hz, 1H), 8.37 (d, *J* = 7.9 Hz, 1H), 8.29 – 8.24 (m, 2H), 7.87 (d, *J* = 8.3 Hz, 1H), 7.83 – 7.76 (m, 2H), 7.62 – 7.57 (m, 2H), 7.49 (t, *J* = 7.5 Hz, 1H), 2.61 (s, 3H).

<sup>13</sup>C NMR (126 MHz, CDCl<sub>3</sub>) δ 186.1, 183.3, 158.4, 149.8, 138.2, 135.0, 134.2, 133.6, 132.8, 131.9, 130.3, 129.1, 128.5(2C), 128.2, 127.1, 126.4, 125.4, 124.0, 123.4, 123.04, 122.99, 121.8, 113.1, 22.5.

IR(KBr) ν<sub>max</sub>: 3075, 3061, 2940, 2913, 1675, 1654, 1615, 1572, 1457, 1341, 1290, 1242, 1214, 1145, 1122, 1110, 1059, 968, 755, 748, 724 cm<sup>-1</sup>.

HRMS: (ESI) calcd for C<sub>25</sub>H<sub>15</sub>O<sub>3</sub><sup>+</sup> [M+H]<sup>+</sup> 363.10157; found 363.10107.

UV(in PhH) λ<sub>max</sub> = 457 nm, ε<sub>max</sub> = 7440 mol<sup>-1</sup>.L.cm<sup>-1</sup>.

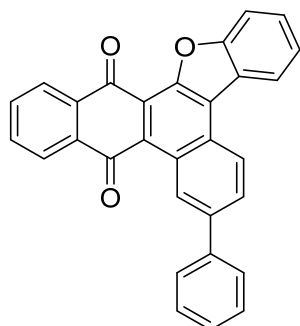

### 3q

7-Phenyltetrapheno[6,5-*b*]benzofuran-5,15-dione

Yellow solid, m.p. >302 °C (DCM/PE =5/1).

$^1\text{H NMR}$  (500 MHz,  $\text{CDCl}_3$ )  $\delta$  10.06 (s, 1H), 8.73 (d,  $J = 8.6$  Hz, 1H), 8.45 (d,  $J = 7.8$  Hz, 1H), 8.29 (d,  $J = 7.1$  Hz, 2H), 8.09 (dd,  $J = 8.6, 1.5$  Hz, 1H), 7.91 (d,  $J = 8.3$  Hz, 1H), 7.86 (d,  $J = 7.4$  Hz, 2H), 7.83 – 7.77 (m, 2H), 7.63 (t,  $J = 7.7$  Hz, 1H), 7.58 – 7.51 (m, 3H), 7.45 (t,  $J = 7.3$  Hz, 1H).

$^{13}\text{C NMR}$  (126 MHz,  $\text{CDCl}_3$ )  $\delta$  186.1, 183.3, 158.9, 158.5, 150.3, 140.8, 140.7, 135.0, 134.3, 133.7, 132.8, 131.2, 129.3, 129.21(2C), 129.15, 128.7, 128.5, 128.1, 128.0, 127.8(2C), 127.2, 126.5, 125.5, 124.2, 123.1, 123.0, 122.3, 113.2.

IR(KBr)  $\nu_{\text{max}}$ : 3140, 3091, 3067, 3030, 1672, 1655, 1616, 1573, 1453, 1345, 1289, 1267, 1147, 1127, 1109, 1056, 970, 759, 751, 679  $\text{cm}^{-1}$ .

HRMS: (ESI) calcd for  $\text{C}_{30}\text{H}_{17}\text{O}_3^+$   $[\text{M}+\text{H}]^+$  425.11722; found 425.11682.

UV(in PhH)  $\lambda_{\text{max}} = 465$  nm,  $\epsilon_{\text{max}} = 6320$   $\text{mol}^{-1}\cdot\text{L}\cdot\text{cm}^{-1}$ .

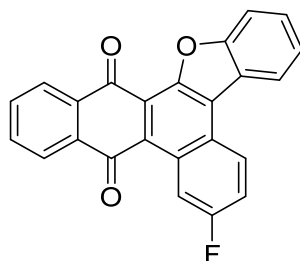

### 3r

7-Fluorotetrapheno[6,5-*b*]benzofuran-5,15-dione.

Yellow solid, m.p. 286-288 °C (DCM/PE =5/1).

$^1\text{H NMR}$  (500 MHz,  $\text{CDCl}_3$ )  $\delta$  9.59 (dd,  $J = 12.9, 2.0$  Hz, 1H), 8.68 (dd,  $J = 8.9, 6.0$  Hz, 1H), 8.39 (d,  $J = 7.8$  Hz, 1H), 8.34 – 8.24 (m, 2H), 7.90 (d,  $J = 8.3$  Hz, 1H), 7.87 – 7.77 (m, 2H), 7.68 – 7.58 (m, 2H), 7.53 (t,  $J = 7.5$  Hz, 1H).

$^{13}\text{C NMR}$  (126 MHz,  $\text{CDCl}_3$ )  $\delta$  185.7, 183.1, 162.4 (d,  $J = 246.9$  Hz), 158.6, 149.8, 134.8, 134.4, 133.9, 132.8, 129.3 (d,  $J = 10.6$  Hz), 129.1, 129.0, 128.0, 127.9, 127.4, 126.5, 126.0, 125.7 (d,  $J = 9.0$  Hz), 124.3, 122.9, 122.7 (d,  $J = 3.5$  Hz), 119.9 (d,  $J = 25.7$  Hz), 114.4 (d,  $J = 25.5$  Hz), 113.3.

$^{19}\text{F NMR}$  (471 MHz,  $\text{CDCl}_3$ )  $\delta$  -110.69 (dt,  $J = 13.0, 6.6$  Hz).

IR(KBr)  $\nu_{\text{max}}$ : 3128, 3079, 3054, 1669, 1595, 1573, 1456, 1435, 1409, 1341, 1325, 1297, 1282, 1246, 1222, 1195, 1160, 1139, 1113, 1056, 1026, 971, 880, 812, 733, 721, 675  $\text{cm}^{-1}$ .

HRMS: (ESI) calcd for  $C_{24}H_{12}FO_3^+$   $[M+H]^+$  367.07650; found 367.07632.

UV(in PhH)  $\lambda_{max} = 450$  nm,  $\epsilon_{max} = 8880$  mol<sup>-1</sup>.L.cm<sup>-1</sup>.

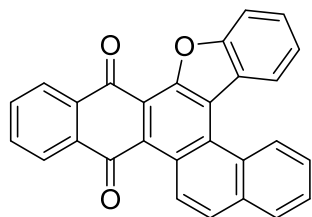

### 3s

Benzo[3,4]tetrapheno[6,5-b]benzofuran-10,15-dione.

Yellow solid, m.p. 244-246 °C (DCM/PE =3/1).

<sup>1</sup>H NMR (500 MHz, CDCl<sub>3</sub>)  $\delta$  9.49 (d,  $J = 9.4$  Hz, 1H), 9.14 (d,  $J = 8.2$  Hz, 1H), 8.60 (d,  $J = 8.0$  Hz, 1H), 8.36 – 8.28 (m, 2H), 7.99 (d,  $J = 7.7$  Hz, 1H), 7.95 (d,  $J = 9.4$  Hz, 1H), 7.92 (d,  $J = 8.3$  Hz, 1H), 7.85 – 7.79 (m, 2H), 7.77 (t,  $J = 7.0$  Hz, 1H), 7.69 (dd,  $J = 11.1, 4.0$  Hz, 1H), 7.63 (dd,  $J = 11.4, 4.1$  Hz, 1H), 7.41 (t,  $J = 7.3$  Hz, 1H).

<sup>13</sup>C NMR (126 MHz, CDCl<sub>3</sub>)  $\delta$  186.3, 183.0, 158.8, 152.4, 135.3, 134.2, 133.8, 133.4, 133.2, 132.6, 129.28, 129.26, 128.9, 128.6, 128.5, 128.3, 128.1, 127.8, 127.4, 126.5, 126.0, 125.6(2C), 124.1, 123.5, 123.0, 120.5, 113.1.

IR(KBr)  $\nu_{max}$ : 3136, 3067, 3042, 1674, 1655, 1616, 1453, 1296, 1269, 1256, 1243, 1212, 1158, 1064, 1025, 755, 743, 712, 658 cm<sup>-1</sup>.

HRMS: (ESI) calcd for  $C_{28}H_{15}O_3^+$   $[M+H]^+$  399.10157; found 399.10144.

UV(in PhH)  $\lambda_{max} = 450$  nm,  $\epsilon_{max} = 11300$  mol<sup>-1</sup>.L.cm<sup>-1</sup>.

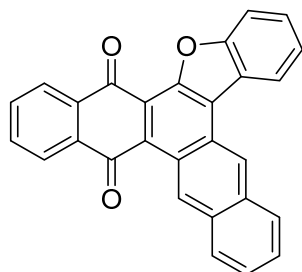

### 3t

Pentapheno[6,7-b]benzofuran-6,11-dione

Purple solid, m.p. >302 °C (DCM/PE =4/1).

<sup>1</sup>H NMR (500 MHz, CDCl<sub>3</sub>)  $\delta$  10.39 (s, 1H), 9.08 (s, 1H), 8.57 (d,  $J = 7.8$  Hz, 1H), 8.31 (dd,  $J = 7.5, 1.2$  Hz, 1H), 8.28 (dd,  $J = 7.4, 1.4$  Hz, 1H), 8.16 (d,  $J = 8.4$  Hz, 1H), 8.08 (d,  $J = 8.3$  Hz, 1H), 7.91 (d,  $J = 8.2$  Hz, 1H), 7.86 – 7.78 (m, 2H), 7.62 (t,  $J = 7.8$  Hz, 2H), 7.56 (dd,  $J = 15.2, 7.4$  Hz, 2H).

<sup>13</sup>C NMR (126 MHz, CDCl<sub>3</sub>)  $\delta$  185.9, 183.0, 158.0, 149.0, 134.7, 134.1, 133.6, 133.0, 132.58, 132.56, 131.5, 130.1, 129.6, 128.8, 128.2, 128.14, 128.11, 127.5, 127.0, 126.3, 126.2, 125.3, 124.4, 124.1, 123.2, 122.7, 121.7, 113.0.

IR(KBr)  $\nu_{max}$ : 3102, 3073, 3048, 1670, 1651, 1591, 1552, 1469, 1449, 1340, 1332, 1307, 1290, 1255, 1228, 1211, 1181, 1158, 1146, 1132, 1106, 1049, 1020, 745, 737 cm<sup>-1</sup>.

HRMS: (ESI) calcd for  $C_{28}H_{15}O_3^+$   $[M+H]^+$  399.10157; found 399.10120.

UV(in PhH)  $\lambda_{max} = 537$  nm,  $\epsilon_{max} = 14200$  mol<sup>-1</sup>.L.cm<sup>-1</sup>.

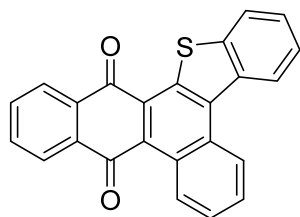

### 3u

Benzo[b]tetrapheno[5,6-d]thiophene-5,15-dione

Yellow solid, m.p. 244-246 °C (DCM/PE =3/1).

$^1\text{H}$  NMR (500 MHz,  $\text{CDCl}_3$ )  $\delta$  9.64 (d,  $J = 8.2$  Hz, 1H), 9.00 (d,  $J = 8.4$  Hz, 1H), 8.77 (d,  $J = 7.6$  Hz, 1H), 8.28 – 8.22 (m, 2H), 8.06 – 8.00 (m, 1H), 7.82 – 7.74 (m, 3H), 7.73 – 7.68 (m, 1H), 7.58 – 7.51 (m, 2H).

$^{13}\text{C}$  NMR (126 MHz,  $\text{CDCl}_3$ )  $\delta$  185.8, 184.3, 145.7, 136.3, 134.91, 134.85, 134.4, 134.0, 133.7, 133.3, 132.0, 130.1, 129.8, 129.2, 129.1, 128.2, 128.0, 127.3, 127.1, 126.7, 125.8, 125.3, 123.8, 123.3.

IR(KBr)  $\nu_{\text{max}}$ : 3130, 3063, 1658, 1591, 1528, 1430, 1405, 1333, 1310, 1291, 1272, 1221, 1210, 1148, 1099, 1083, 1068, 1058, 1043, 1014, 782, 754, 718, 658  $\text{cm}^{-1}$ .

HRMS: (ESI) calcd for  $\text{C}_{24}\text{H}_{13}\text{O}_2\text{S}^+$   $[\text{M}+\text{H}]^+$  365.06308; found 365.06287.

UV(in PhH)  $\lambda_{\text{max}} = 462$  nm,  $\epsilon_{\text{max}} = 8160$   $\text{mol}^{-1}\cdot\text{L}\cdot\text{cm}^{-1}$ .

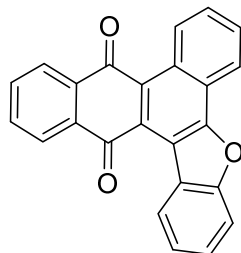

### 5a

Tetrapheno[5,6-b]benzofuran-10,15-dione

Yellow solid, m.p. 216-218 °C (DCM/PE =2/1).

$^1\text{H}$  NMR (500 MHz,  $\text{CDCl}_3$ )  $\delta$  9.75 – 9.70 (m, 1H), 9.30 – 9.23 (m, 1H), 8.65 – 8.60 (m, 1H), 8.36 – 8.27 (m, 2H), 7.89 – 7.79 (m, 4H), 7.77 (d,  $J = 8.1$  Hz, 1H), 7.64 – 7.58 (m, 1H), 7.57 – 7.50 (m, 1H).

$^{13}\text{C}$  NMR (126 MHz,  $\text{CDCl}_3$ )  $\delta$  186.0, 185.1, 157.1, 156.4, 134.6, 134.0, 133.4, 132.9, 132.0, 130.3, 129.8, 129.5, 129.0, 128.0, 127.5, 127.4, 126.9, 126.4, 124.1, 123.8(2C), 121.5, 116.5, 111.5.

IR(KBr)  $\nu_{\text{max}}$ : 3116, 3052, 3016, 1676, 1655, 1594, 1453, 1347, 1294, 1277, 1244, 1203, 1110, 1086, 1062, 1048, 1021, 1005, 795, 760, 746, 716, 681  $\text{cm}^{-1}$ .

HRMS: (ESI) calcd for  $\text{C}_{24}\text{H}_{13}\text{O}_3^+$   $[\text{M}+\text{H}]^+$  349.08592; found 349.08557.

UV(in PhH)  $\lambda_{\text{max}} = 445$  nm,  $\epsilon_{\text{max}} = 5920$   $\text{mol}^{-1}\cdot\text{L}\cdot\text{cm}^{-1}$ .

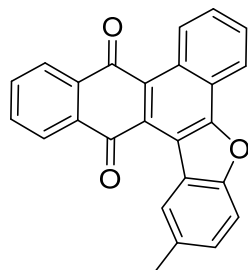

### 5b

#### 2-Methyltetrapheno[5,6-b]benzofuran-10,15-dione

Yellow solid, m.p. 230-232 °C (DCM/PE =3/1).

$^1\text{H}$  NMR (500 MHz,  $\text{CDCl}_3$ )  $\delta$  9.60 (dd,  $J = 7.3, 2.1$  Hz, 1H), 8.88 (s, 1H), 8.44 (dd,  $J = 6.8, 2.6$  Hz, 1H), 8.28 – 8.20 (m, 2H), 7.82 – 7.76 (m, 2H), 7.72 (ddt,  $J = 9.5, 6.8, 3.5$  Hz, 2H), 7.52 (d,  $J = 8.3$  Hz, 1H), 7.33 (d,  $J = 7.4$  Hz, 1H), 2.59 (s, 3H).

$^{13}\text{C}$  NMR (126 MHz,  $\text{CDCl}_3$ )  $\delta$  186.1, 185.3, 156.8, 155.5, 134.7, 134.0, 133.4, 133.3, 133.0, 132.1, 130.3, 129.7, 129.5, 129.2, 129.0, 127.34, 127.29, 126.9, 126.4, 124.0, 123.9, 121.6, 116.5, 110.9, 22.0.

IR(KBr)  $\nu_{\text{max}}$ : 3120, 3069, 3020, 2926, 1672, 1660, 1591, 1344, 1319, 1298, 1203, 1116, 800, 755, 683  $\text{cm}^{-1}$ .

HRMS: (ESI) calcd for  $\text{C}_{25}\text{H}_{15}\text{O}_3^+$   $[\text{M}+\text{H}]^+$  363.10157; found 363.10107.

UV(in PhH)  $\lambda_{\text{max}} = 450$  nm,  $\epsilon_{\text{max}} = 8240$   $\text{mol}^{-1} \cdot \text{L} \cdot \text{cm}^{-1}$ .

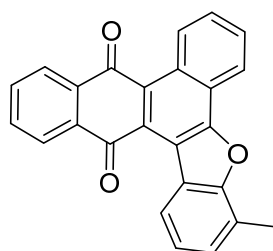

### 5c

#### 4-Methyltetrapheno[5,6-b]benzofuran-10,15-dione

Yellow solid, m.p. 206-208 °C (DCM/PE =3/1).

$^1\text{H}$  NMR (500 MHz,  $\text{CDCl}_3$ )  $\delta$  9.62 – 9.58 (m, 1H), 8.95 – 8.90 (m, 1H), 8.49 – 8.44 (m, 1H), 8.26 – 8.20 (m, 2H), 7.81 – 7.74 (m, 2H), 7.74 – 7.67 (m, 2H), 7.35 – 7.30 (m, 2H), 2.65 (s, 3H).

$^{13}\text{C}$  NMR (126 MHz,  $\text{CDCl}_3$ )  $\delta$  186.1, 185.2, 156.3, 156.0, 134.7, 134.0, 133.4, 133.0, 132.1, 130.3, 129.7, 129.5, 129.1, 128.9, 127.3, 126.9, 126.4, 124.9, 123.9, 123.7, 123.6, 121.53, 121.51, 116.9, 15.3.

IR(KBr)  $\nu_{\text{max}}$ : 3140, 3067, 3022, 2923, 1675, 1657, 1592, 1435, 1343, 1300, 1249, 1196, 1110, 1058, 798, 756, 745  $\text{cm}^{-1}$ .

HRMS: (ESI) calcd for  $\text{C}_{25}\text{H}_{15}\text{O}_3^+$   $[\text{M}+\text{H}]^+$  363.10157; found 363.10101.

UV(in PhH)  $\lambda_{\text{max}} = 459$  nm,  $\epsilon_{\text{max}} = 9240$   $\text{mol}^{-1} \cdot \text{L} \cdot \text{cm}^{-1}$ .

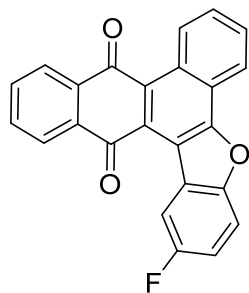

### 5d

2-Fluorotetrapheno[5,6-b]benzofuran-10,15-dione

Yellow solid, m.p. 256-258 °C (DCM/PE =4/1)

$^1\text{H NMR}$  (500 MHz,  $\text{CDCl}_3$ )  $\delta$  9.68 (dd,  $J = 7.3, 1.8$  Hz, 1H), 8.96 (dd,  $J = 10.4, 2.7$  Hz, 1H), 8.57 – 8.51 (m, 1H), 8.34 – 8.25 (m, 2H), 7.85 – 7.77 (m, 4H), 7.66 (dd,  $J = 8.9, 4.4$  Hz, 1H), 7.31 (td,  $J = 8.6, 2.8$  Hz, 1H).

This compound is difficult to solute and no clear  $^{13}\text{CNMR}$  signal in solvent could be obtained.

$^{19}\text{F NMR}$  (471 MHz,  $\text{CDCl}_3$ )  $\delta$  -118.68 (td,  $J = 8.9, 4.4$  Hz).

IR(KBr)  $\nu_{\text{max}}$ : 3138, 3071, 1671, 1658, 1591, 1572, 1462, 1449, 1419, 1346, 1300, 1258, 1243, 1171, 1160, 1108, 1098, 1088, 1009, 811, 770, 759, 686  $\text{cm}^{-1}$ .

HRMS: (ESI) calcd for  $\text{C}_{24}\text{H}_{12}\text{FO}_3^+$   $[\text{M}+\text{H}]^+$  367.07650; found 367.07605.

UV(in PhH)  $\lambda_{\text{max}} = 439$  nm,  $\epsilon_{\text{max}} = 7750$   $\text{mol}^{-1}\cdot\text{L}\cdot\text{cm}^{-1}$ .

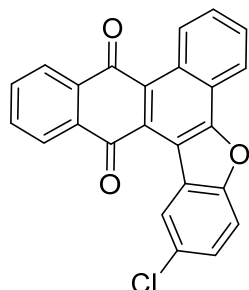

### 5e

2-Chlorotetrapheno[5,6-b]benzofuran-10,15-dione

Yellow solid, m.p. 262-264 °C (DCM/PE =3/1)

$^1\text{H NMR}$  (500 MHz,  $\text{CDCl}_3$ )  $\delta$  9.63 (s, 1H), 9.18 (s, 1H), 8.47 (s, 1H), 8.33 – 8.16 (m, 2H), 7.88 – 7.72 (m, 4H), 7.60 (d,  $J = 7.5$  Hz, 1H), 7.55 – 7.48 (m, 1H).

This compound is difficult to solute and no clear  $^{13}\text{CNMR}$  signal in solvent could be obtained.

IR(KBr)  $\nu_{\text{max}}$ : 3138, 3081, 1674, 1656, 1590, 1448, 1346, 1315, 1298, 1254, 1243, 1113, 1087, 1076, 1047, 1007, 802, 760, 700, 686  $\text{cm}^{-1}$ .

HRMS: (ESI) calcd for  $\text{C}_{24}\text{H}_{12}\text{ClO}_3^+$   $[\text{M}+\text{H}]^+$  383.04695; found 383.04642.

UV(in PhH)  $\lambda_{\text{max}} = 440$  nm,  $\epsilon_{\text{max}} = 7120$   $\text{mol}^{-1}\cdot\text{L}\cdot\text{cm}^{-1}$ .

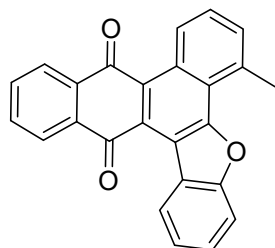

### 5f

6-Methyltetrapheno[5,6-b]benzofuran-10,15-dione

Yellow solid, m.p. 202-204 ° (DCM/PE=3/1).

$^1\text{H}$  NMR (500 MHz,  $\text{CDCl}_3$ )  $\delta$  9.41 (d,  $J = 8.8$  Hz, 1H), 9.13 (d,  $J = 8.1$  Hz, 1H), 8.25 (d,  $J = 6.9$  Hz, 1H), 8.22 (d,  $J = 7.0$  Hz, 1H), 7.81 – 7.75 (m, 2H), 7.67 (d,  $J = 8.1$  Hz, 1H), 7.59 (t,  $J = 7.8$  Hz, 1H), 7.54 (t,  $J = 7.6$  Hz, 1H), 7.49 (d,  $J = 6.9$  Hz, 1H), 7.46 (t,  $J = 7.7$  Hz, 1H), 3.11 (s, 3H).

$^{13}\text{C}$  NMR (126 MHz,  $\text{CDCl}_3$ )  $\delta$  186.3, 185.3, 157.5, 156.8, 135.1, 134.3, 134.0, 133.4, 133.0, 131.74, 131.71, 131.5, 129.1, 128.4, 127.8, 127.3, 127.2, 127.0, 126.4, 123.9, 123.7, 123.2, 117.2, 111.4, 24.2.

IR(KBr)  $\nu_{\text{max}}$ : 3128, 3063, 2918, 2849, 1738, 1673, 1650, 1455, 1338, 1290, 1245, 772, 739, 716  $\text{cm}^{-1}$ .

HRMS: (ESI) calcd for  $\text{C}_{25}\text{H}_{15}\text{O}_3^+$   $[\text{M}+\text{H}]^+$  363.10157; found 363.10132.

UV(in PhH)  $\lambda_{\text{max}} = 457$  nm,  $\epsilon_{\text{max}} = 9280$   $\text{mol}^{-1}\cdot\text{L}\cdot\text{cm}^{-1}$ .

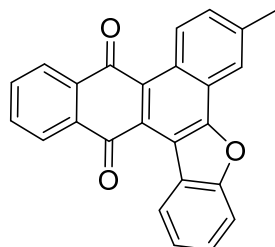

### 5g

7-Methyltetrapheno[5,6-b]benzofuran-10,15-dione

Yellow solid, m.p. 252-254 °C (DCM/PE=3/1).

$^1\text{H}$  NMR (500 MHz,  $\text{CDCl}_3$ )  $\delta$  9.55 (d,  $J = 9.0$  Hz, 1H), 9.22 (d,  $J = 8.0$  Hz, 1H), 8.33 – 8.28 (m, 2H), 8.28 – 8.25 (m, 1H), 7.83 – 7.76 (m, 2H), 7.71 (d,  $J = 8.1$  Hz, 1H), 7.62 – 7.55 (m, 2H), 7.49 (t,  $J = 7.6$  Hz, 1H), 2.63 (s, 3H).

$^{13}\text{C}$  NMR (126 MHz,  $\text{CDCl}_3$ )  $\delta$  186.3, 185.4, 157.2, 156.2, 139.8, 134.8, 134.0, 133.4, 133.1, 132.2, 131.4, 129.4, 128.7, 128.0, 127.7, 127.6, 127.0, 126.5, 124.31, 124.29, 123.8, 120.7, 116.8, 111.5, 22.0.

IR(KBr)  $\nu_{\text{max}}$ : 3122, 3059, 3024, 2919, 2856, 1668, 1630, 1457, 1347, 1291, 1268, 1249, 1203, 1181, 1163, 1113, 1089, 1061, 1040, 1013, 788, 757, 721  $\text{cm}^{-1}$ .

HRMS: (ESI) calcd for  $\text{C}_{25}\text{H}_{15}\text{O}_3^+$   $[\text{M}+\text{H}]^+$  363.10157; found 363.10126.

UV(in PhH)  $\lambda_{\text{max}} = 449$  nm,  $\epsilon_{\text{max}} = 9200$   $\text{mol}^{-1}\cdot\text{L}\cdot\text{cm}^{-1}$ .



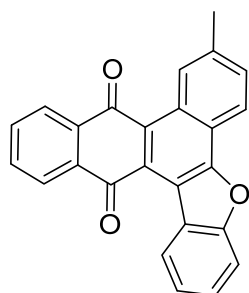

### 5h

8-Methyltetrapheno[5,6-b]benzofuran-10,15-dione

Yellow solid, m.p. 298-298°C (DCM/PE=3/1).

<sup>1</sup>H NMR (500 MHz, CDCl<sub>3</sub>) δ 9.45 (s, 1H), 9.17 (dd, *J* = 8.1, 0.8 Hz, 1H), 8.40 (d, *J* = 8.4 Hz, 1H), 8.29 – 8.23 (m, 2H), 7.82 – 7.75 (m, 2H), 7.68 (d, *J* = 8.1 Hz, 1H), 7.59 – 7.53 (m, 2H), 7.50 – 7.45 (m, 1H), 2.63 (s, 3H).

<sup>13</sup>C NMR (126 MHz, CDCl<sub>3</sub>) δ 186.3, 185.5, 157.2, 156.8, 140.4, 134.9, 134.1, 133.4, 133.1, 132.3, 131.3, 130.9, 128.6, 127.9, 127.5, 127.0, 126.9, 126.5, 124.3, 123.8, 122.2, 121.5, 116.1, 111.5, 22.8.

IR(KBr) ν<sub>max</sub>: 3108, 3057, 3016, 2917, 1672, 1655, 1593, 1449, 1348, 1293, 1246, 1206, 1109, 1087, 816, 744, 720 cm<sup>-1</sup>.

HRMS: (ESI) calcd for C<sub>25</sub>H<sub>15</sub>O<sub>3</sub><sup>+</sup> [M+H]<sup>+</sup> 363.10157; found 363.10107.

UV(in PhH) λ<sub>max</sub> = 459 nm, ε<sub>max</sub> = 9500 mol<sup>-1</sup>.L.cm<sup>-1</sup>.

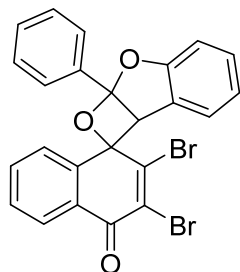

### 6a

2,3-Dibromo-7a'-phenyl-2a',7a'-dihydro-4H-spiro[naphthalene-1,2'-oxeto[2,3-b]benzofuran]-4-one

White solid, m.p. 154-156 °C (DCM/PE =2/1).

<sup>1</sup>H NMR (500 MHz, DMSO) δ 7.90 (dd, *J* = 7.7, 1.2 Hz, 1H), 7.77 – 7.73 (m, 1H), 7.59 (d, *J* = 1.6 Hz, 1H), 7.57 (d, *J* = 1.2 Hz, 1H), 7.53 – 7.45 (m, 3H), 7.40 (td, *J* = 7.5, 1.1 Hz, 1H), 7.34 (td, *J* = 7.6, 1.4 Hz, 1H), 7.13 – 7.08 (m, 1H), 6.92 (d, *J* = 8.0 Hz, 1H), 6.73 (d, *J* = 7.3 Hz, 1H), 6.60 (t, *J* = 7.4 Hz, 1H), 5.36 (s, 1H).

<sup>13</sup>C NMR (126 MHz, DMSO) δ 175.4, 160.7, 151.4, 138.8, 137.1, 132.5, 130.1, 129.4, 129.2, 129.1, 128.3(2C), 127.3, 127.2, 127.1, 125.8, 124.9(2C), 123.7, 122.0, 115.8, 109.2, 88.4, 60.1.

IR(KBr) ν<sub>max</sub>: 3067, 3038, 3001, 1666, 1593, 1555, 1475, 1463, 1451, 1337, 1269, 1235, 1129, 974, 954, 941, 914, 880, 764, 750 cm<sup>-1</sup>.

HRMS: (ESI) calcd for C<sub>24</sub>H<sub>15</sub>Br<sub>2</sub>O<sub>3</sub><sup>+</sup> [M+H]<sup>+</sup> 508.93825; found 508.93781.

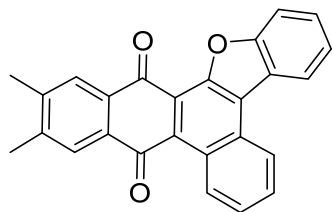

### 7a

2,3-Dimethyltetrapheno[6,5-b]benzofuran-5,15-dione.

Yellow blocks, m.p. 266-268 °C (DCM/PE = 4/1).

$^1\text{H}$  NMR (500 MHz,  $\text{CDCl}_3$ )  $\delta$  9.74 (d,  $J = 8.6$  Hz, 1H), 8.71 – 8.65 (m, 1H), 8.44 (d,  $J = 7.9$  Hz, 1H), 8.00 (s, 2H), 7.91 (d,  $J = 8.3$  Hz, 1H), 7.81 (ddd,  $J = 8.2, 6.8, 1.3$  Hz, 1H), 7.73 (ddd,  $J = 8.4, 6.8, 1.4$  Hz, 1H), 7.62 (ddd,  $J = 8.3, 7.2, 1.2$  Hz, 1H), 7.52 (td,  $J = 7.5, 7.1, 1.0$  Hz, 1H), 2.45 (s, 6H).

$^{13}\text{C}$  NMR (126 MHz,  $\text{CDCl}_3$ )  $\delta$  186.3, 183.3, 158.3, 150.2, 144.1, 143.5, 132.9, 132.1, 130.8, 130.2, 129.6, 129.3, 128.4, 128.1, 127.9, 127.3(2C), 125.2, 124.0, 123.6, 123.05, 122.98, 122.0, 113.1, 20.5, 20.4.

IR(KBr)  $\nu_{\text{max}}$ : 3097, 3061, 2983, 2942, 1738, 1667, 1638, 1600, 1451, 1340, 1321, 1306, 782, 766, 746  $\text{cm}^{-1}$ .

HRMS: (ESI) calcd for  $\text{C}_{26}\text{H}_{17}\text{O}_3^+$   $[\text{M}+\text{H}]^+$  377.11722; found 377.11667.

UV (in PhH)  $\lambda_{\text{max}} = 448$  nm,  $\epsilon_{\text{max}} = 8000$   $\text{mol}^{-1}\cdot\text{L}\cdot\text{cm}^{-1}$ .

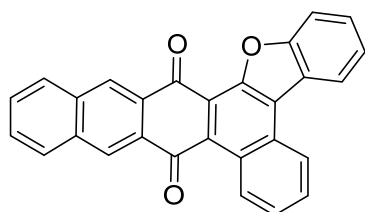

### 8a

Benzo[3,4]tetraceno[1,2-b]benzofuran-9,16-dione

Yellow solid, m.p. >302 °C (DCM/PE =5/1).

$^1\text{H}$  NMR (500 MHz,  $\text{CDCl}_3$ )  $\delta$  9.85 (d,  $J = 8.6$  Hz, 1H), 8.82 (d,  $J = 5.4$  Hz, 2H), 8.75 (d,  $J = 7.7$  Hz, 1H), 8.49 (d,  $J = 7.7$  Hz, 1H), 8.13 (d,  $J = 8.5$  Hz, 2H), 7.96 (d,  $J = 8.3$  Hz, 1H), 7.88 (dd,  $J = 7.6, 6.3$  Hz, 1H), 7.80 (dd,  $J = 8.6, 7.0$  Hz, 1H), 7.73 – 7.68 (m, 2H), 7.66 (t,  $J = 7.8$  Hz, 1H), 7.56 (t,  $J = 7.5$  Hz, 1H).

This compound is difficult to solute and no clear  $^{13}\text{C}$ NMR signal in solvent could be obtained.

IR(KBr)  $\nu_{\text{max}}$ : 3126, 3091, 3059, 1672, 1614, 1570, 1453, 1438, 1403, 1338, 1318, 1288, 1245, 1209, 1180, 1162, 1142, 1054, 1044, 974, 842, 782, 769, 746  $\text{cm}^{-1}$ .

HRMS: (ESI) calcd for  $\text{C}_{28}\text{H}_{15}\text{O}_3^+$   $[\text{M}+\text{H}]^+$  399.10157; found 399.10114.

UV(in PhH)  $\lambda_{\text{max}} = 435$  nm,  $\epsilon_{\text{max}} = 13280$   $\text{mol}^{-1}\cdot\text{L}\cdot\text{cm}^{-1}$ .

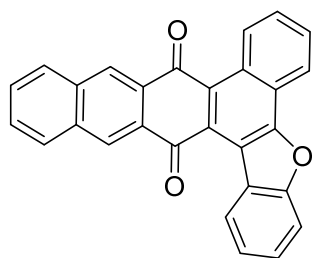

### 8b

Benzo[3,4]tetraceno[2,1-b]benzofuran-10,17-dione

Yellow solid, m.p. >302 °C (DCM/PE =5/1).

<sup>1</sup>H NMR (500 MHz, CDCl<sub>3</sub>) δ 9.81 (dd, *J* = 7.7, 1.6 Hz, 1H), 9.30 (d, *J* = 7.9 Hz, 1H), 8.87 (s, 1H), 8.82 (s, 1H), 8.64 (dd, *J* = 7.1, 2.1 Hz, 1H), 8.13 (dd, *J* = 5.2, 3.6 Hz, 2H), 7.89 – 7.81 (m, 2H), 7.78 (d, *J* = 8.1 Hz, 1H), 7.74 – 7.67 (m, 2H), 7.62 (t, *J* = 7.4 Hz, 1H), 7.55 (t, *J* = 7.5 Hz, 1H).

This compound is difficult to solute and no clear <sup>13</sup>CNMR signal in solvent could be obtained.

IR(KBr) ν<sub>max</sub>: 3134, 3052, 1671, 1619, 1460, 1452, 1425, 1403, 1367, 1343, 1296, 1250, 1217, 1198, 1186, 1131, 1077, 1055, 1025, 1017, 769, 736, 618 cm<sup>-1</sup>.

HRMS: (ESI) calcd for C<sub>28</sub>H<sub>15</sub>O<sub>3</sub><sup>+</sup> [M+H]<sup>+</sup> 399.10157; found 399.10114.

UV(in PhH) λ<sub>max</sub> = 428 nm, ε<sub>max</sub> = 11440 mol<sup>-1</sup>.L.cm<sup>-1</sup>.

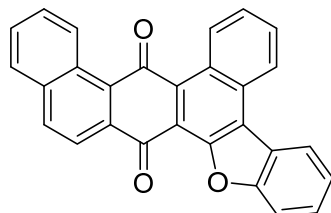

### 9a

Benzo[10,11]tetrapheno[6,5-b]benzofuran-7,17-dione

Yellow solid, m.p. >302 °C (DCM/PE =4/1).

<sup>1</sup>H NMR (500 MHz, CDCl<sub>3</sub>) δ 9.66 (d, *J* = 8.7 Hz, 1H), 9.61 (d, *J* = 8.7 Hz, 1H), 8.68 (d, *J* = 8.2 Hz, 1H), 8.44 (d, *J* = 7.8 Hz, 1H), 8.32 (d, *J* = 8.5 Hz, 1H), 8.19 (d, *J* = 8.5 Hz, 1H), 7.93 (t, *J* = 8.3 Hz, 2H), 7.84 – 7.72 (m, 3H), 7.67 (t, *J* = 7.6 Hz, 1H), 7.63 (t, *J* = 7.8 Hz, 1H), 7.52 (t, *J* = 7.5 Hz, 1H).

<sup>13</sup>C NMR (126 MHz, CDCl<sub>3</sub>) δ 186.7, 186.1, 158.3, 150.0, 136.4, 135.3, 135.1, 131.9, 129.97, 129.96, 129.66, 129.62, 129.0(2C), 128.8, 128.7, 128.5, 128.2, 127.9, 127.4, 125.5, 124.1, 123.8, 123.6, 123.2, 123.1, 122.7, 113.1.

IR(KBr) ν<sub>max</sub>: 3079, 3059, 3038, 1668, 1615, 1569, 1454, 1342, 1298, 1235, 1209, 1169, 1146, 1122, 1074, 1057, 772, 744, 724 cm<sup>-1</sup>.

HRMS: (ESI) calcd for C<sub>28</sub>H<sub>15</sub>O<sub>3</sub><sup>+</sup> [M+H]<sup>+</sup> 399.10157; found 399.10098.

UV(in PhH) λ<sub>max</sub> = 428 nm, ε<sub>max</sub> = 10350 mol<sup>-1</sup>.L.cm<sup>-1</sup>.

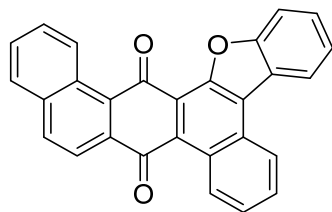

**9a'**

Benzo[8,9]tetrapheno[6,5-b]benzofuran-7,17-dione

Yellow solid, m.p. >302 °C (DCM/PE =4/1).

<sup>1</sup>H NMR (500 MHz, CDCl<sub>3</sub>) δ 9.35 (d, *J* = 8.7 Hz, 1H), 9.25 (d, *J* = 8.6 Hz, 1H), 8.71 (d, *J* = 8.2 Hz, 1H), 8.45 (d, *J* = 7.8 Hz, 1H), 8.35 (d, *J* = 8.5 Hz, 1H), 8.17 (d, *J* = 8.5 Hz, 1H), 7.94 (t, *J* = 8.1 Hz, 2H), 7.86 (t, *J* = 7.5 Hz, 1H), 7.80 – 7.74 (m, 2H), 7.68 (t, *J* = 7.4 Hz, 1H), 7.63 (t, *J* = 7.7 Hz, 1H), 7.54 (t, *J* = 7.5 Hz, 1H).

<sup>13</sup>C NMR (126 MHz, CDCl<sub>3</sub>) δ 189.6, 183.5, 158.2, 149.6, 136.7, 134.4, 133.1, 133.0, 132.6, 132.3, 130.0, 129.8, 129.6, 129.5, 128.98, 128.96, 128.32, 128.30, 127.6, 127.2, 124.4, 124.2, 123.9, 123.2, 122.9, 121.8, 120.1, 113.2.

IR(KBr) ν<sub>max</sub>: 3091, 3075, 1675, 1654, 1615, 1455, 1345, 1325, 1293, 1217, 1203, 1190, 1170, 1164, 1149, 1117, 1110, 1100, 1044, 1035, 978, 767, 739, 725 cm<sup>-1</sup>.

HRMS: (ESI) calcd for C<sub>28</sub>H<sub>15</sub>O<sub>3</sub><sup>+</sup> [M+H]<sup>+</sup> 399.10157; found 399.10098.

UV(in PhH) λ<sub>max</sub> = 454 nm, ε<sub>max</sub> = 10200 mol<sup>-1</sup>.L.cm<sup>-1</sup>.

## 6. The NMR and HRMS Charts

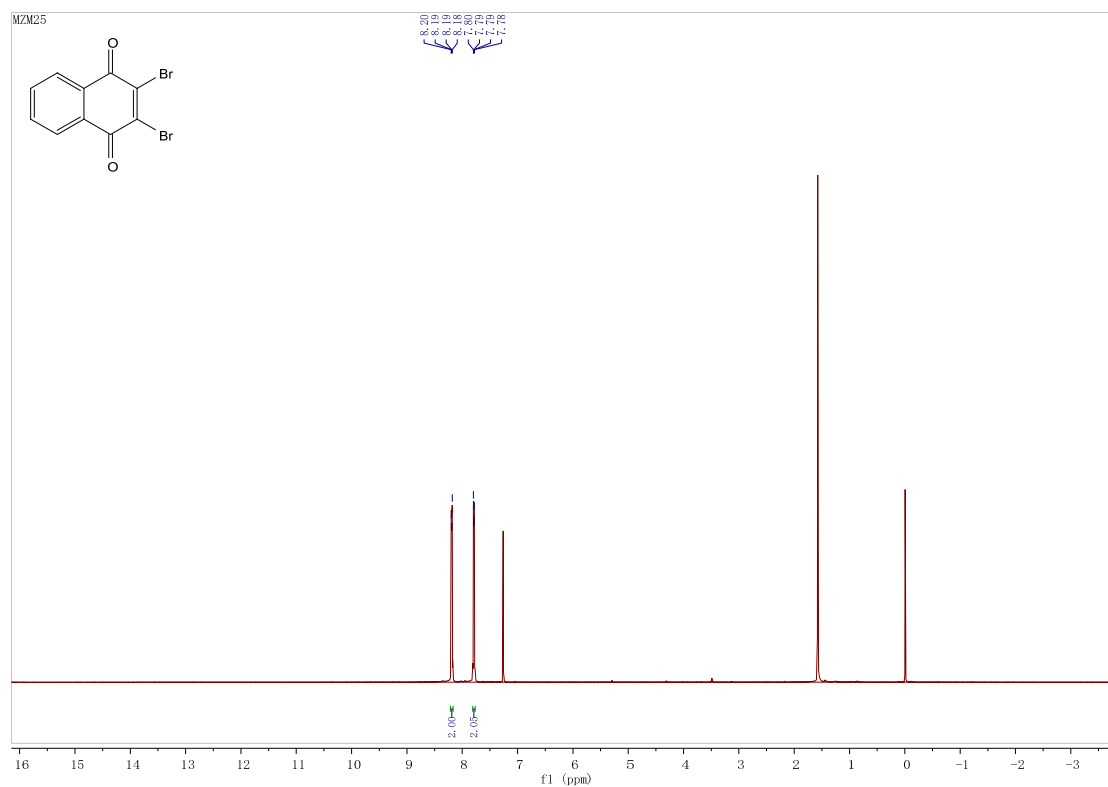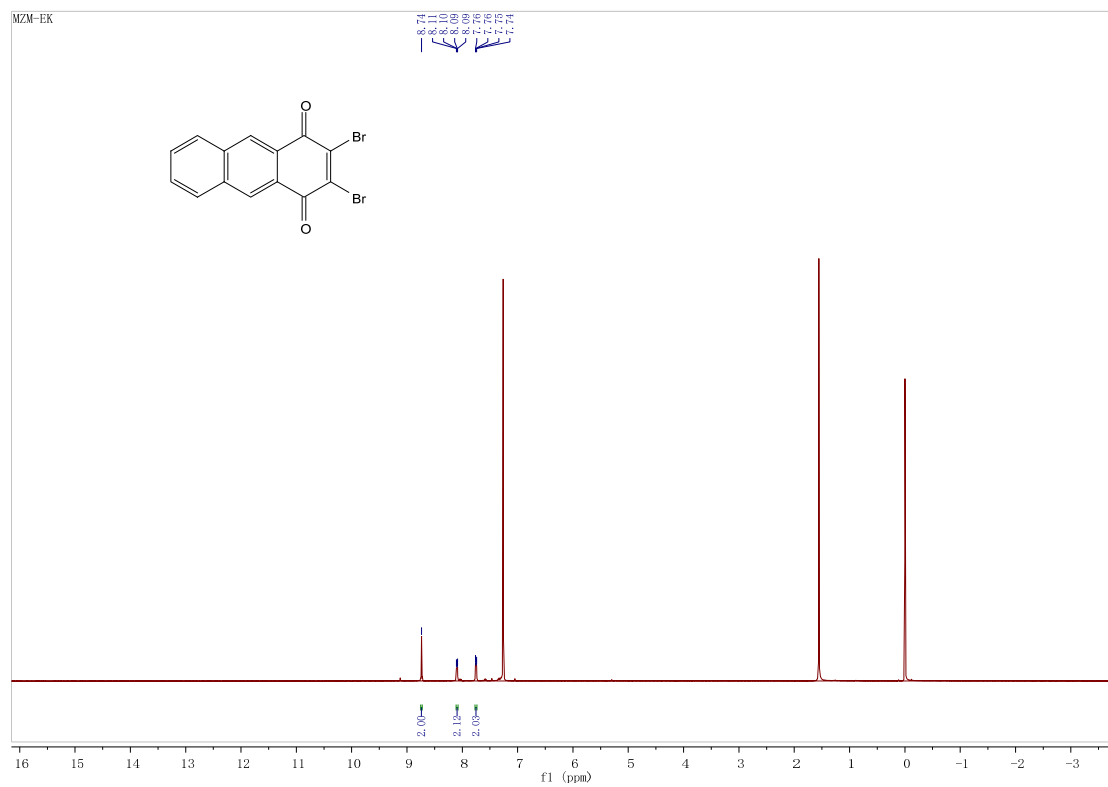

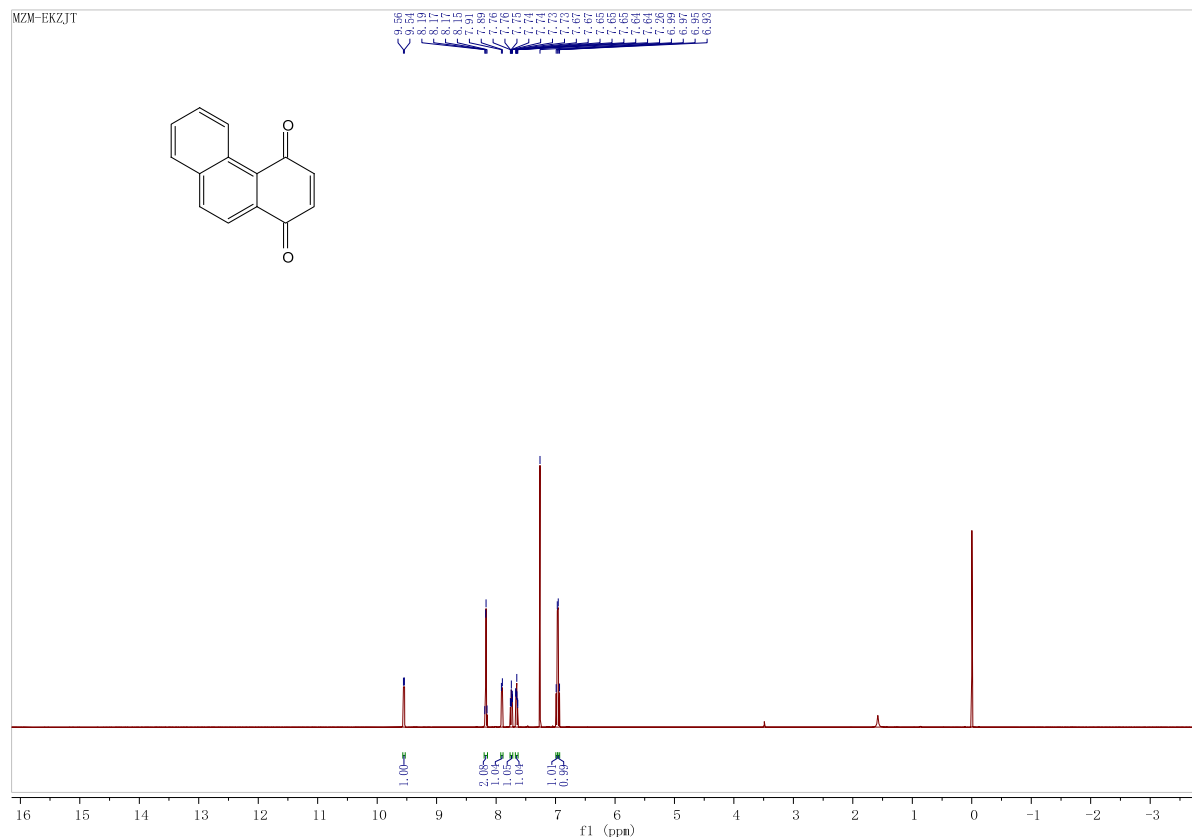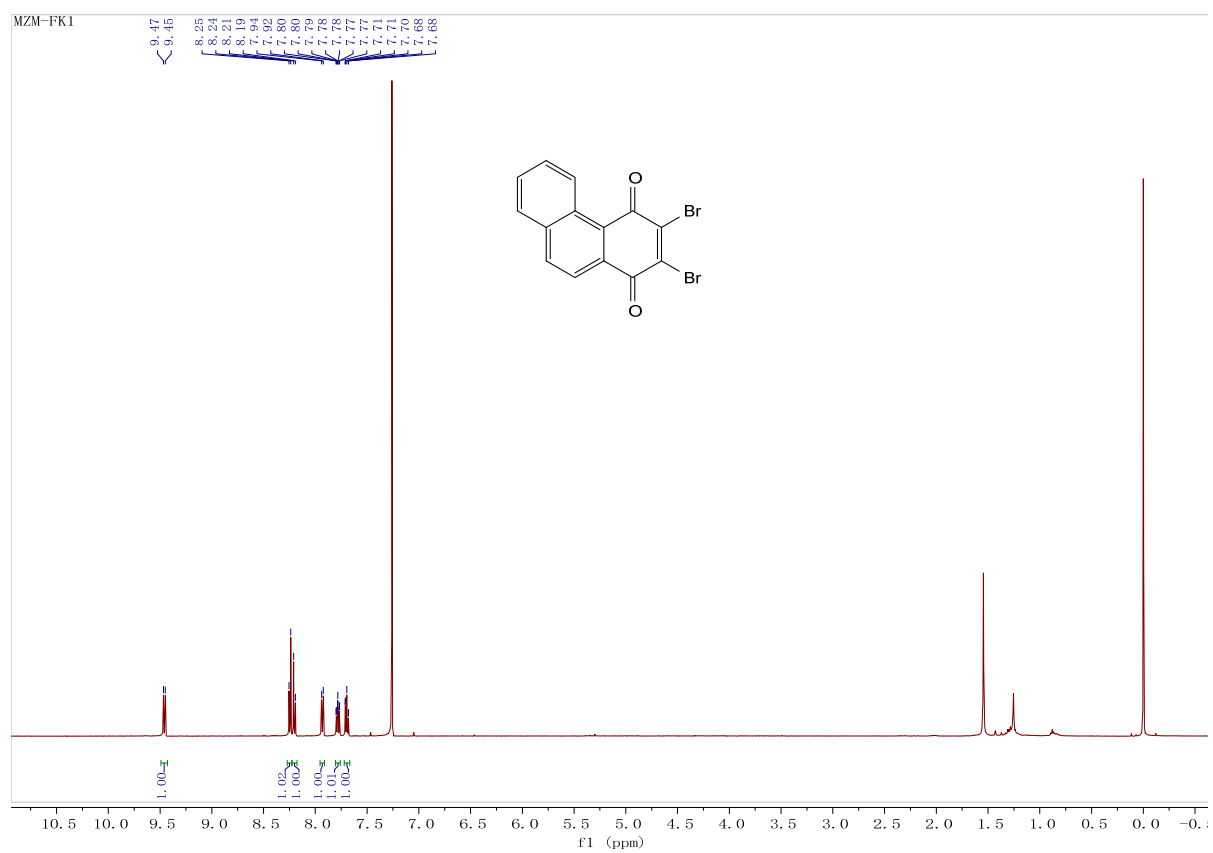



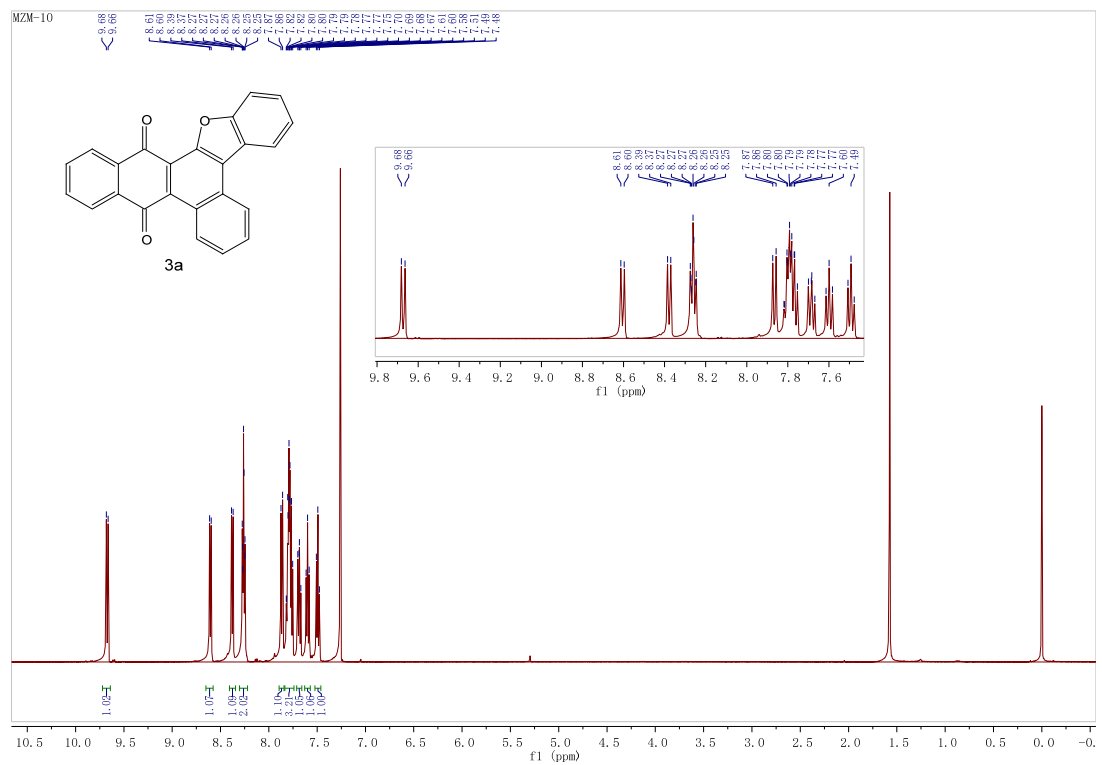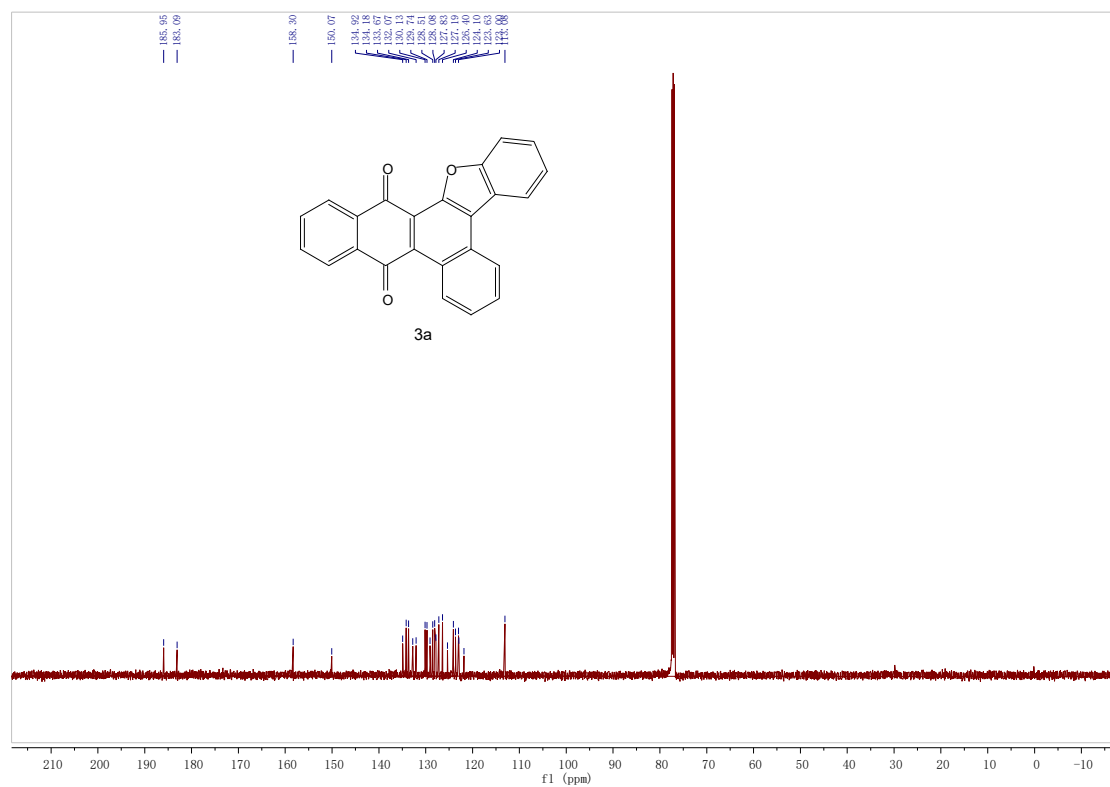



25 #15 RT: 0.16 AV: 1 NL: 1.30E8  
T: FTMS + c APCI corona Full ms [50.0000-750.0000]

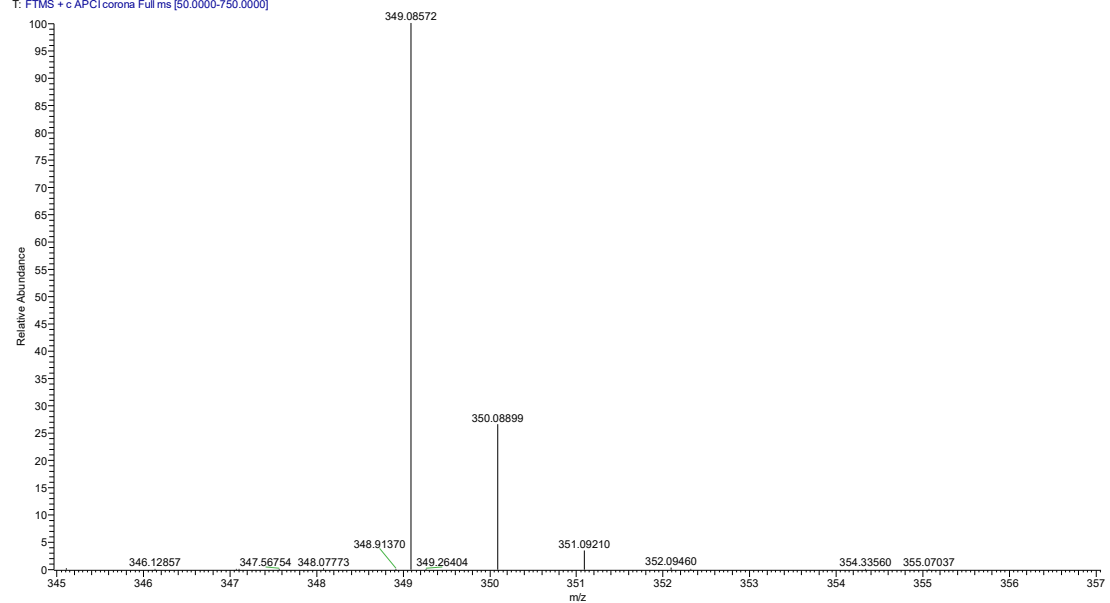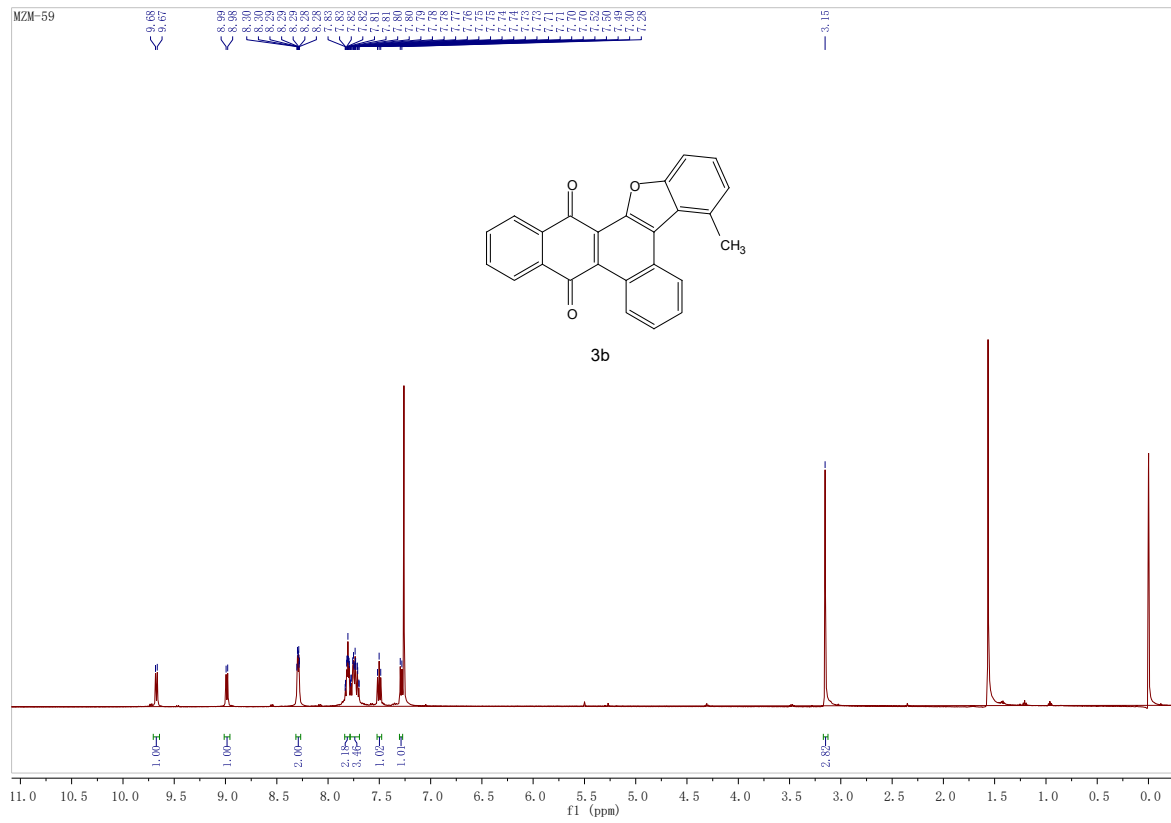

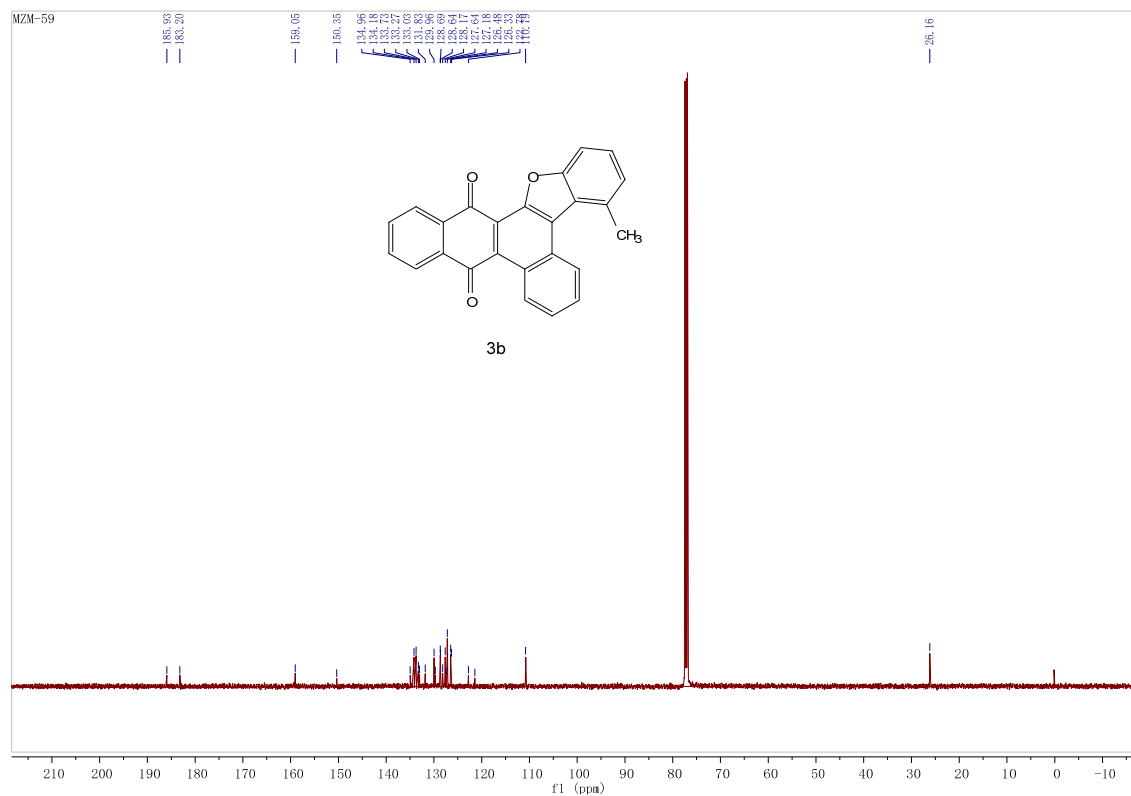

26 #17 RT: 0.18 AV: 1 NL: 1.26E8  
 T: FTMS + cAPCI corona Full ms [50.0000-750.0000]

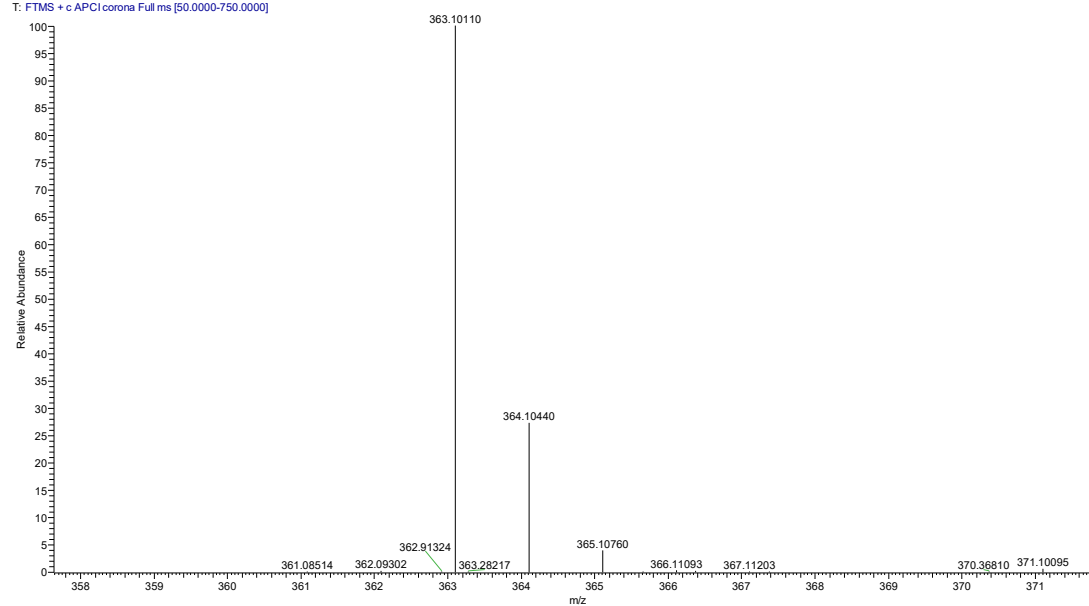



27 #15 RT: 0.16 AV: 1 NL: 1.08E8  
T: FTMS + c APCI corona Full ms [50.0000-750.0000]

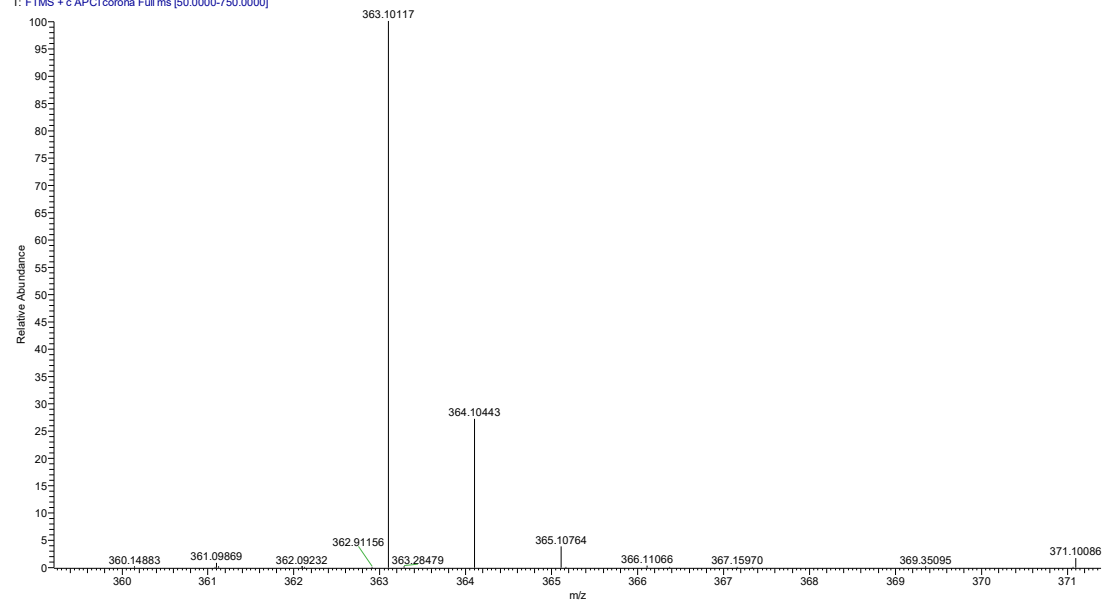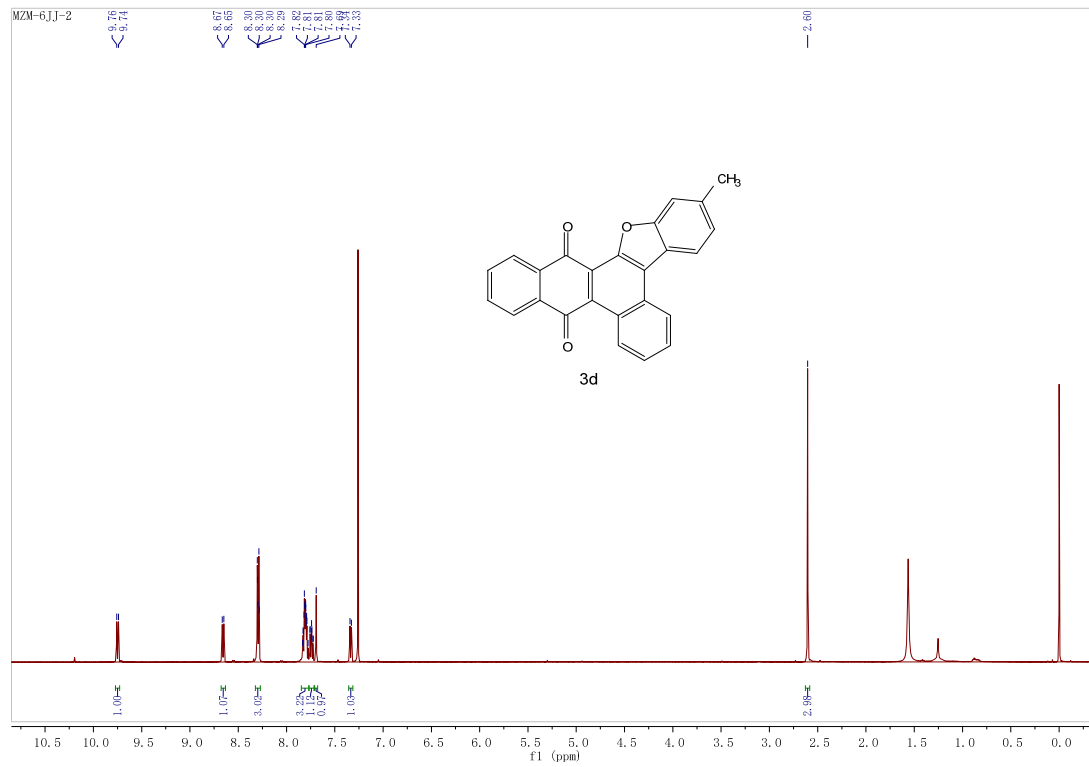

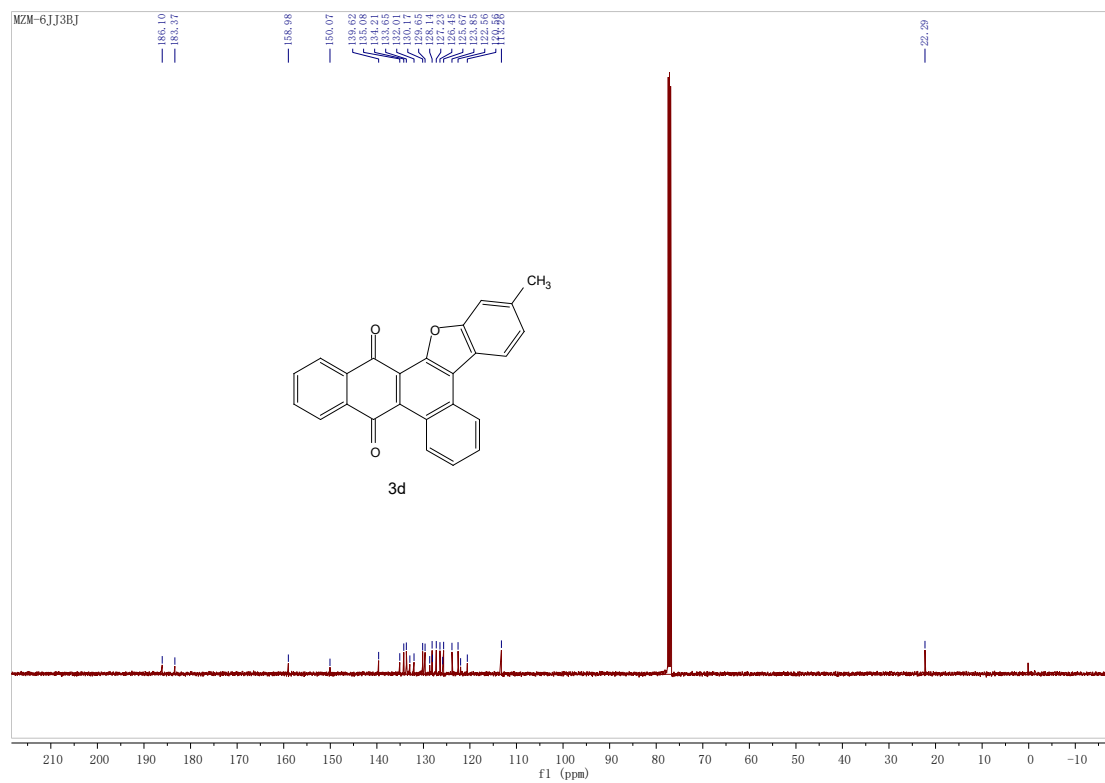

28 #15 RT: 0.17 AV: 1 NL: 4.98E7  
 T: FTMS + cAPCI corona Full ms [50.0000-750.0000]

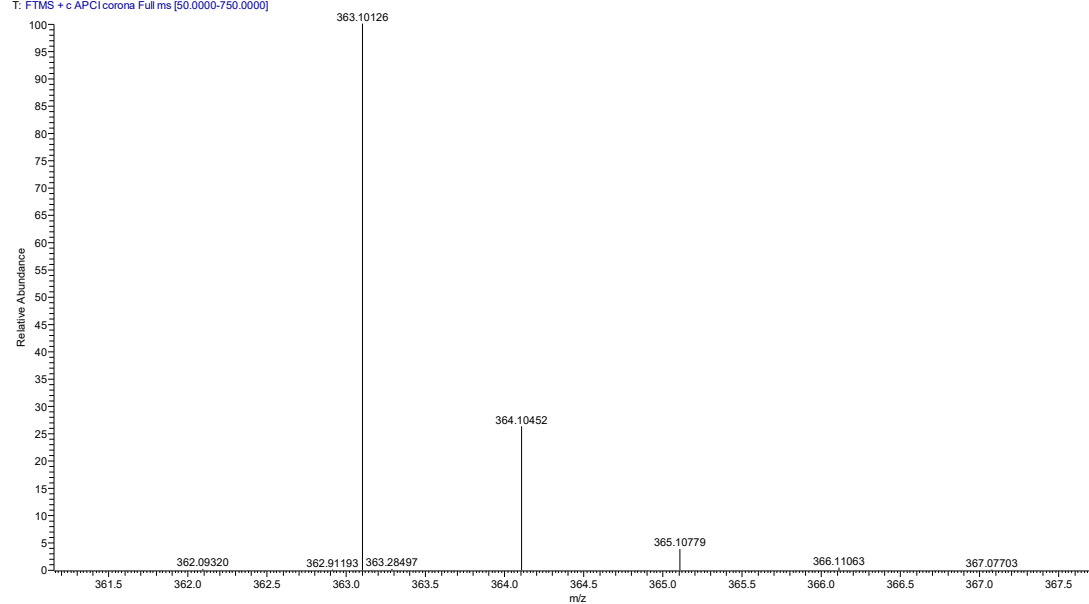

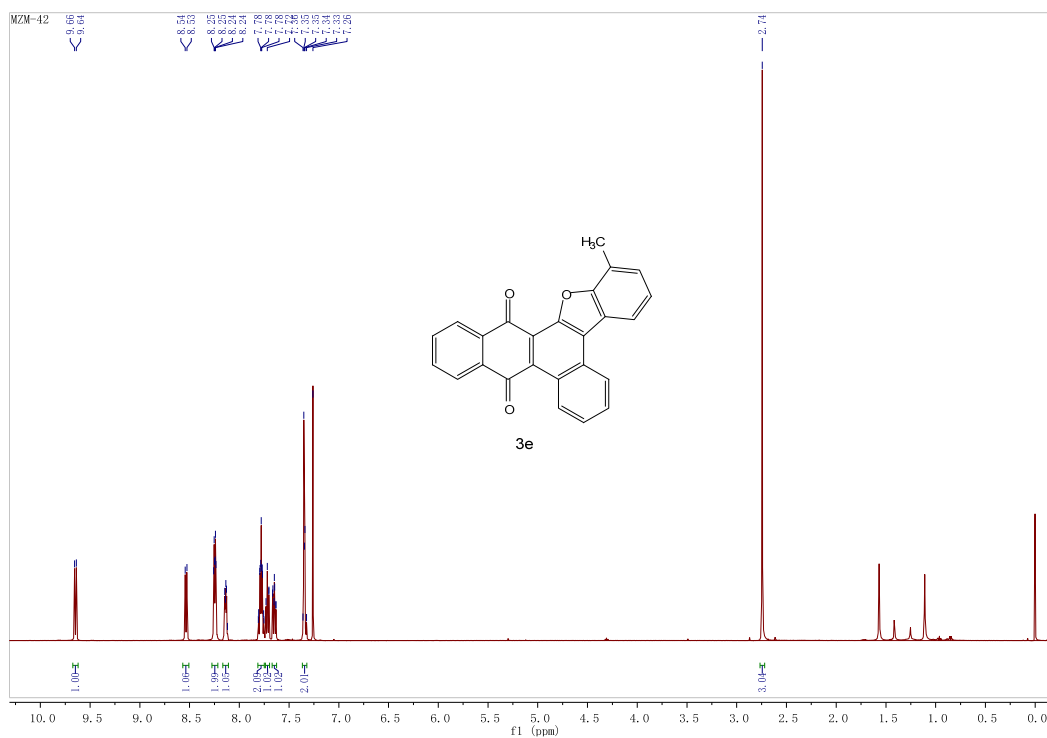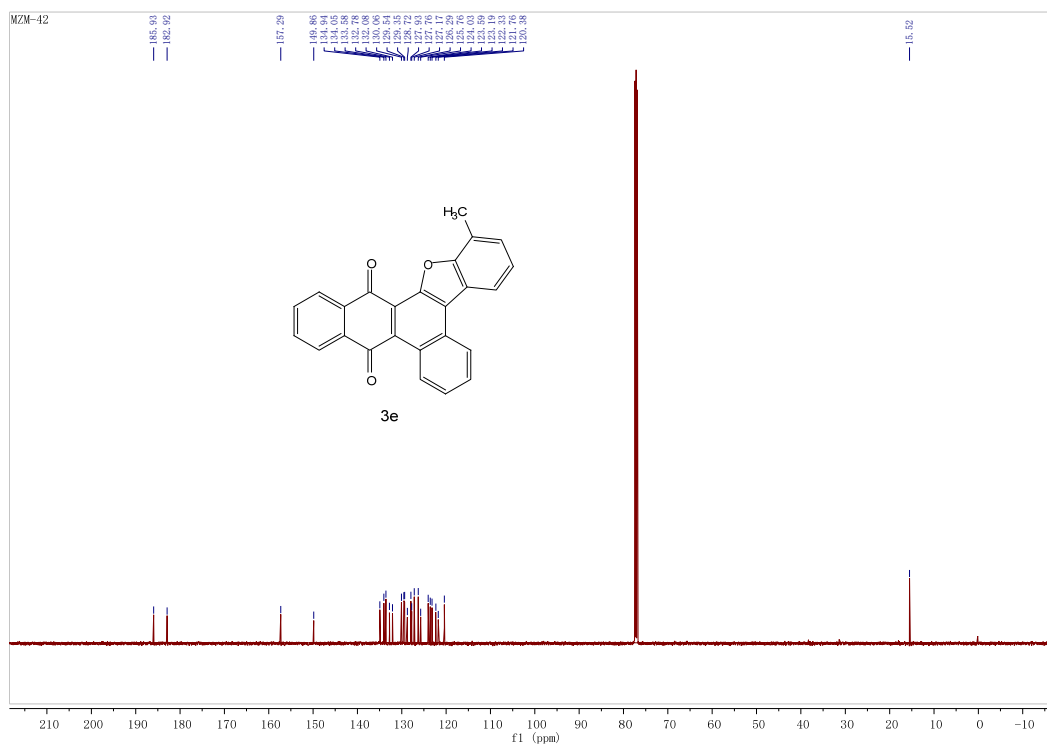

29 #15 RT: 0.17 AV: 1 NL: 5.83E7  
T: FTMS + c APCI corona Full ms [50.0000-750.0000]

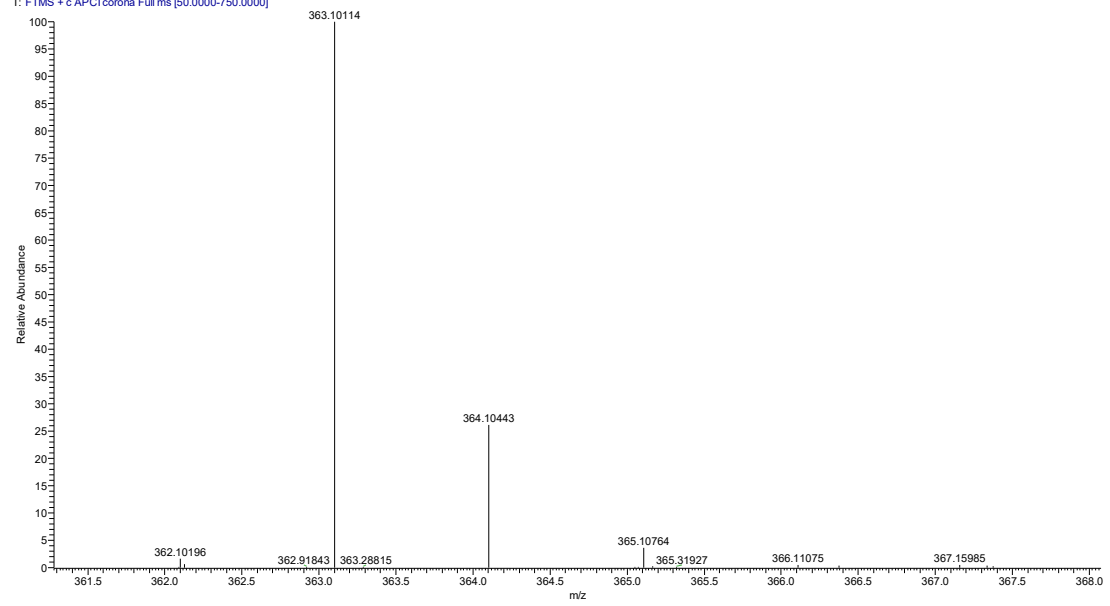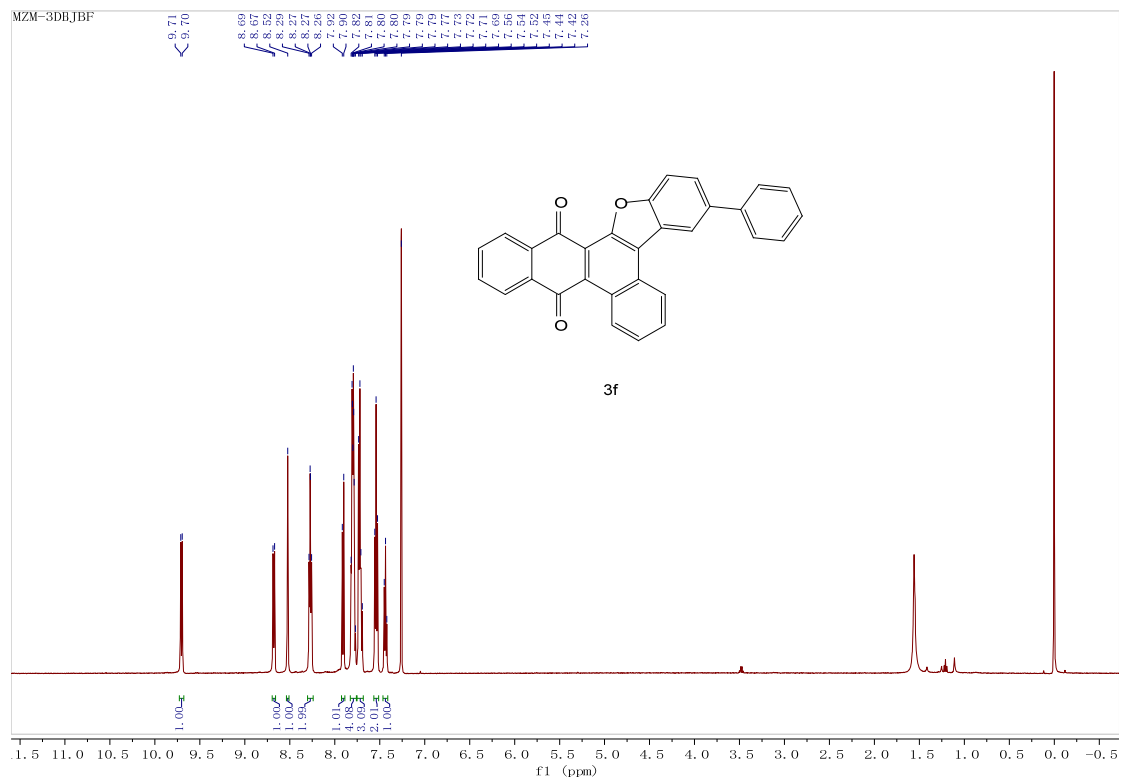

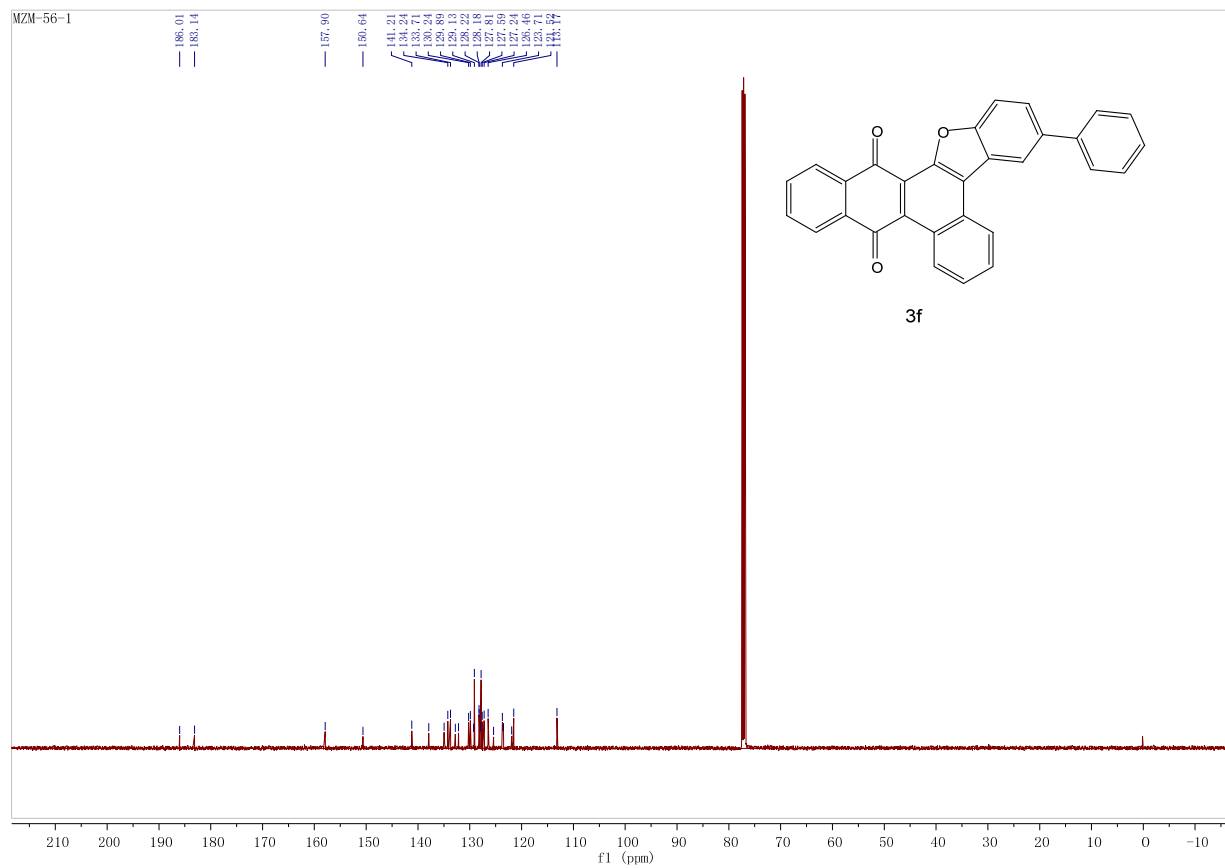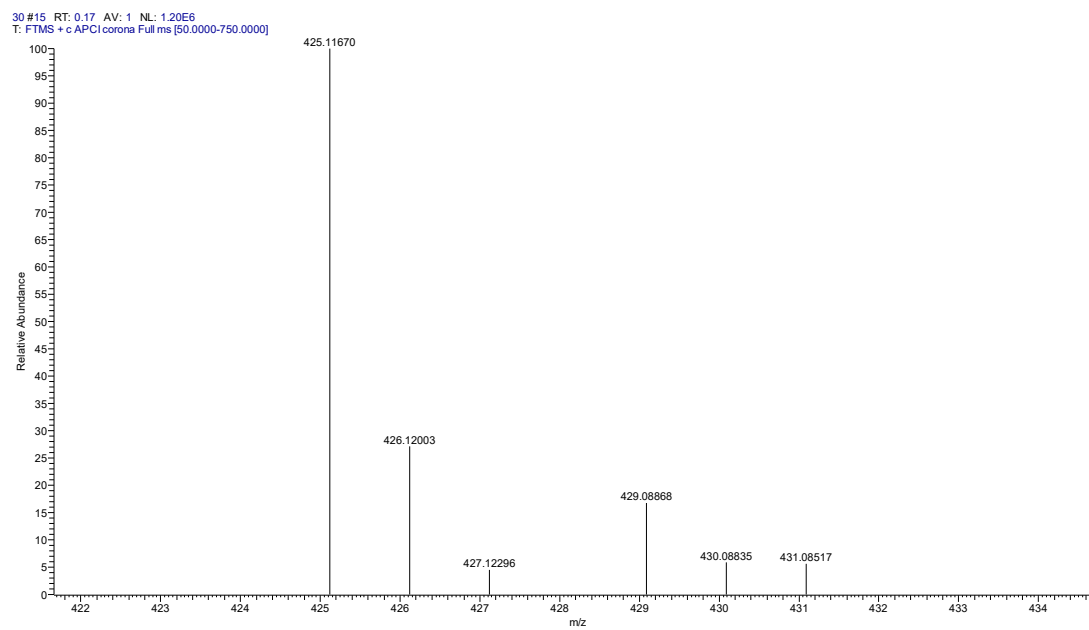





31 #15 RT: 0.17 AV: 1 NL: 7.64E6  
T: FTMS + cAPCI corona Full ms [50.0000-750.0000]

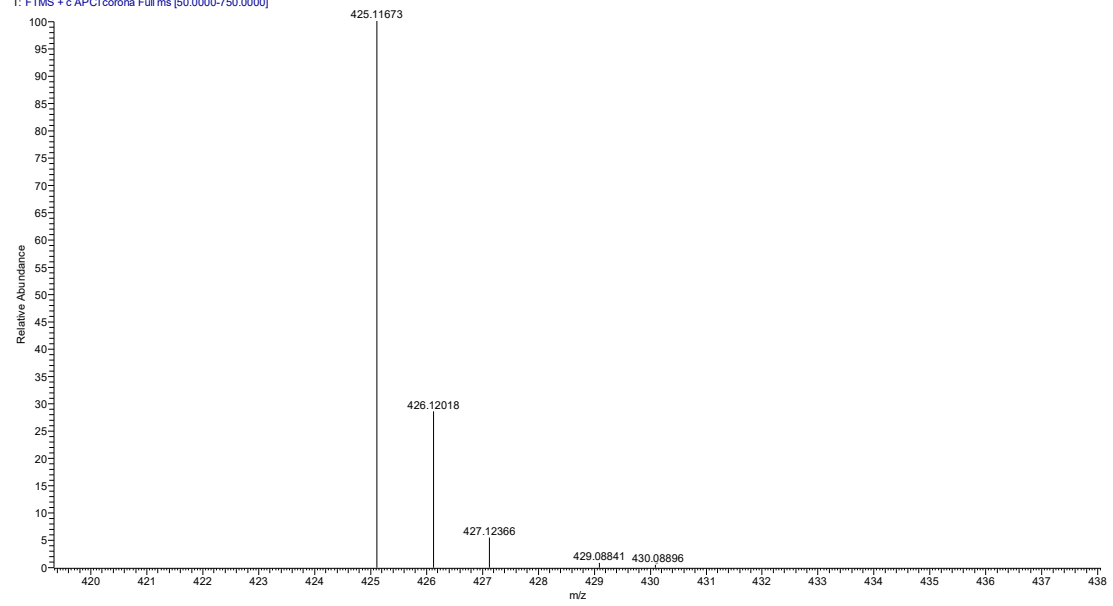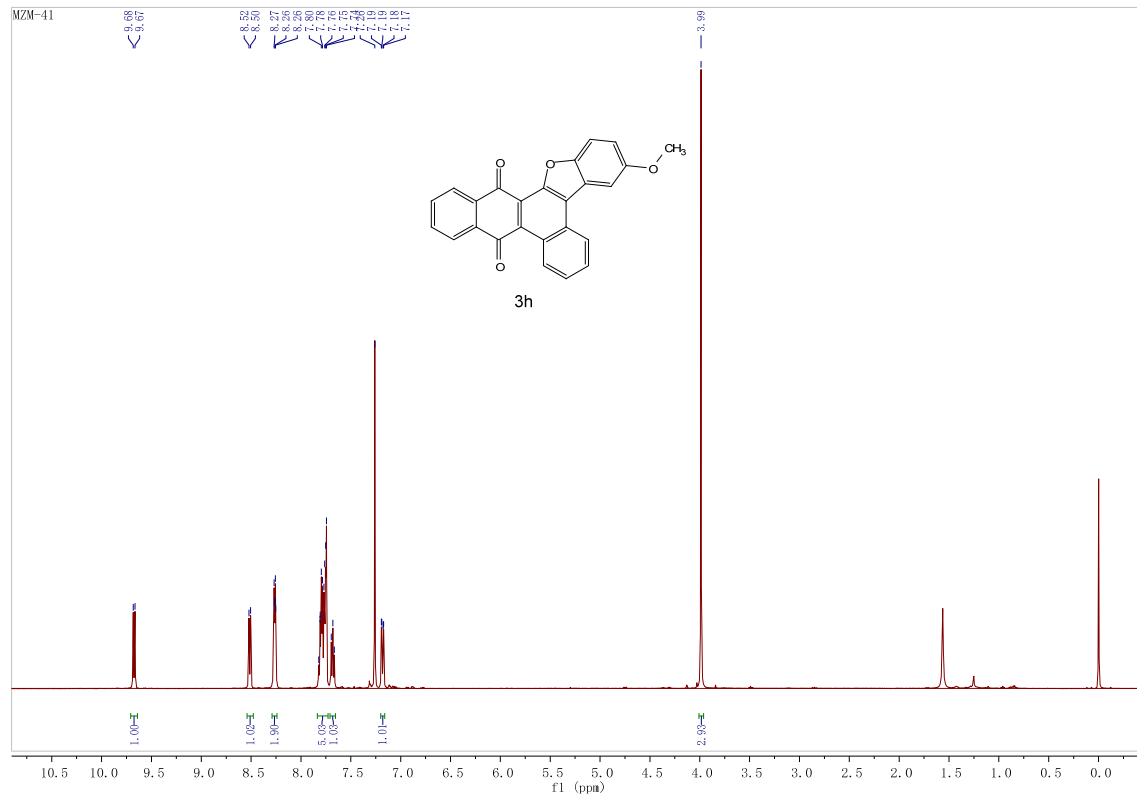

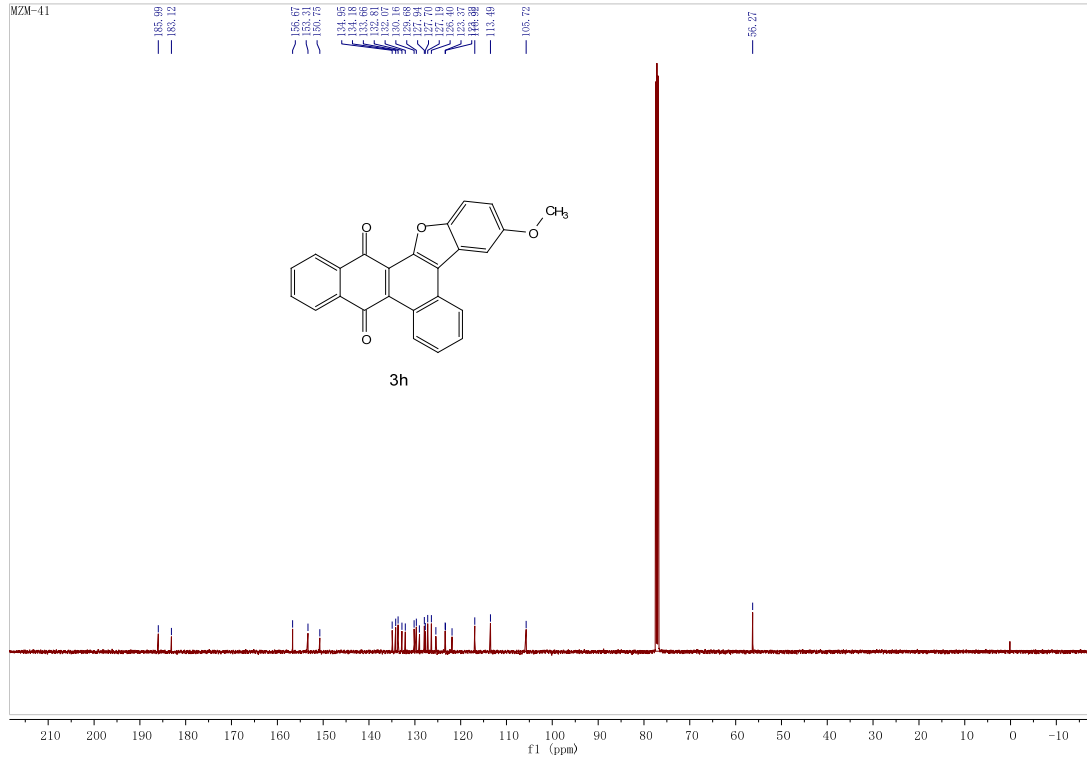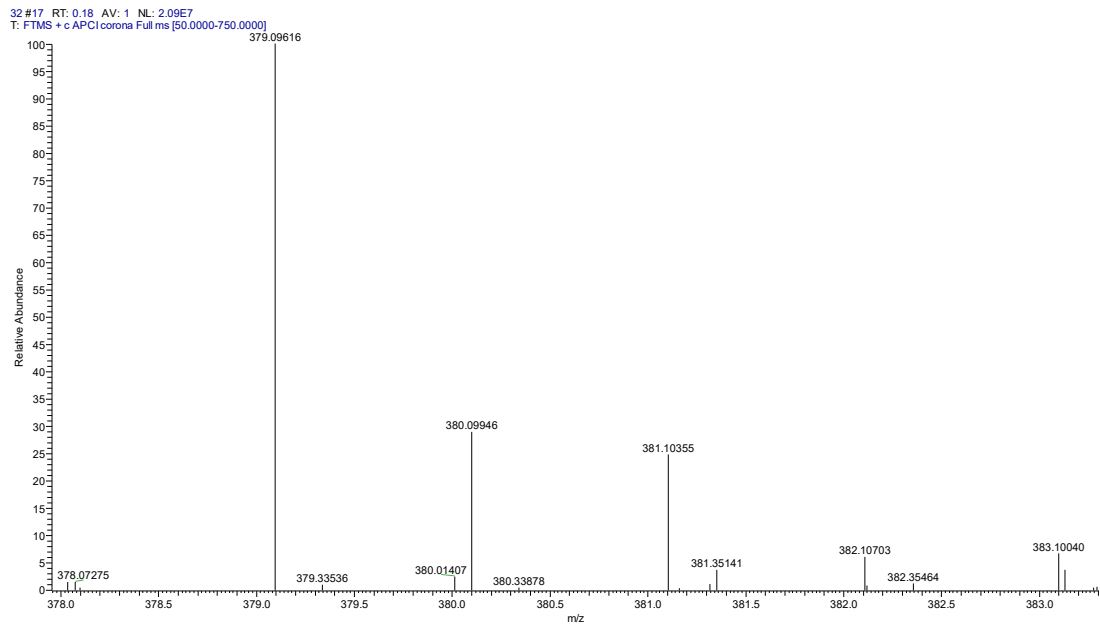

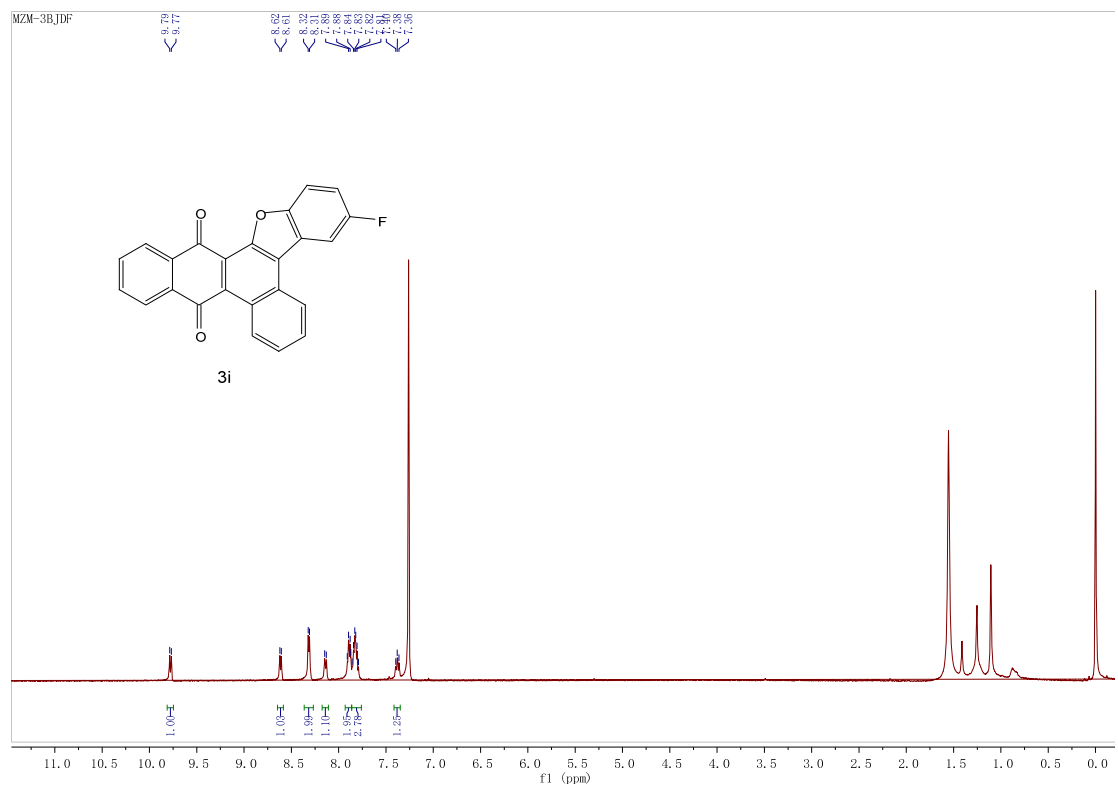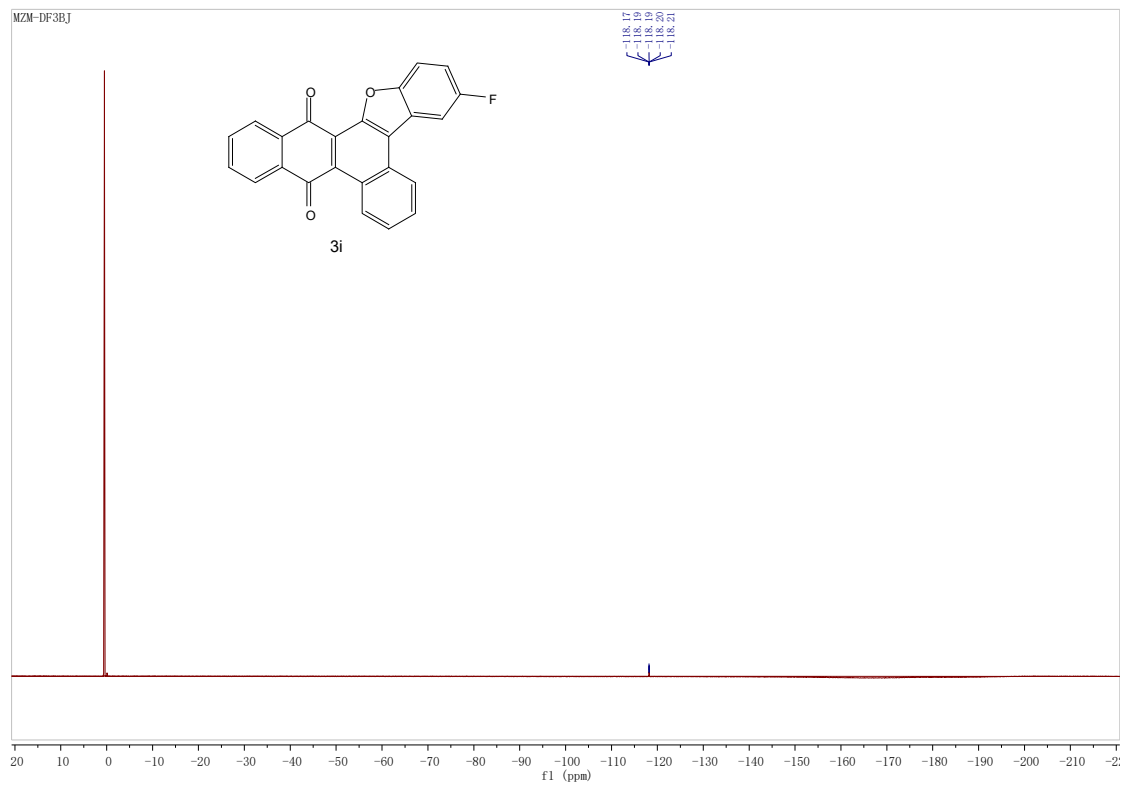

33 #17 RT: 0.18 AV: 1 NL: 8.93E6  
T: FTMS + c APCI corona Full ms [50.0000-750.0000]

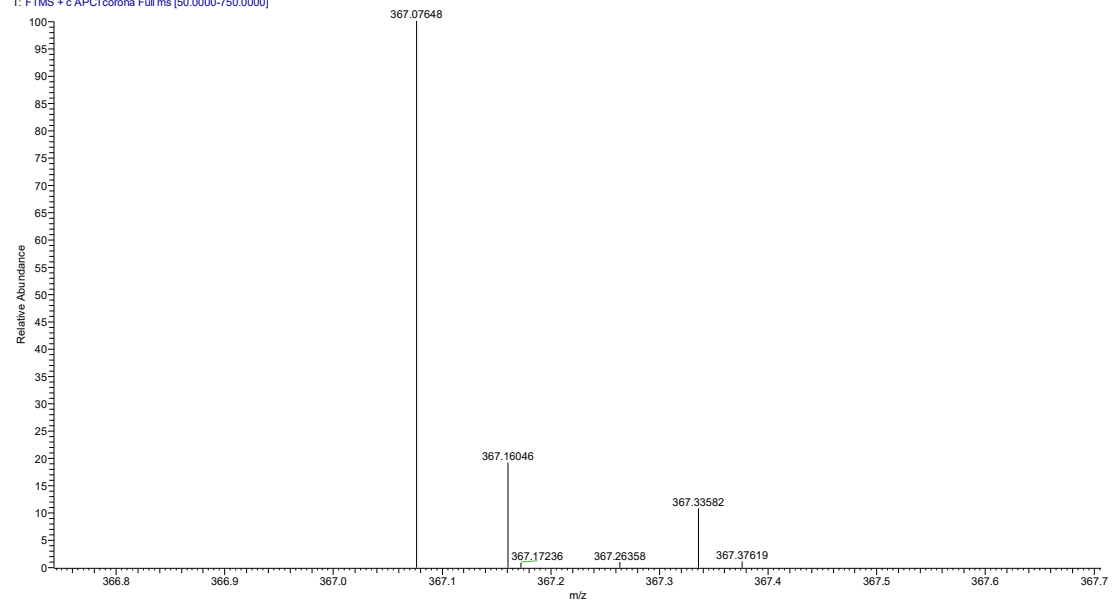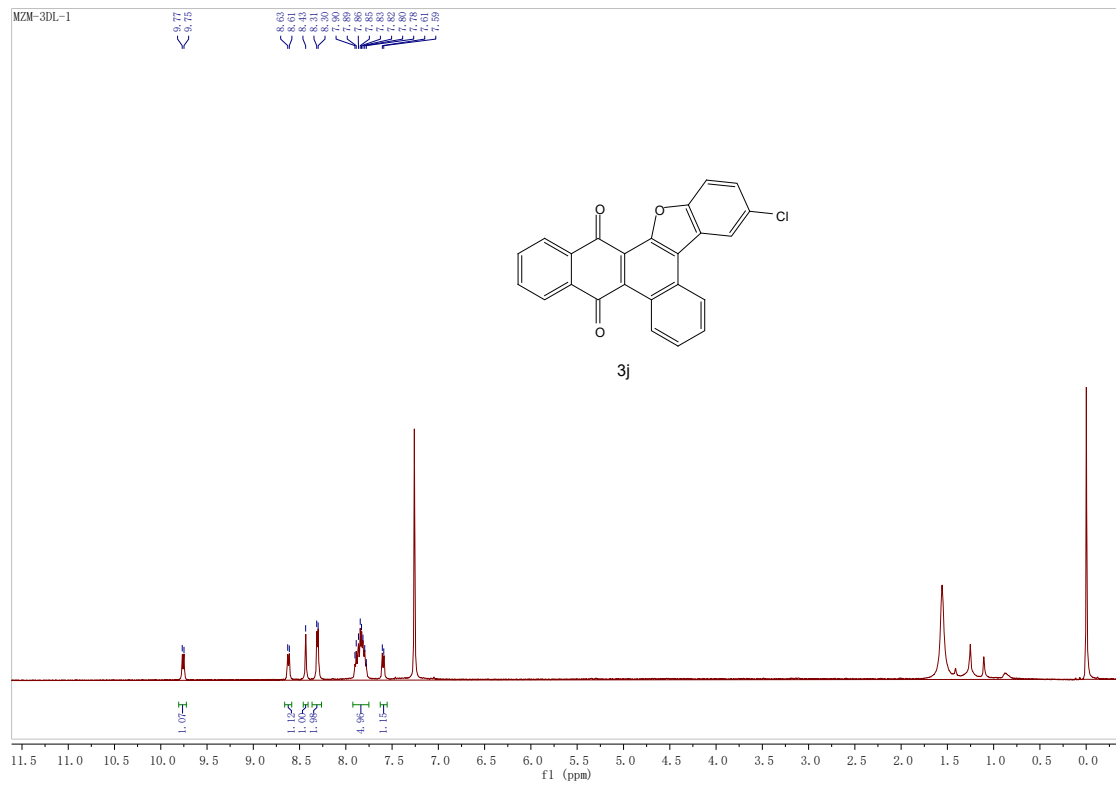

34 #15 RT: 0.17 AV: 1 NL: 1.03E7  
T: FTMS + cAPCI corona Full ms [50.0000-750.0000]

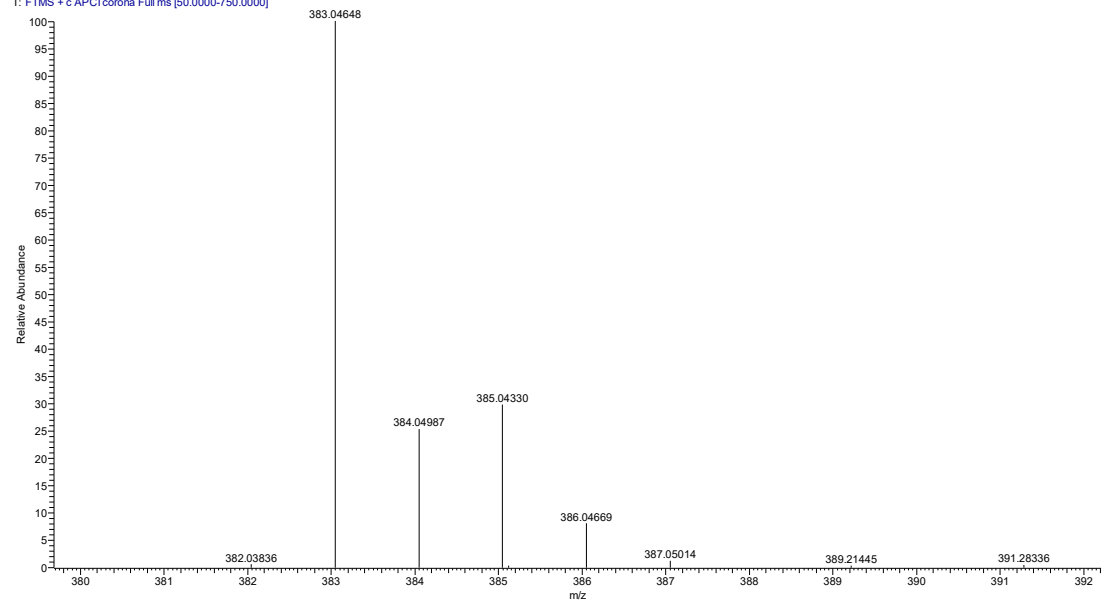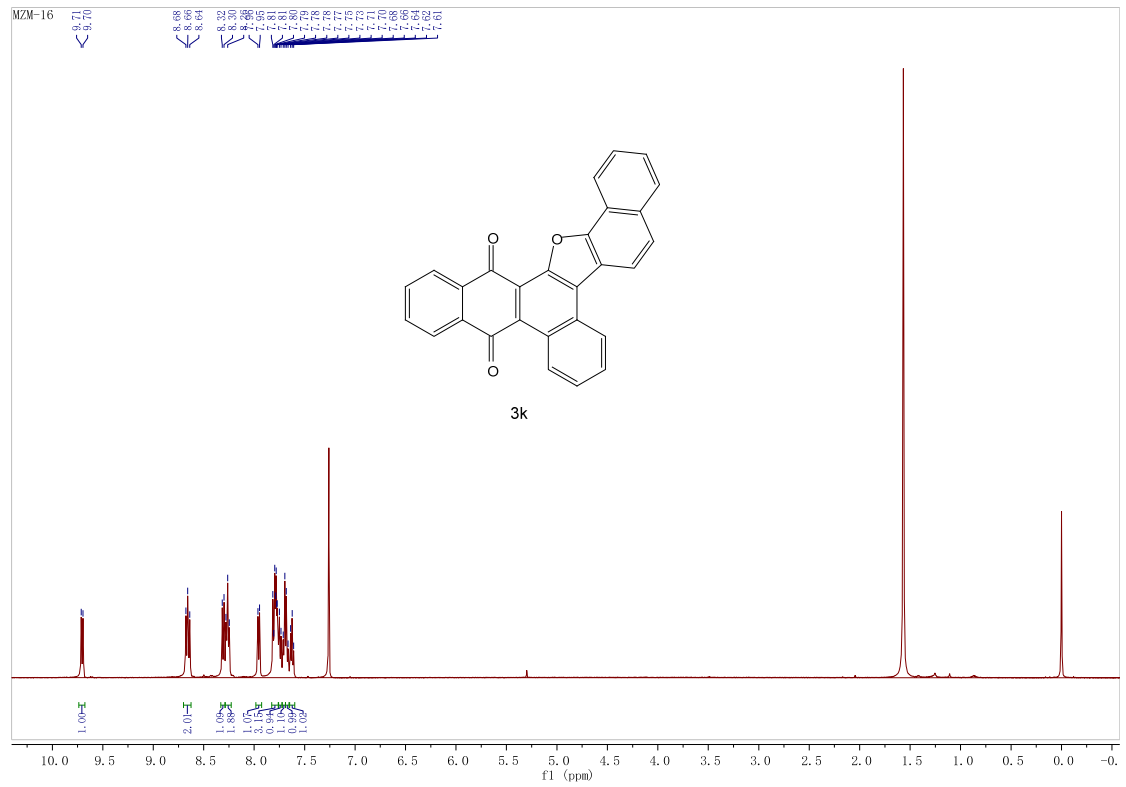

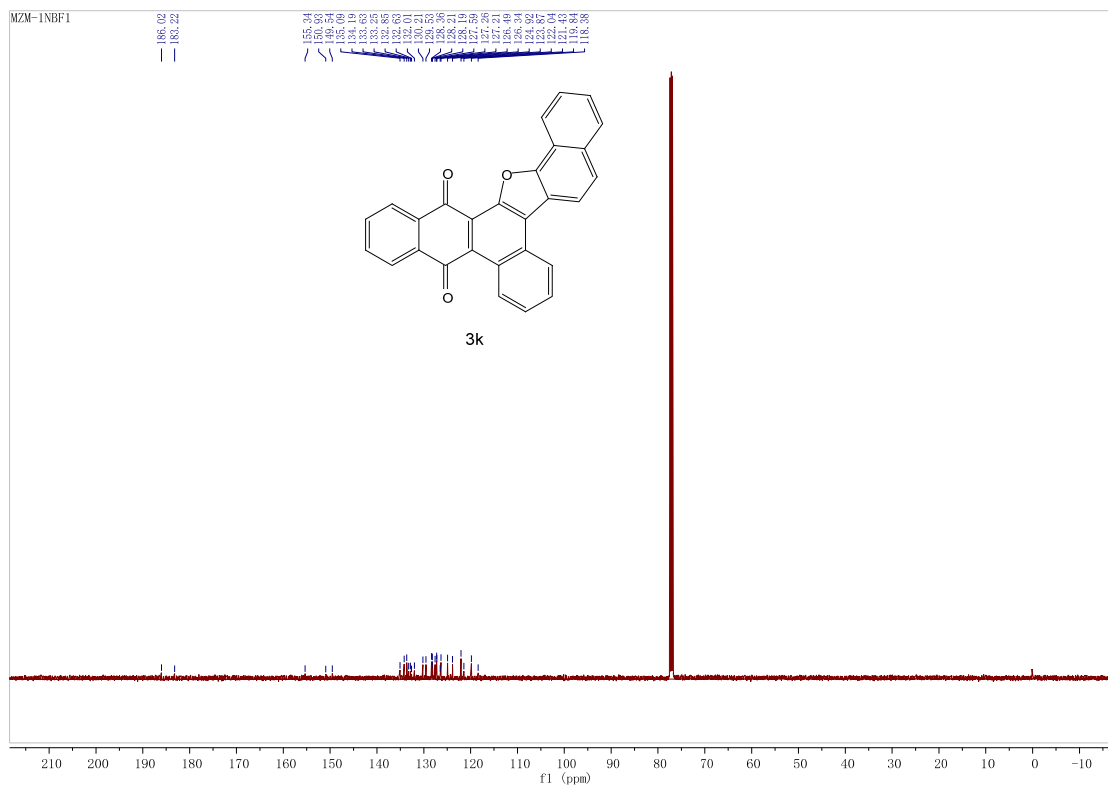

35#15 RT: 0.17 AV: 1 NL: 9.98E6  
T: FTMS + cAPCI corona Full ms [50.0000-750.0000]

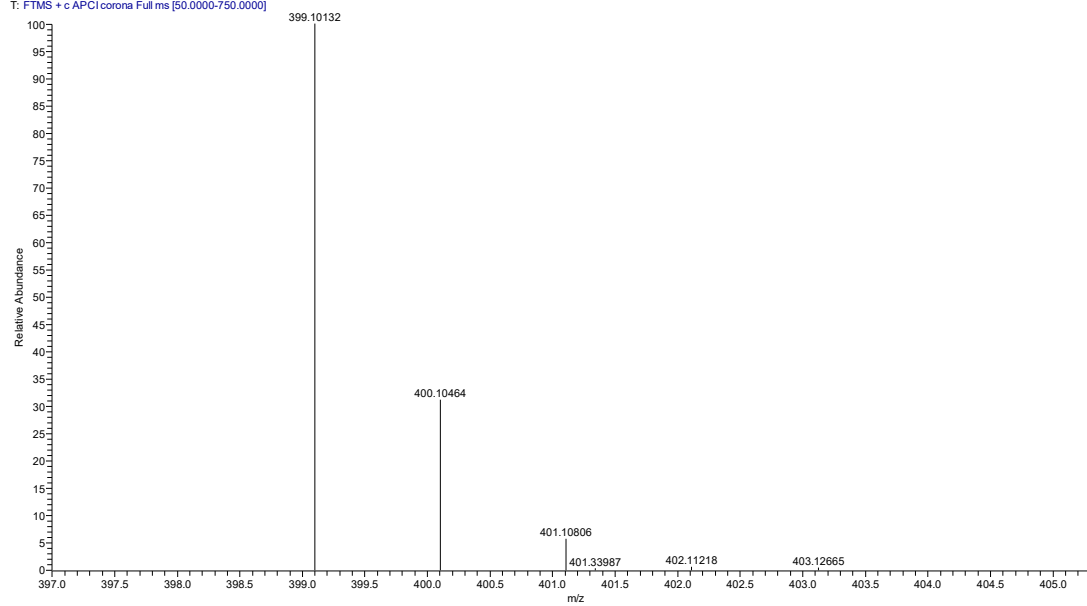





36 #15 RT: 0.17 AV: 1 NL: 6.02E6  
T: FTMS + c APCI corona Full ms [50.0000-750.0000]

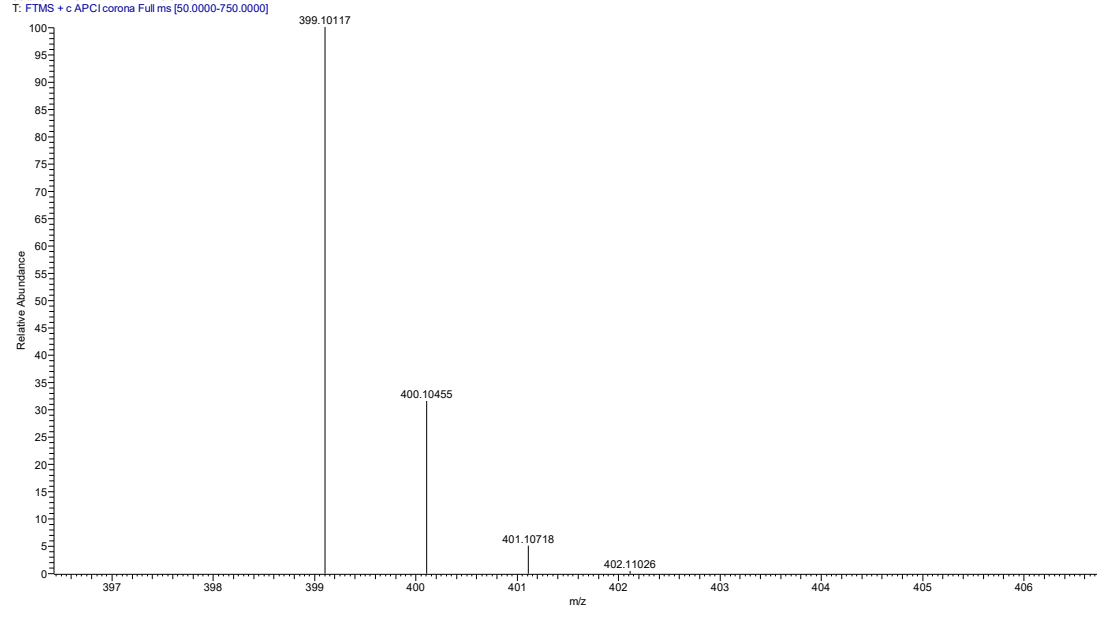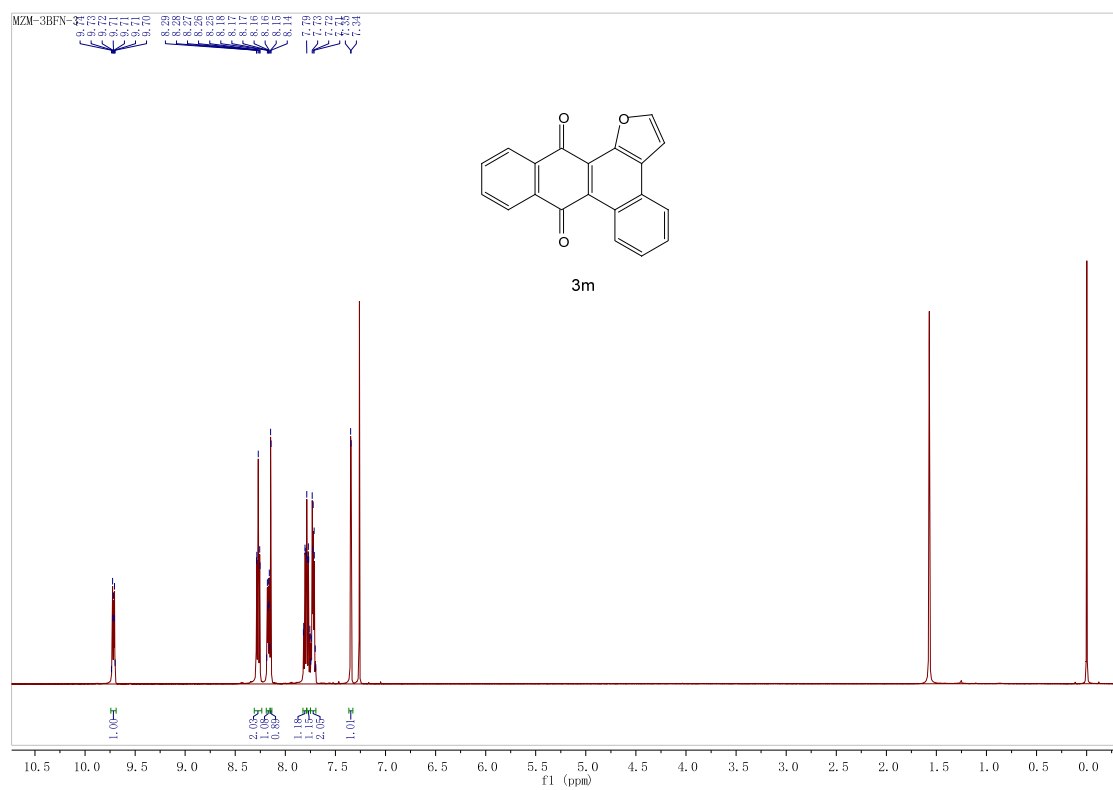

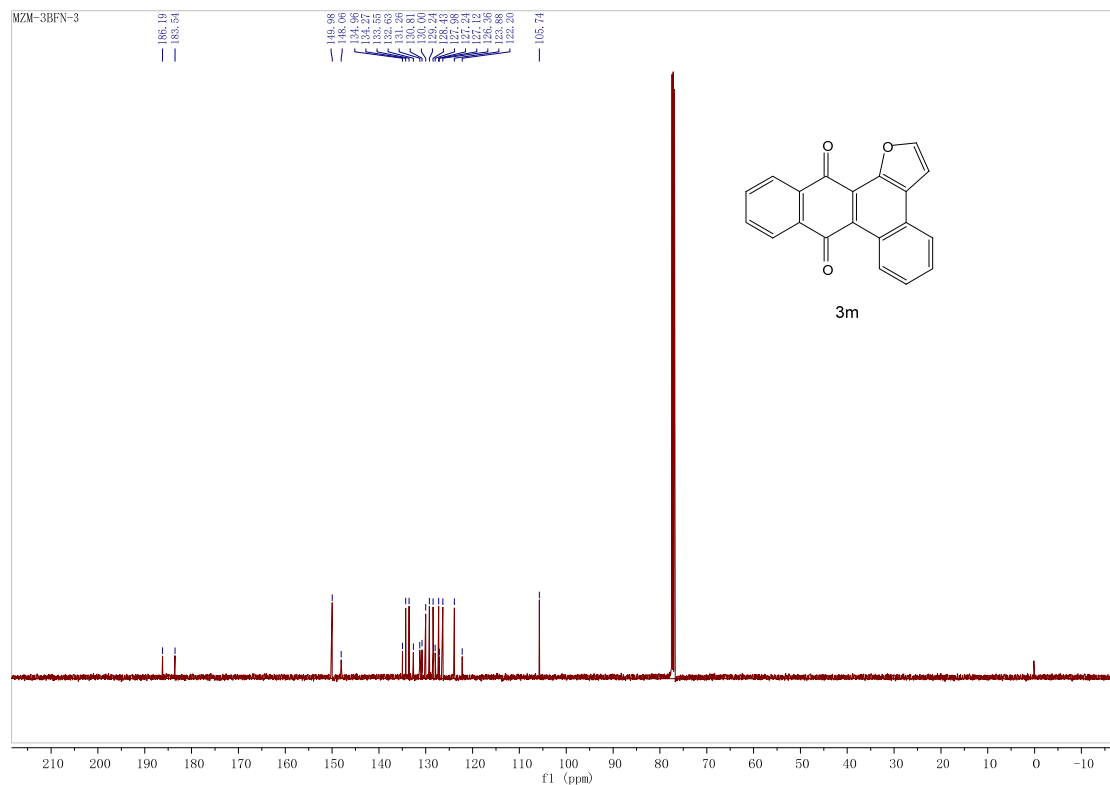

45 #15 RT: 0.16 AV: 1 NL: 1.46E8  
 T: FTMS + c-APCI corona Full ms [50.0000-750.0000]

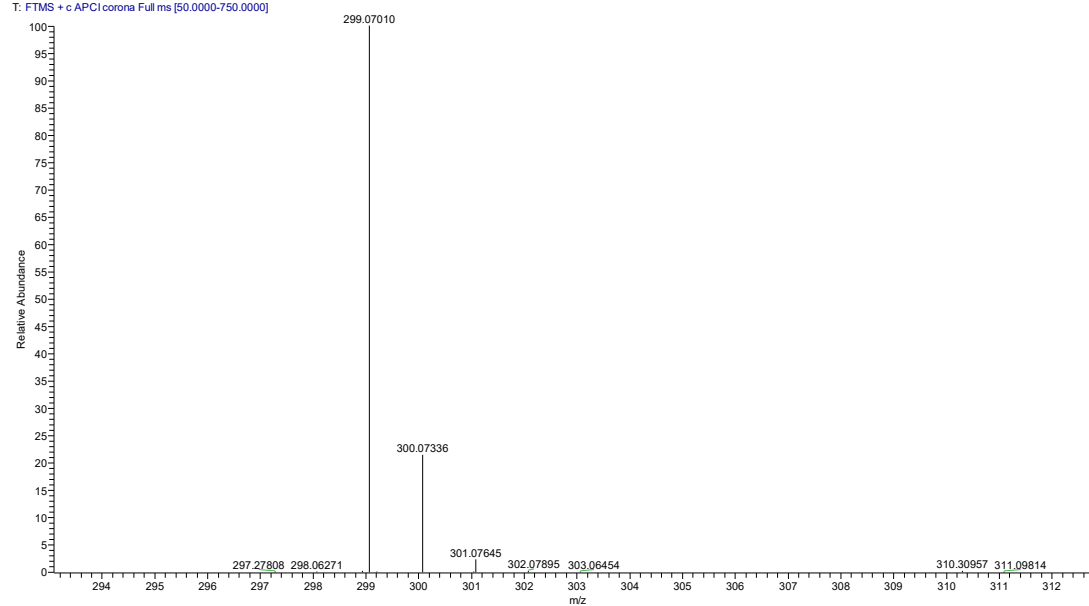

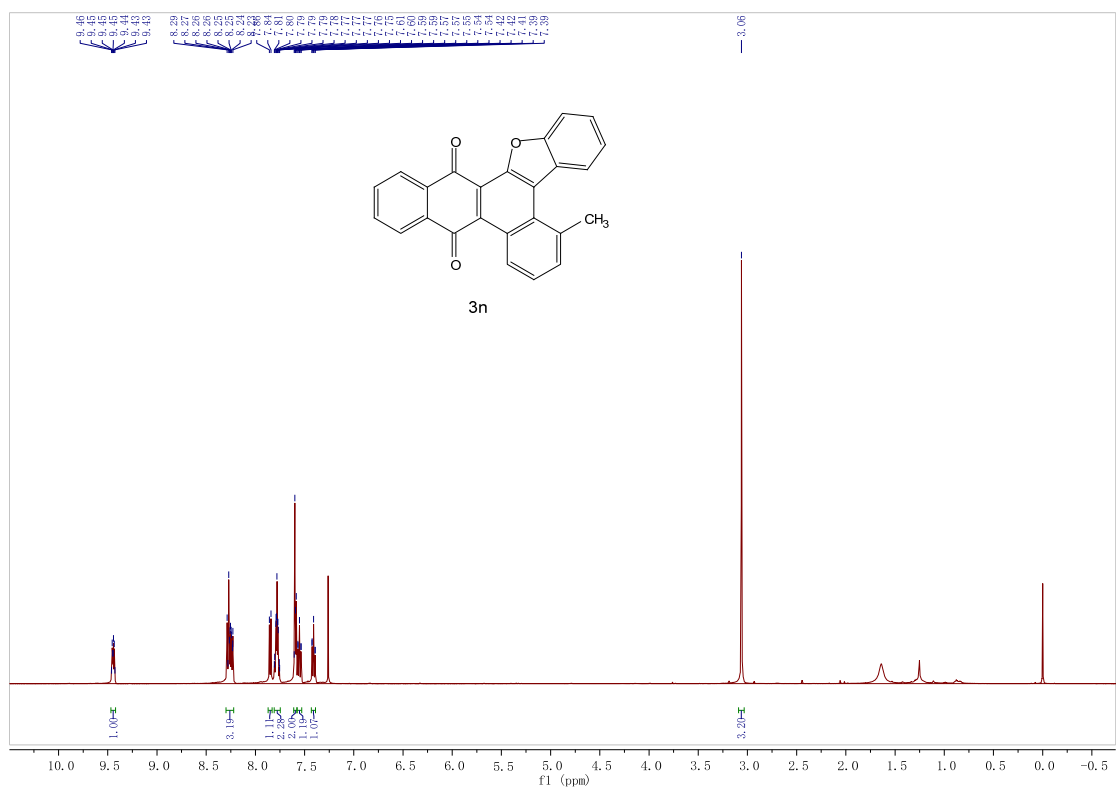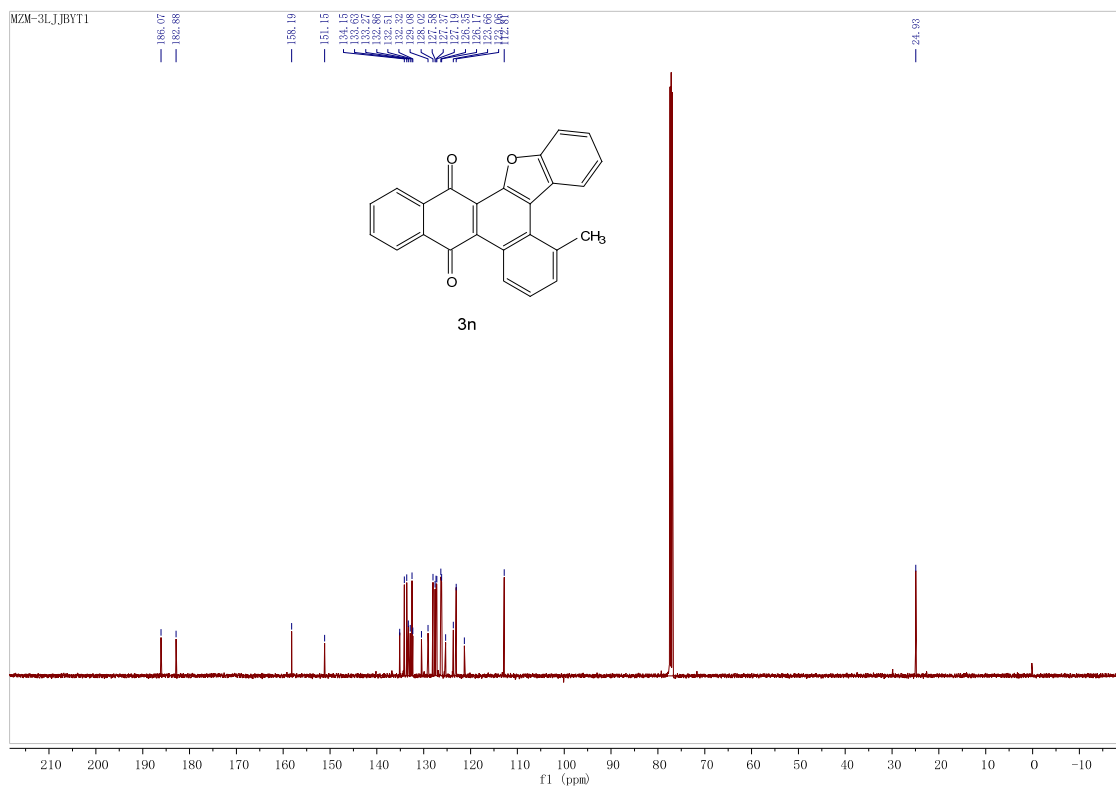

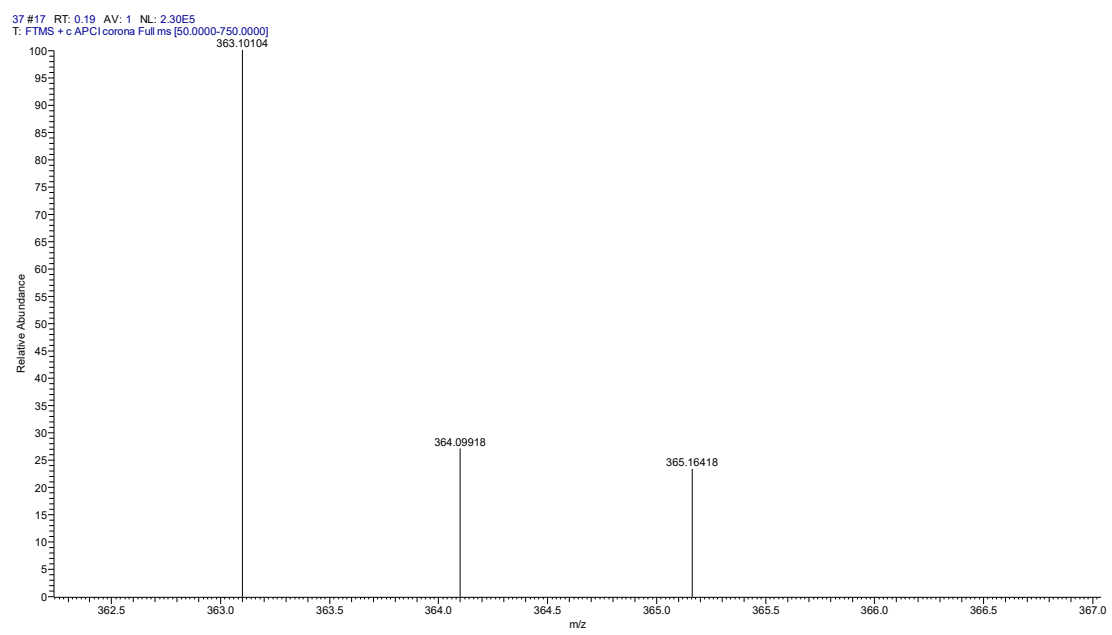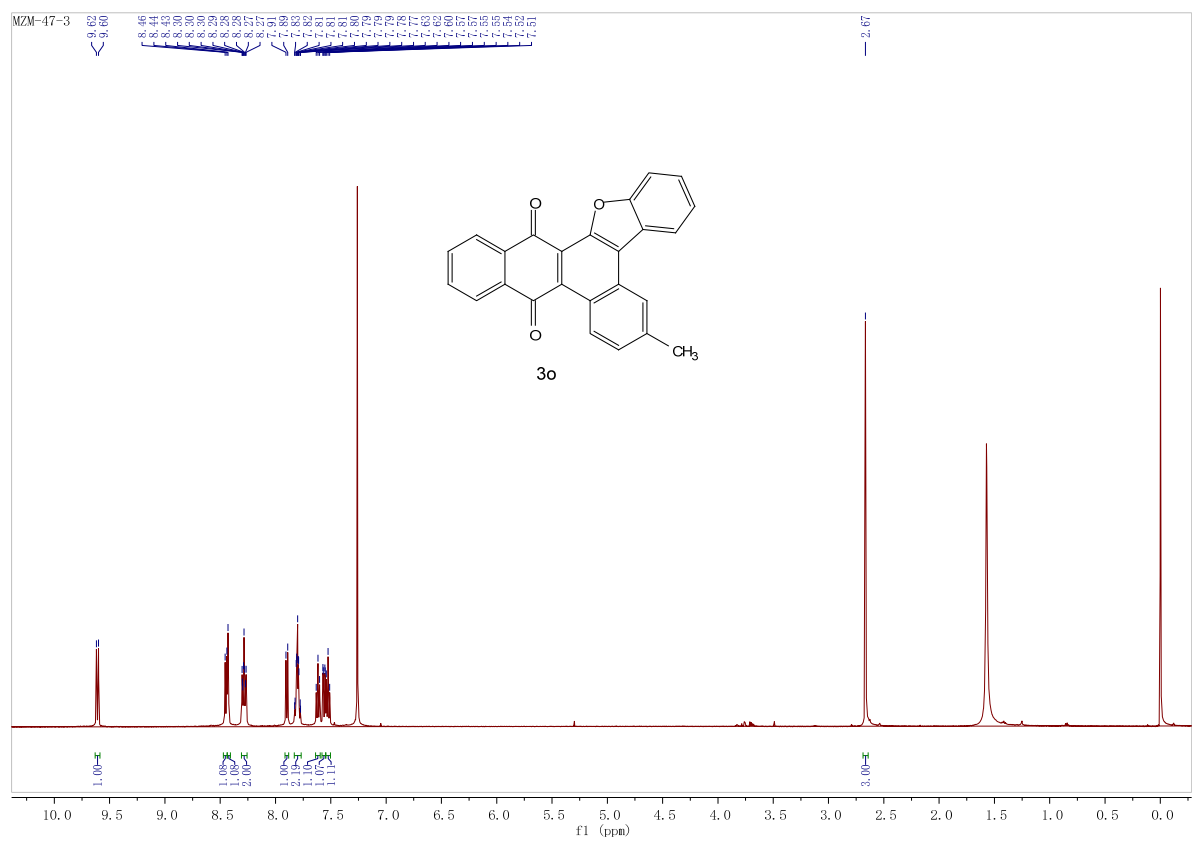

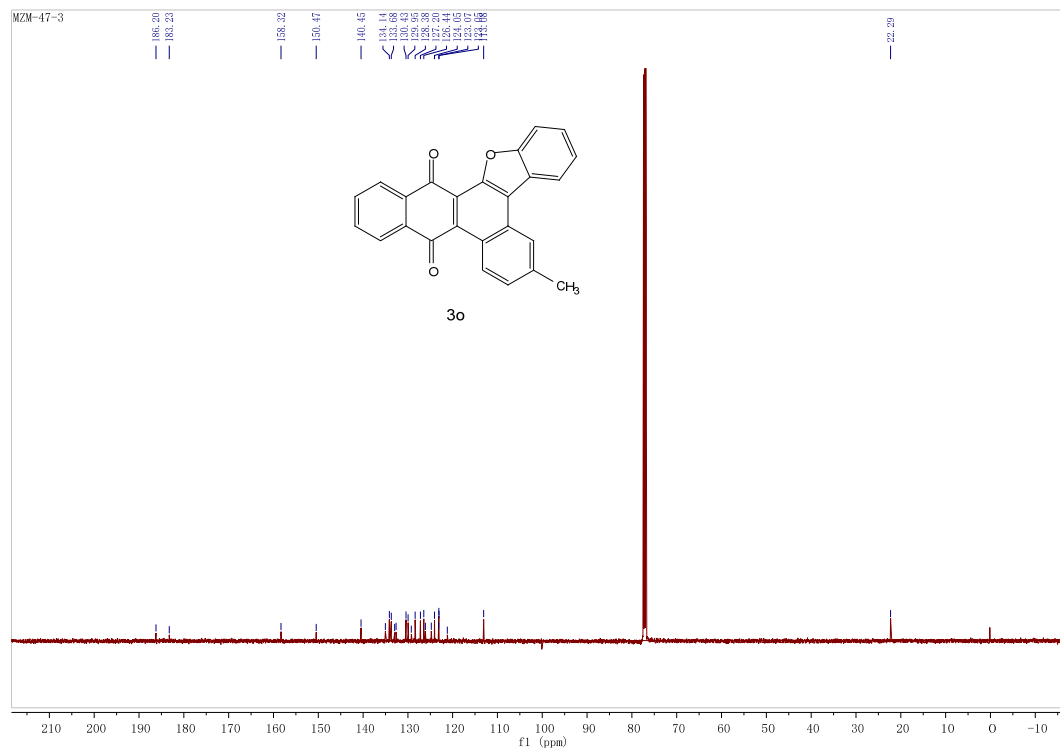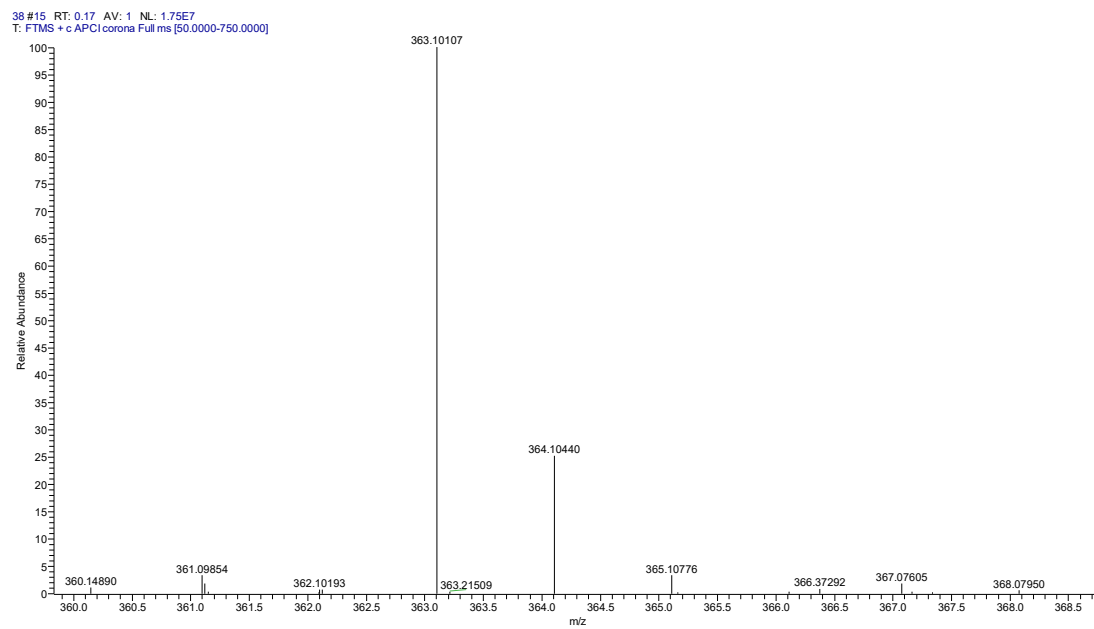

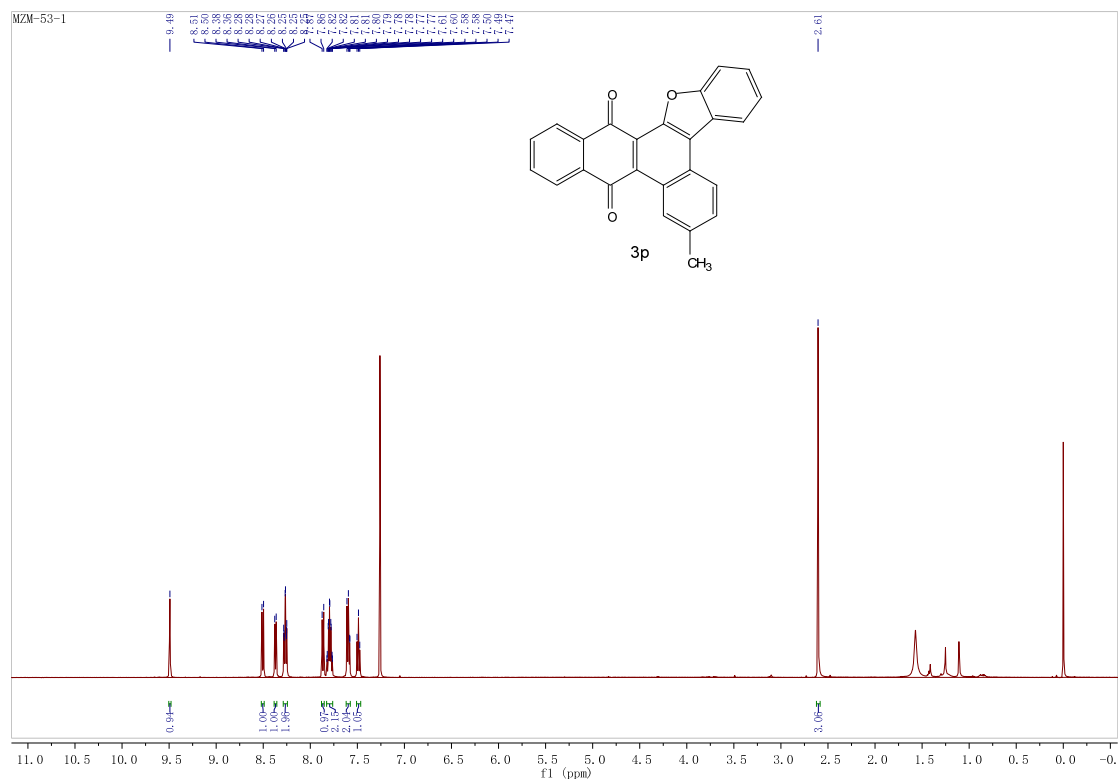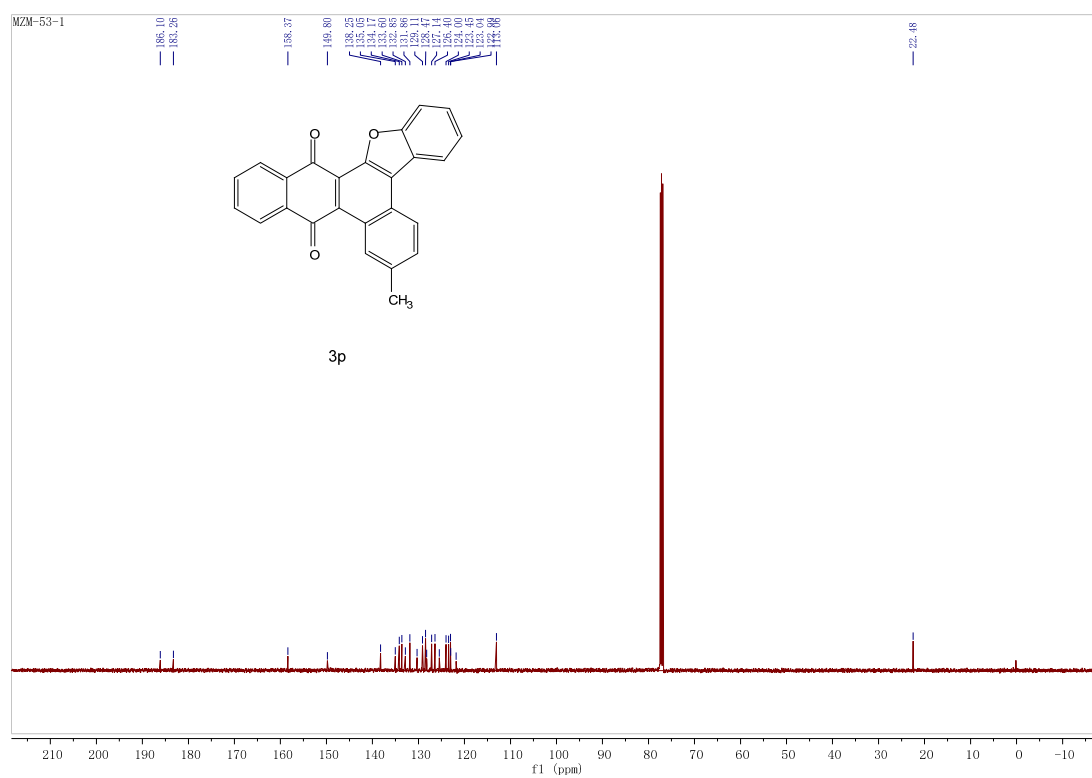

39 #15 RT: 0.17 AV: 1 NL: 2.97E7  
T: FTMS + c APCI corona Full ms [50.0000-750.0000]

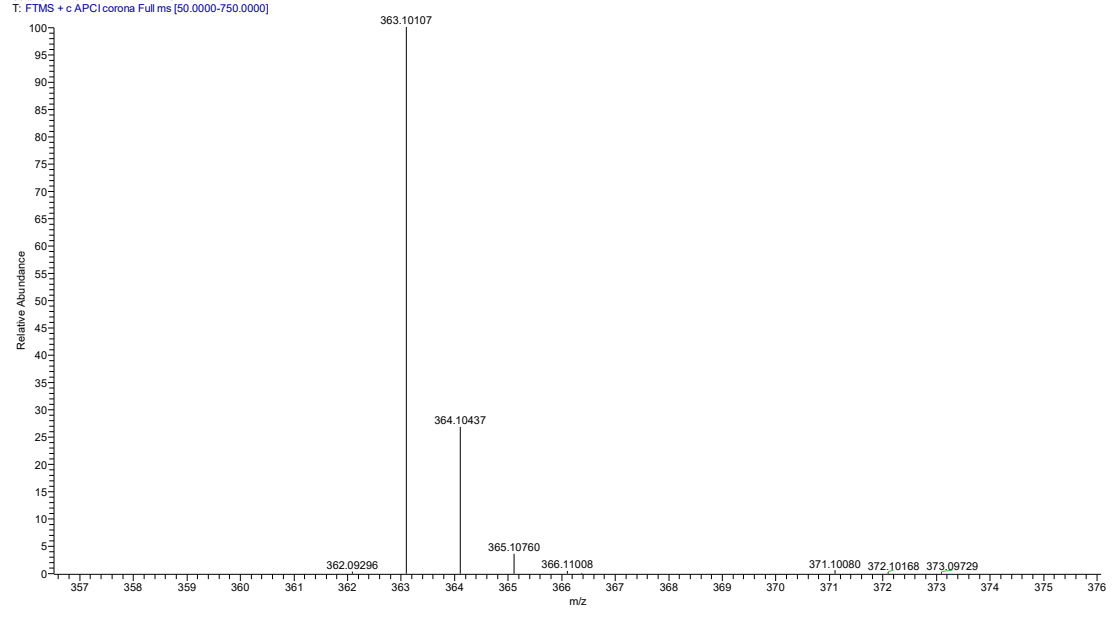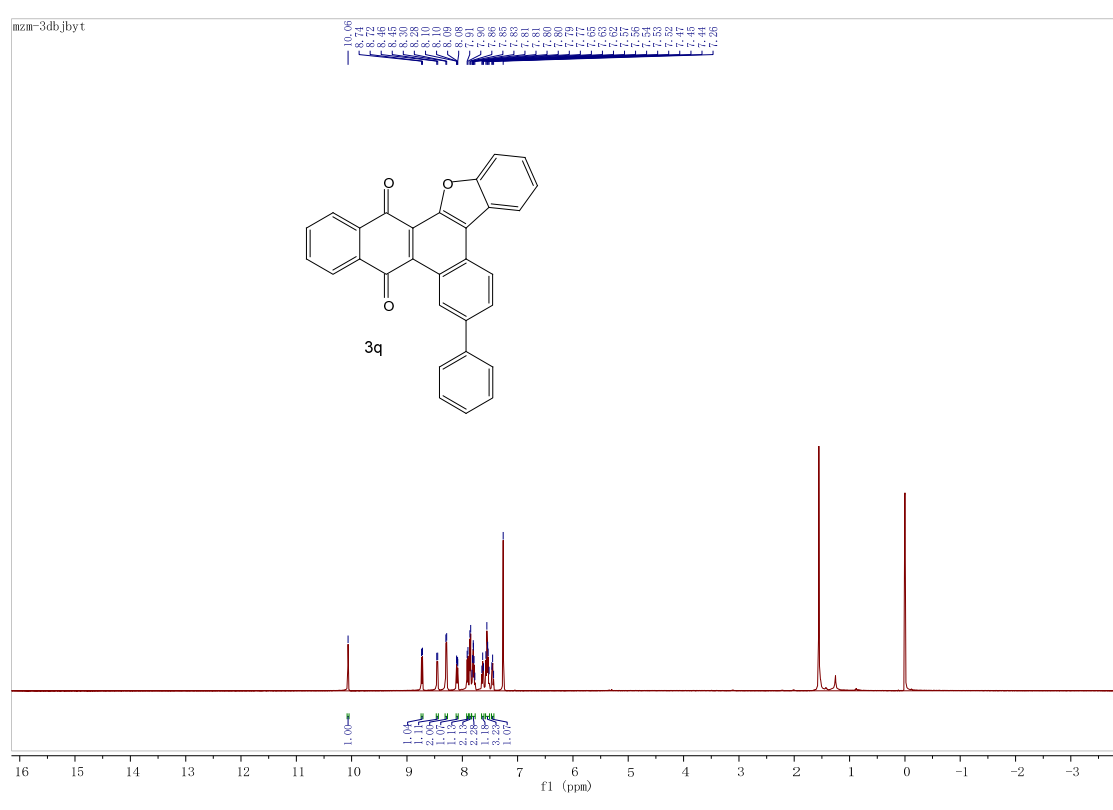

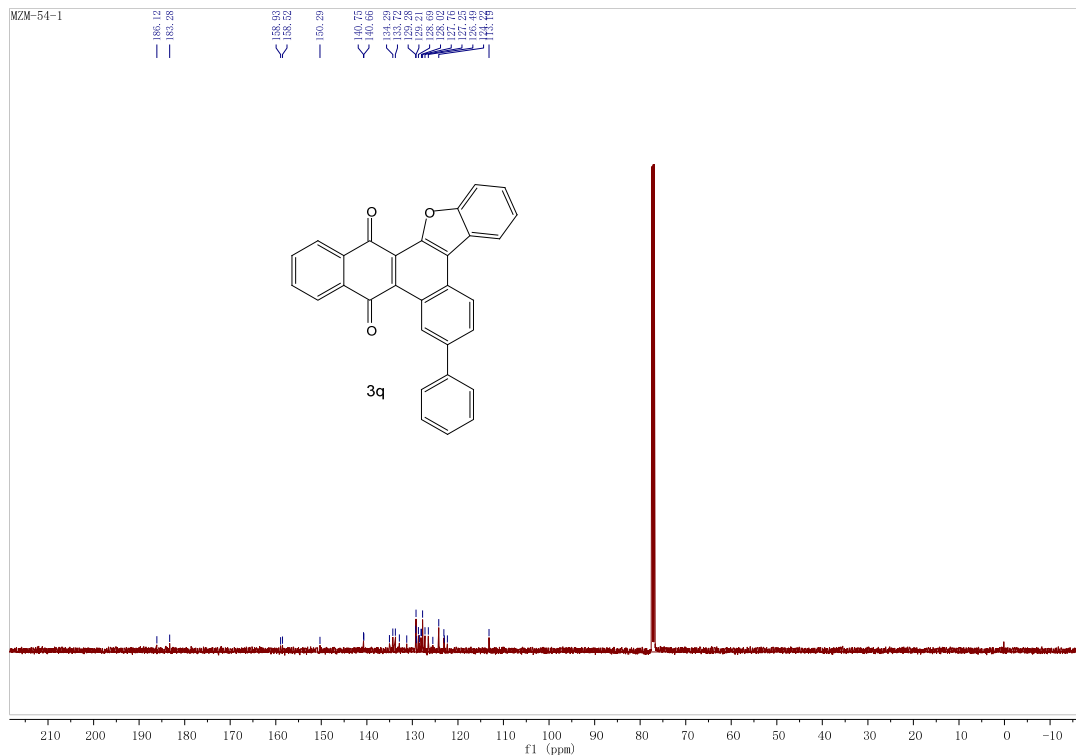

40 #15 RT: 0.16 AV: 1 NL: 4.81E7  
T: FTMS + c APCI corona Full ms [50.0000-750.0000]

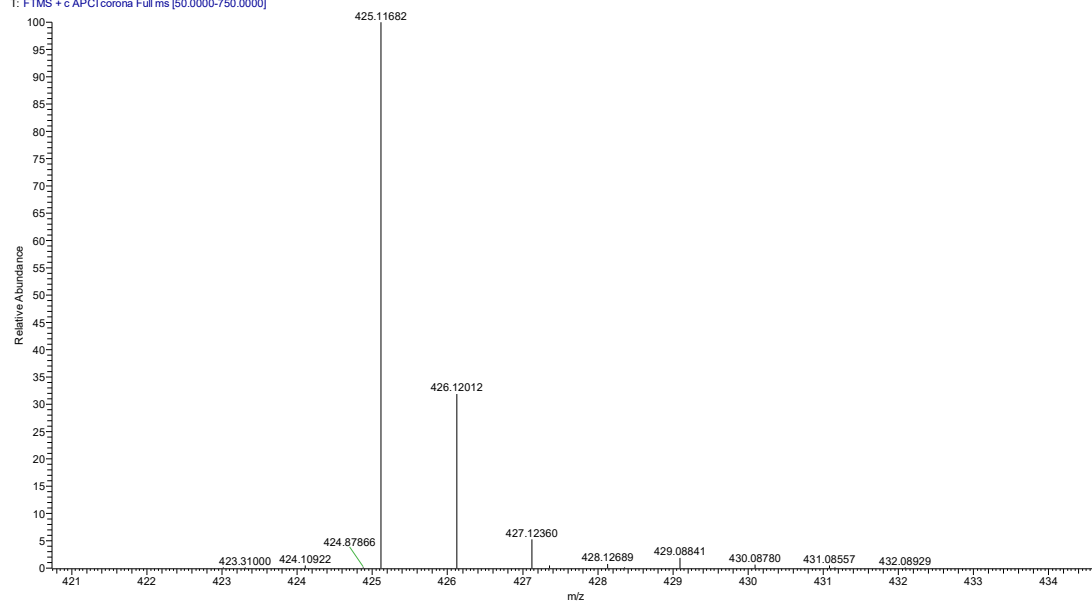



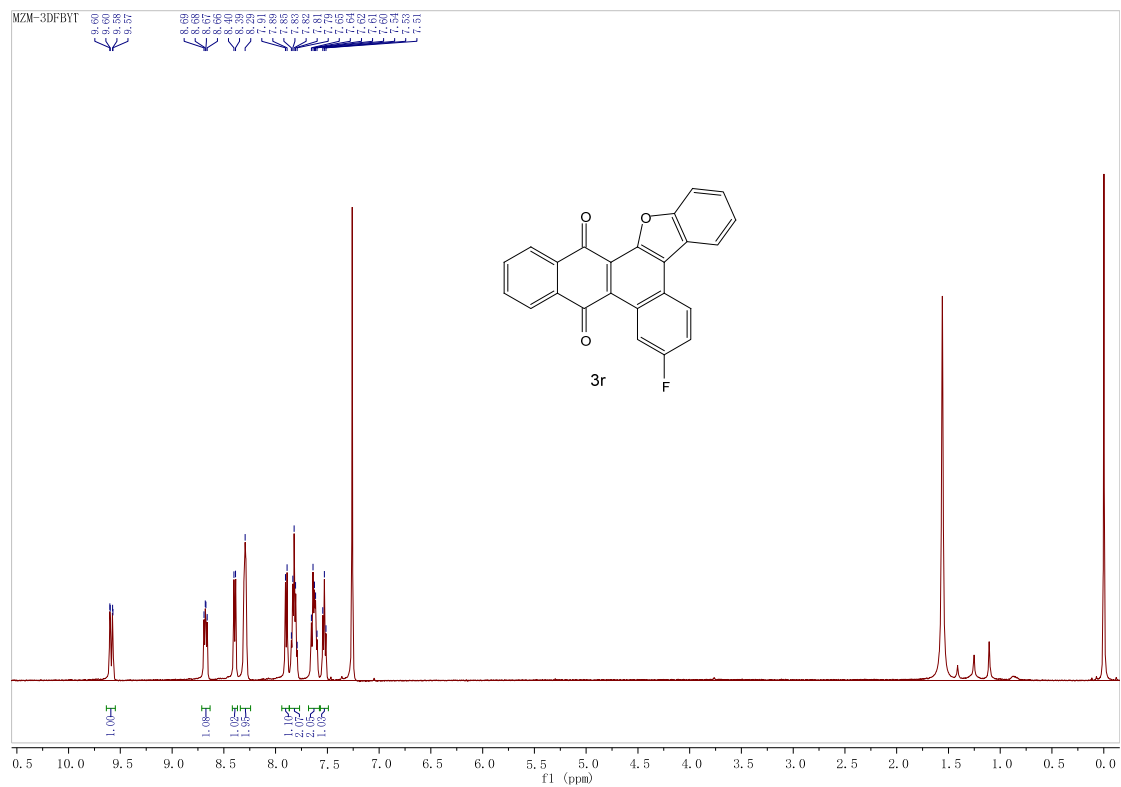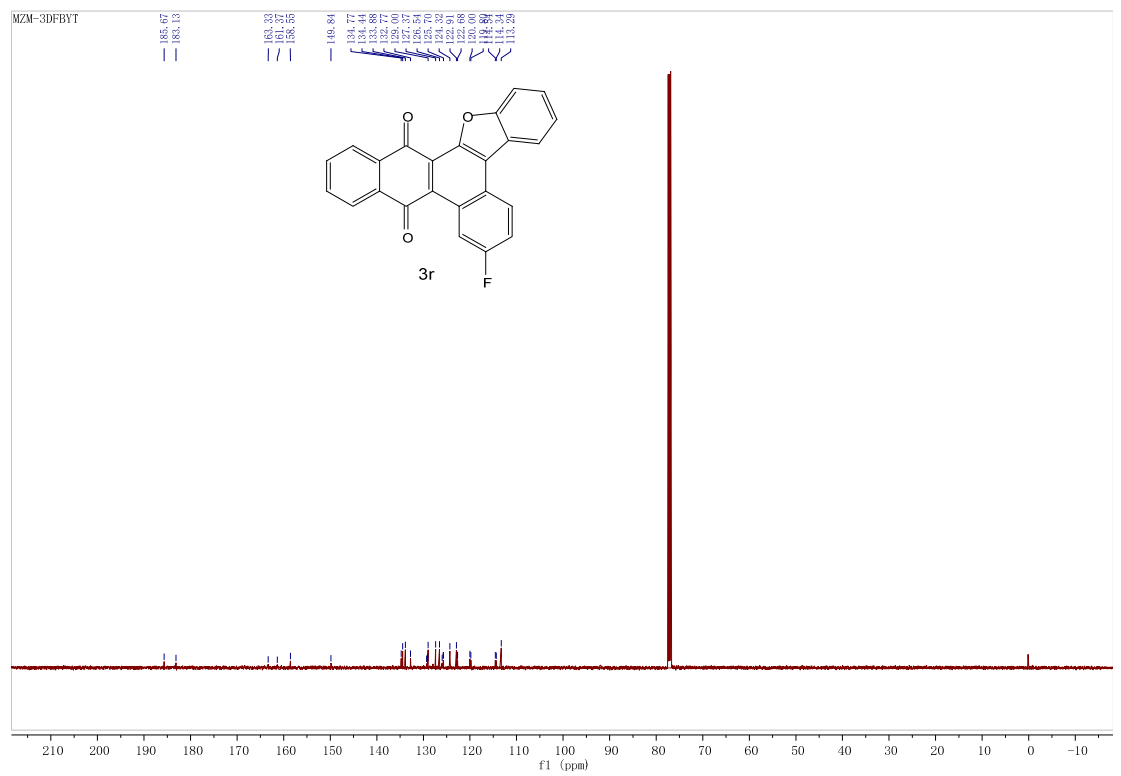

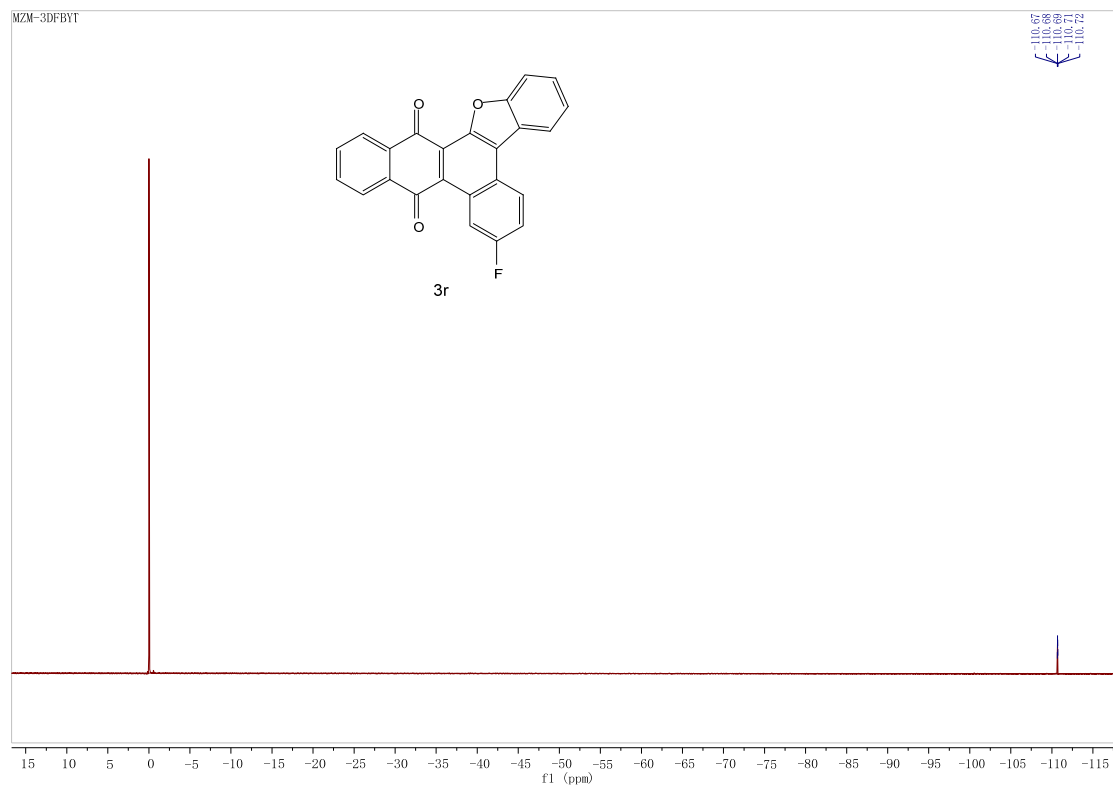

41 #15 RT: 0.16 AV: 1 NL: 1.03E8  
 T: FTMS + c.APCI corona Full ms [50.0000-750.0000]

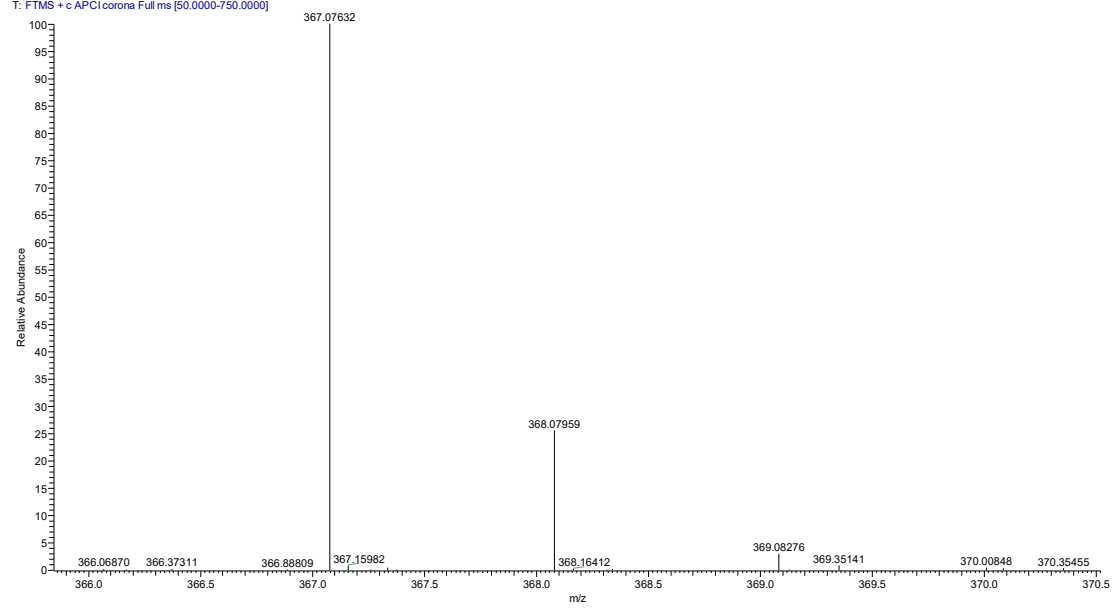

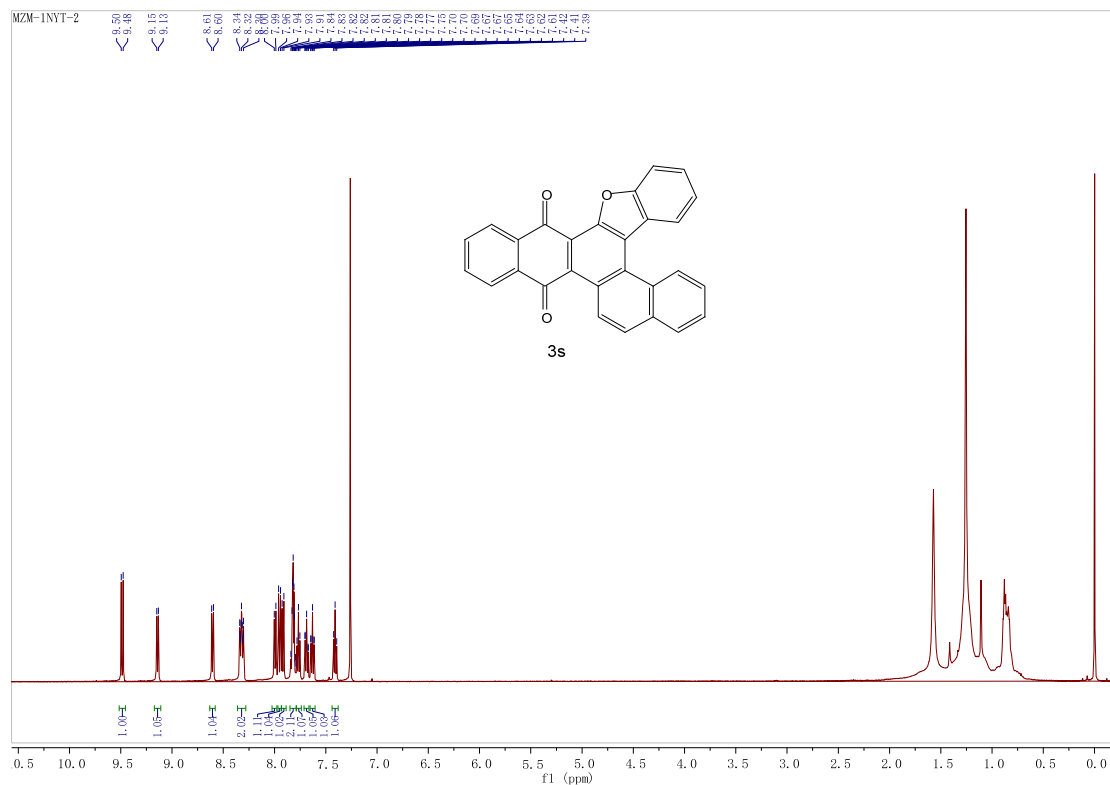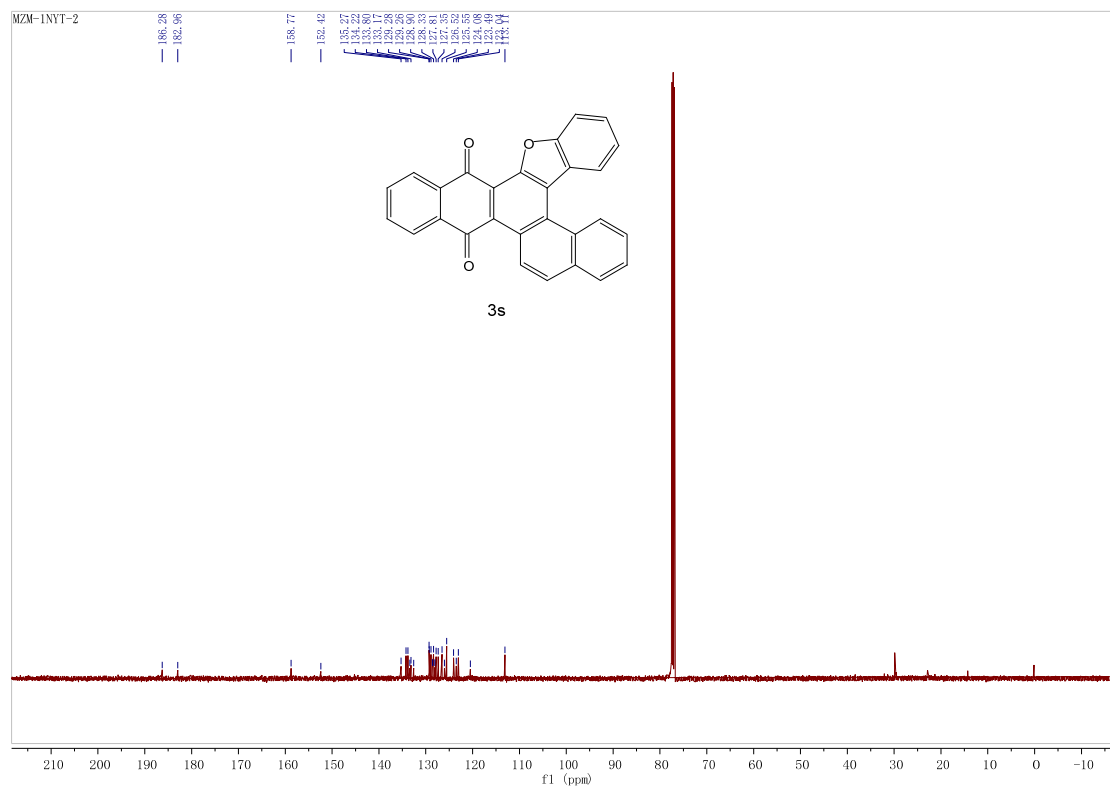

42 #15 RT: 0.16 AV: 1 NL: 9.41E7  
T: FTMS + cAPCI corona Full ms [50.0000-750.0000]

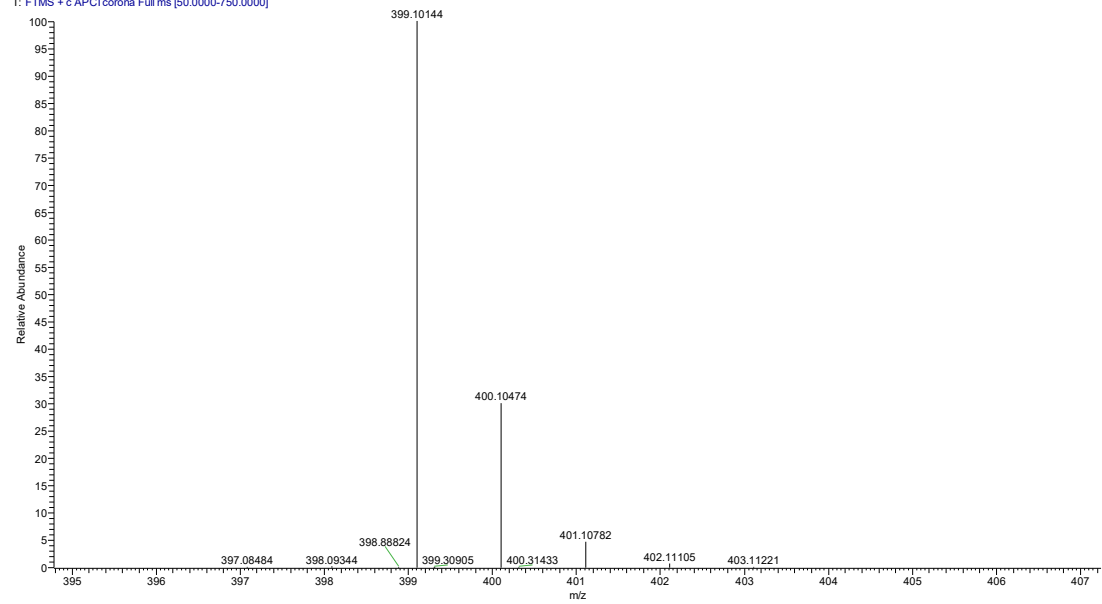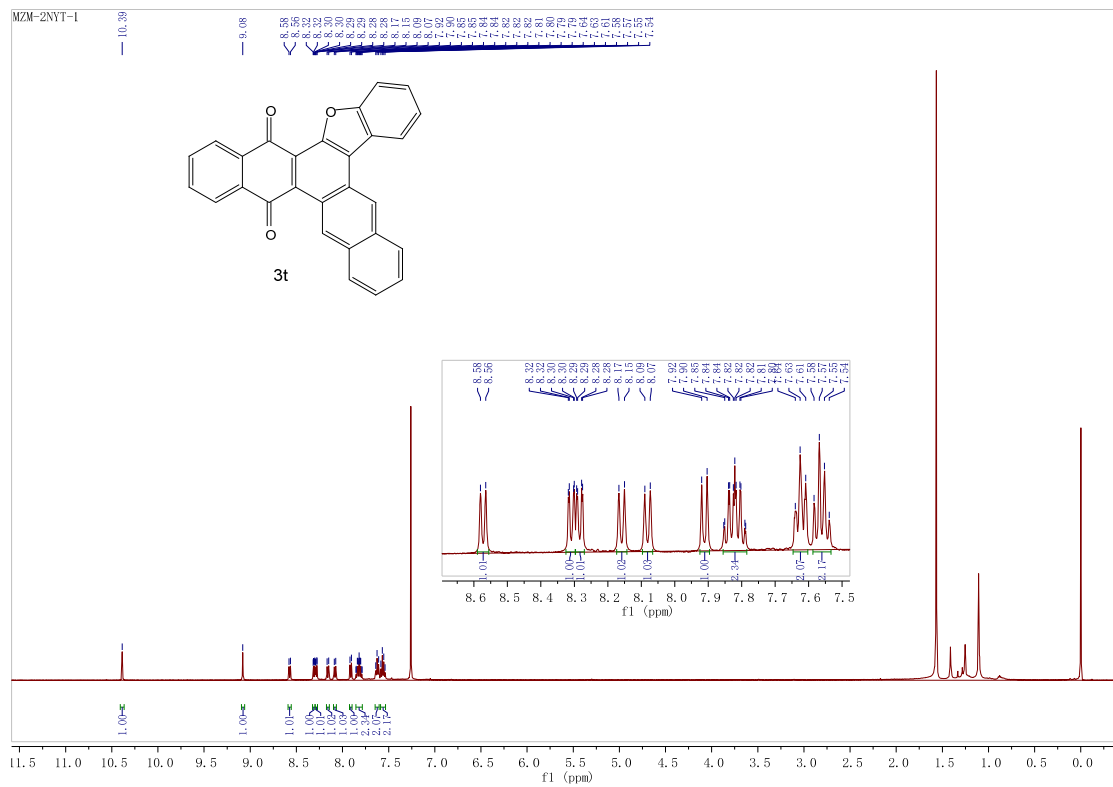

43 #15 RT: 0.17 AV: 1 NL: 1.00E7  
T: FTMS + c APCI corona Full ms [50.0000-750.0000]

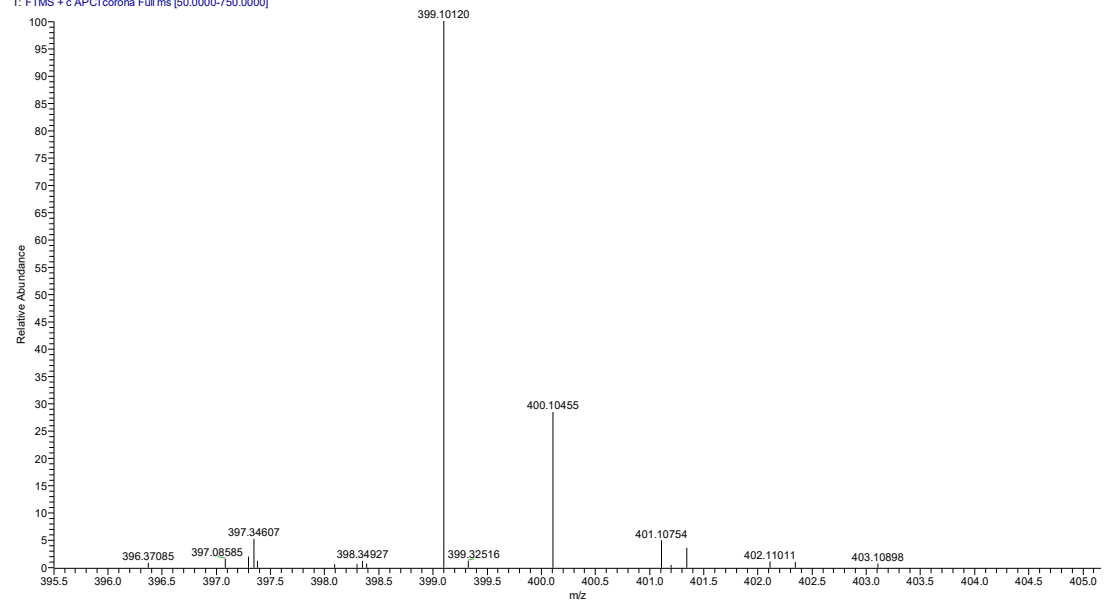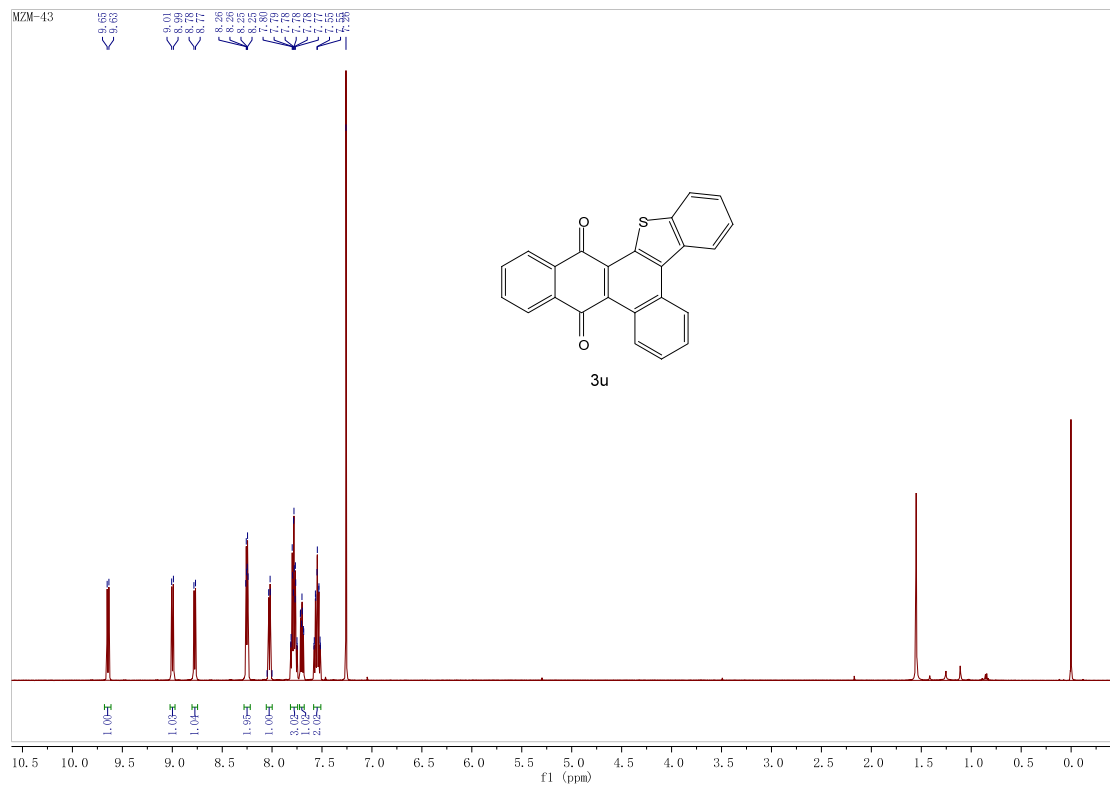

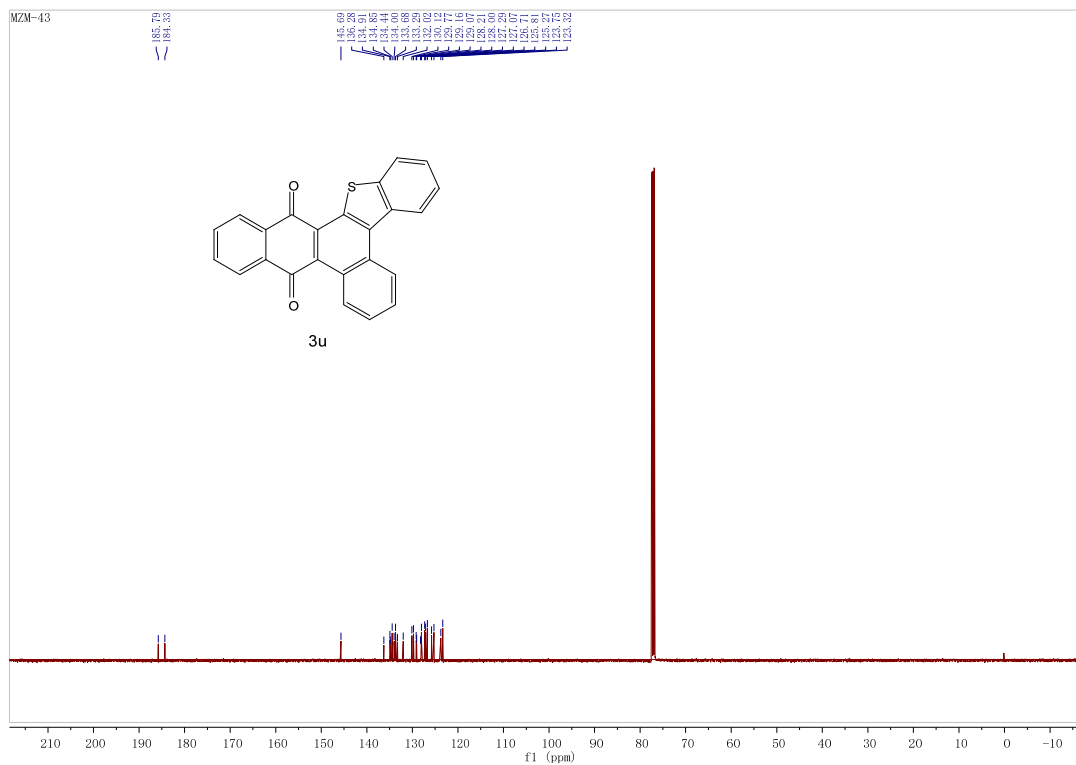

44 #15 RT: 0.16 AV: 1 NL: 8.09E7

T: FTMS + c.APCI corona Full ms [50.0000-750.0000]

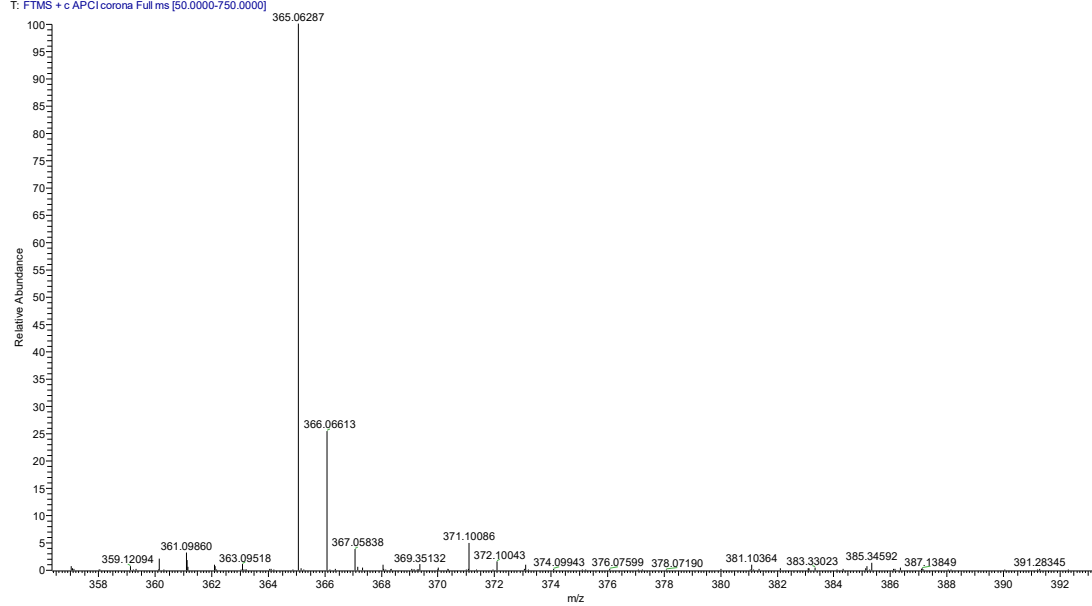

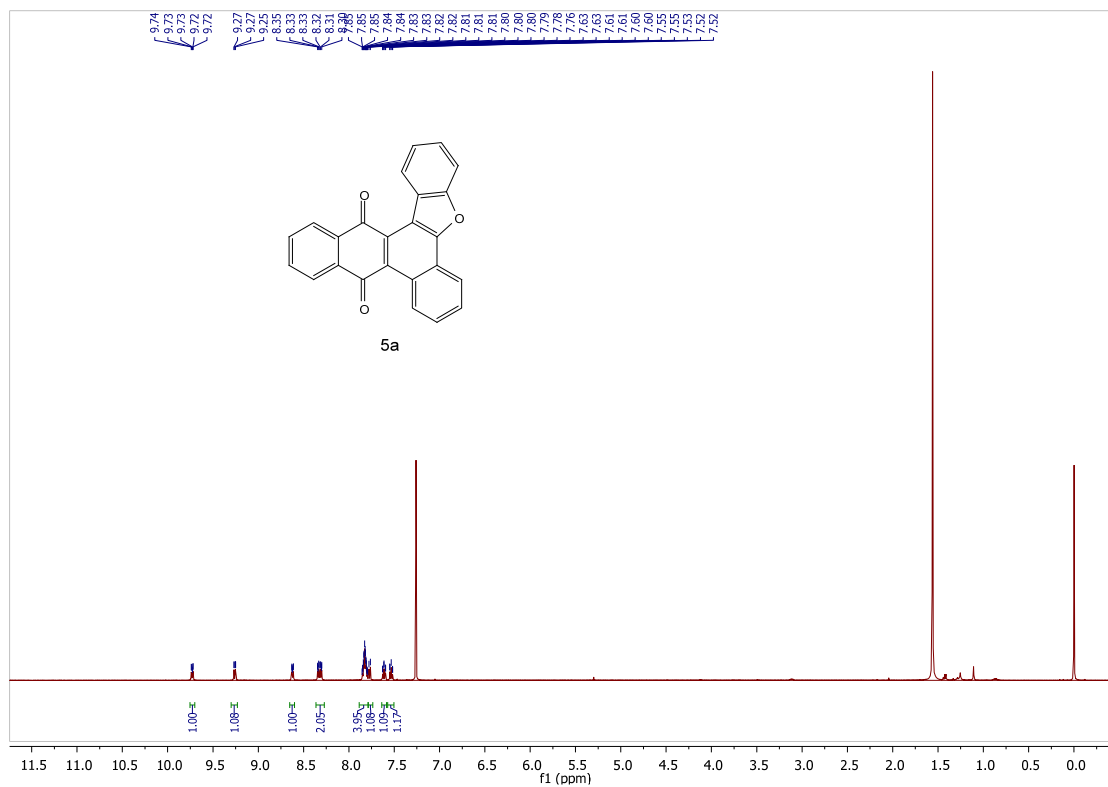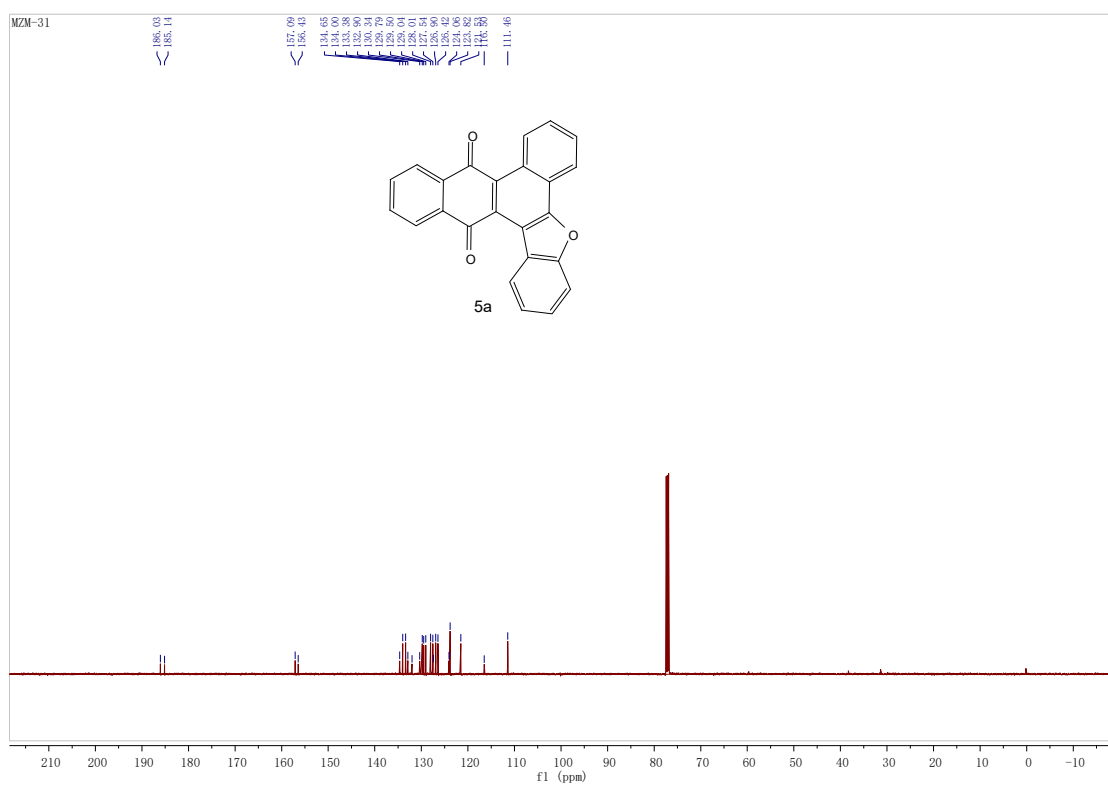

46 #15 RT: 0.16 AV: 1 NL: 8.42E7  
T: FTMS + c APCI corona Full ms [50.0000-750.0000]

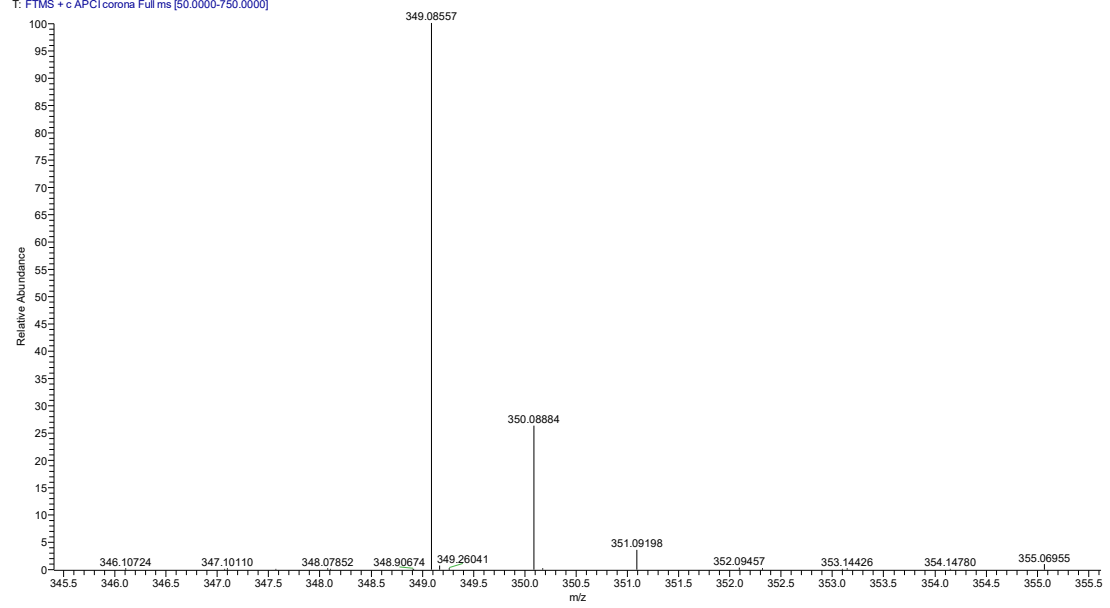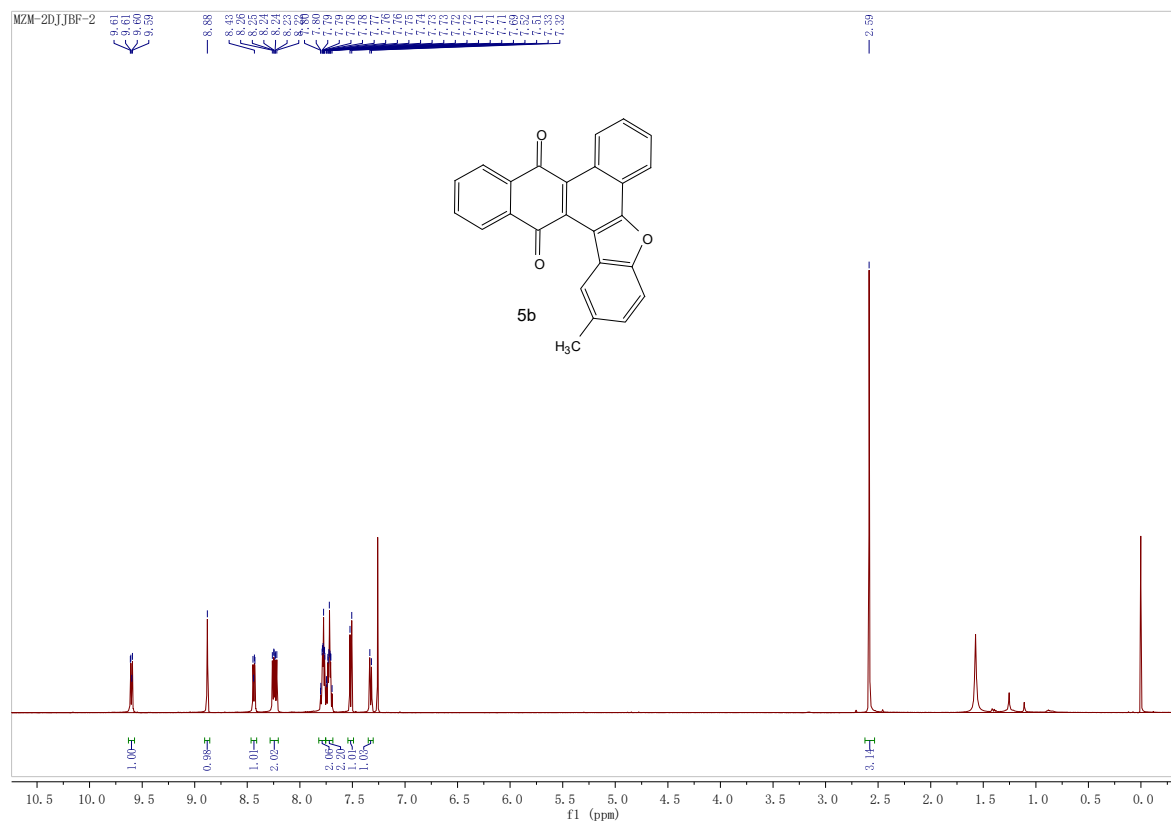



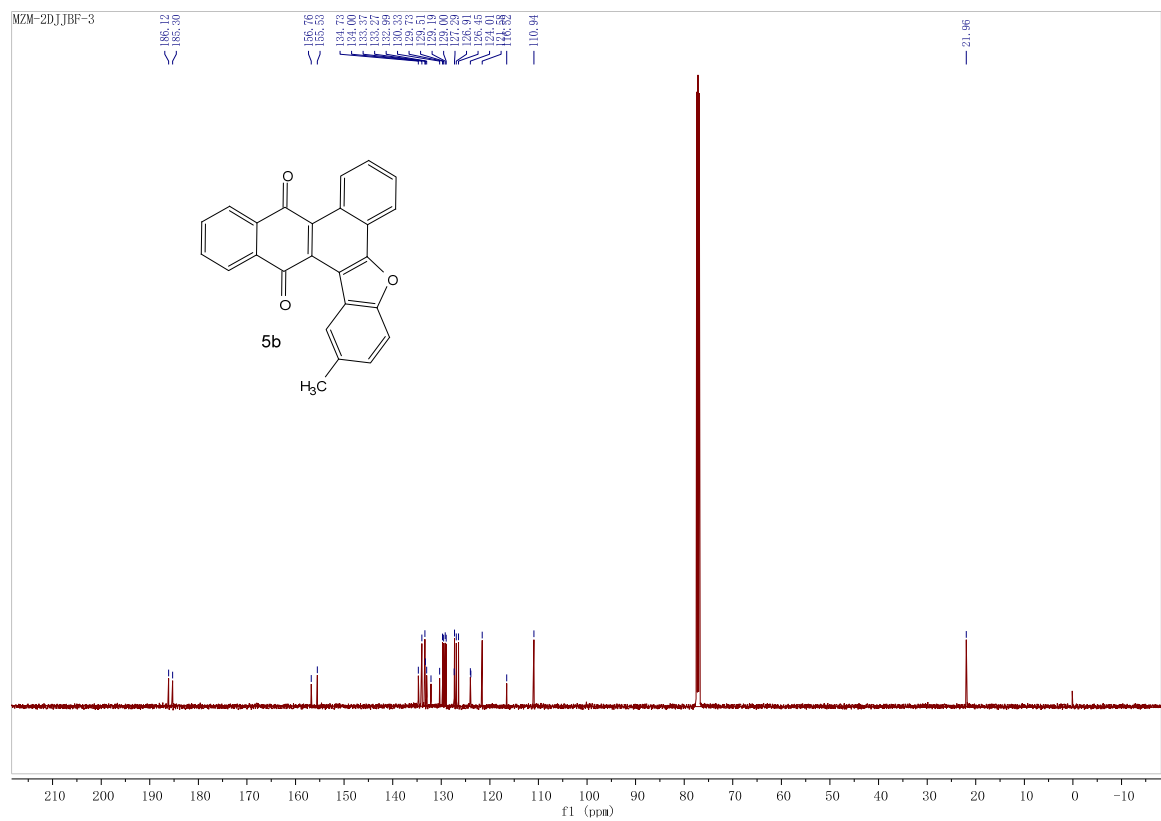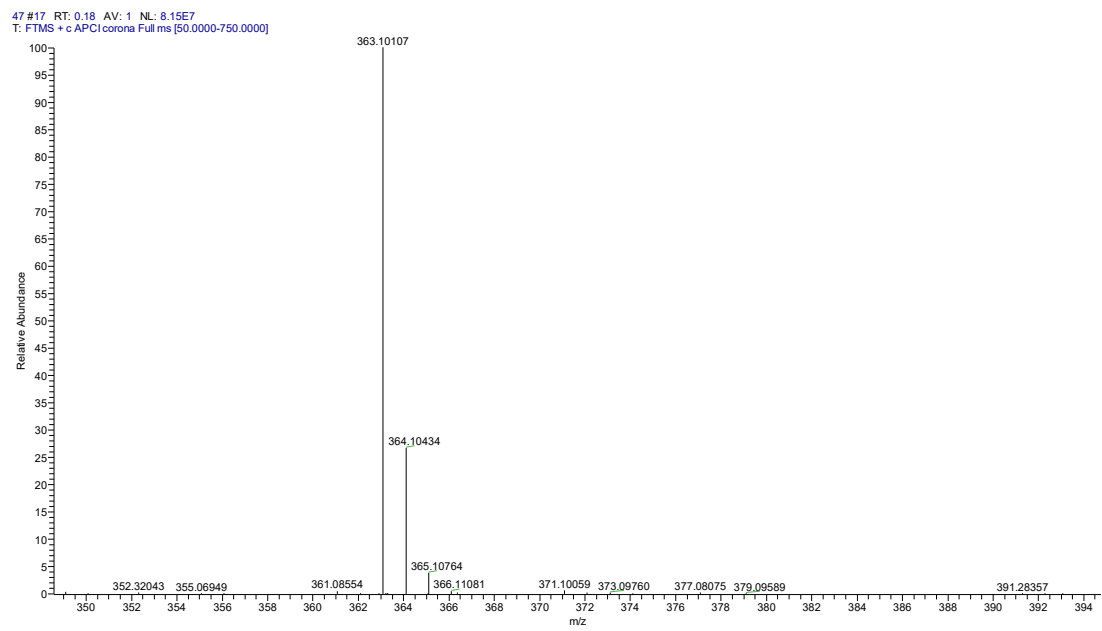

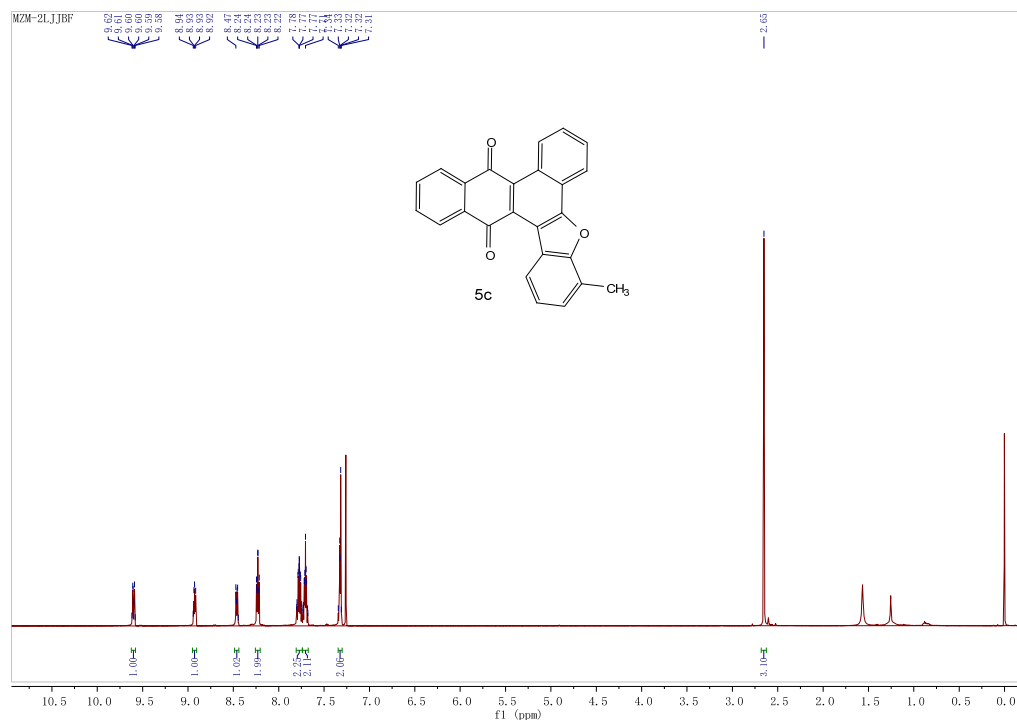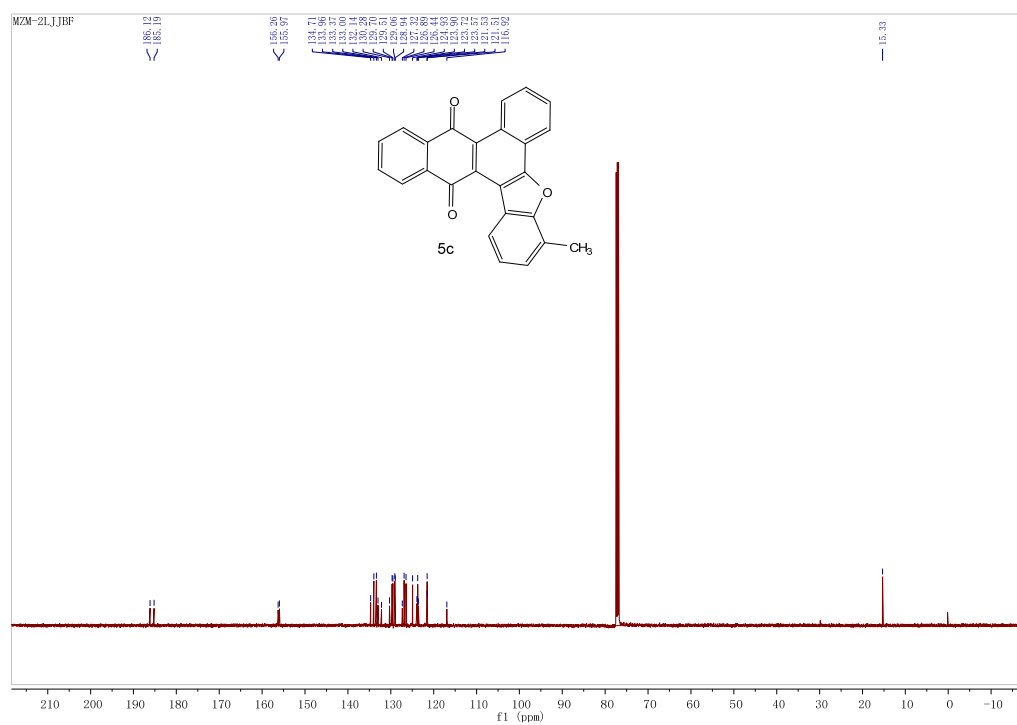

48 #15 RT: 0.17 AV: 1 NL: 5.13E7  
T: FTMS + c APCI corona Full ms [50.0000-750.0000]

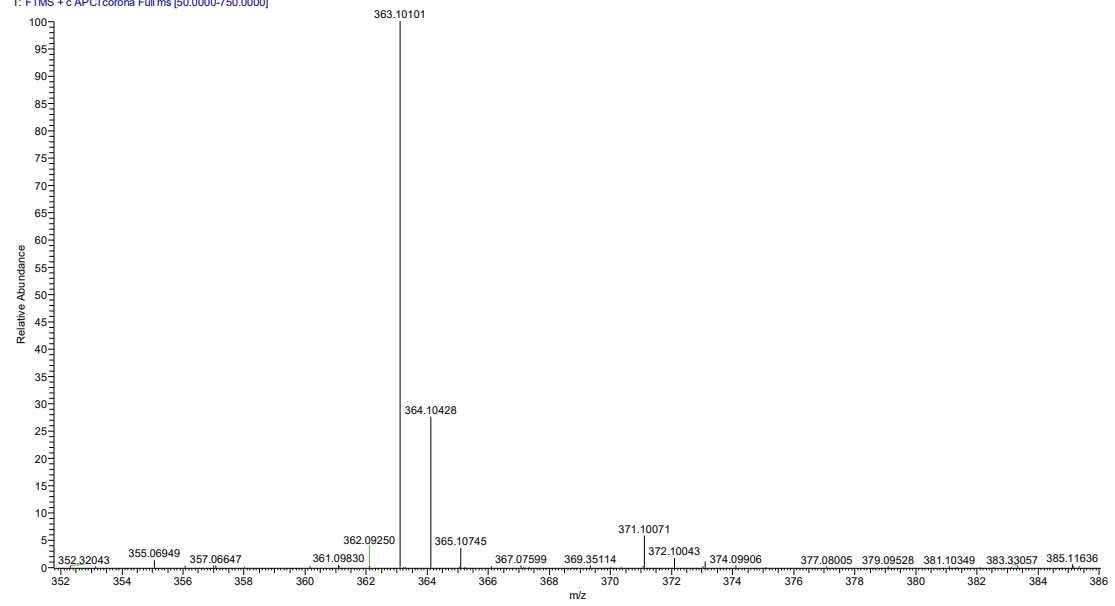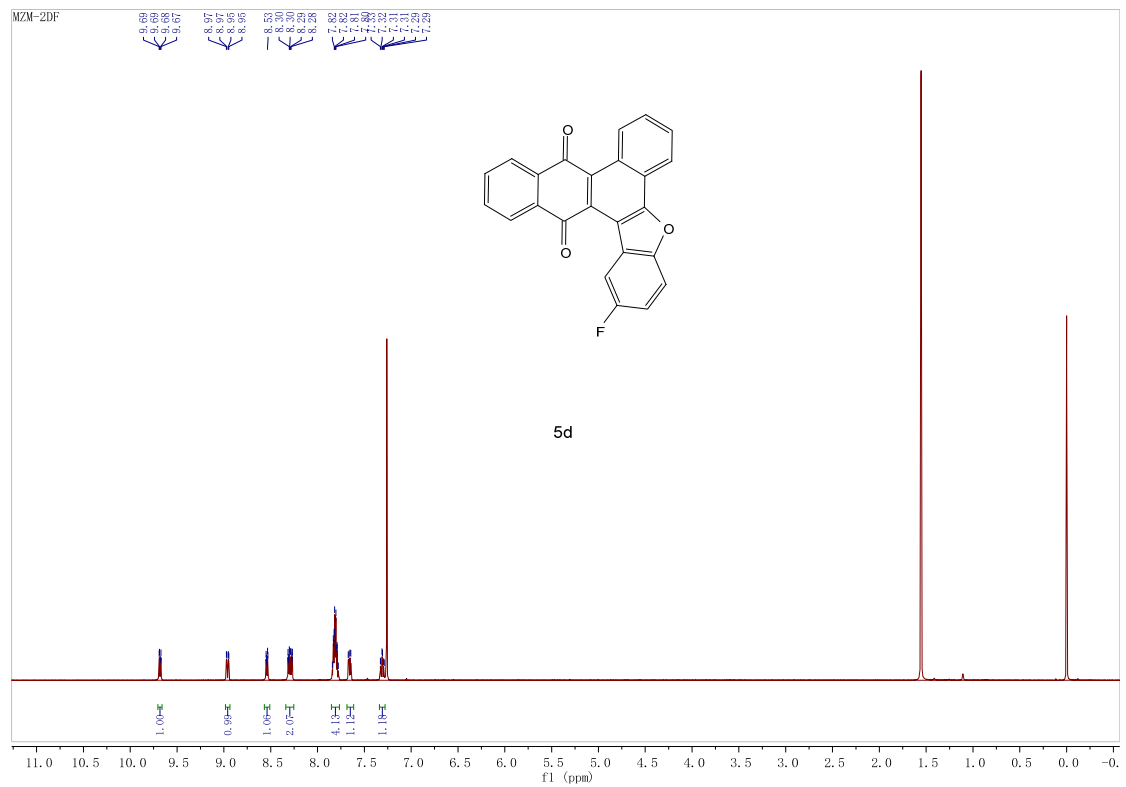

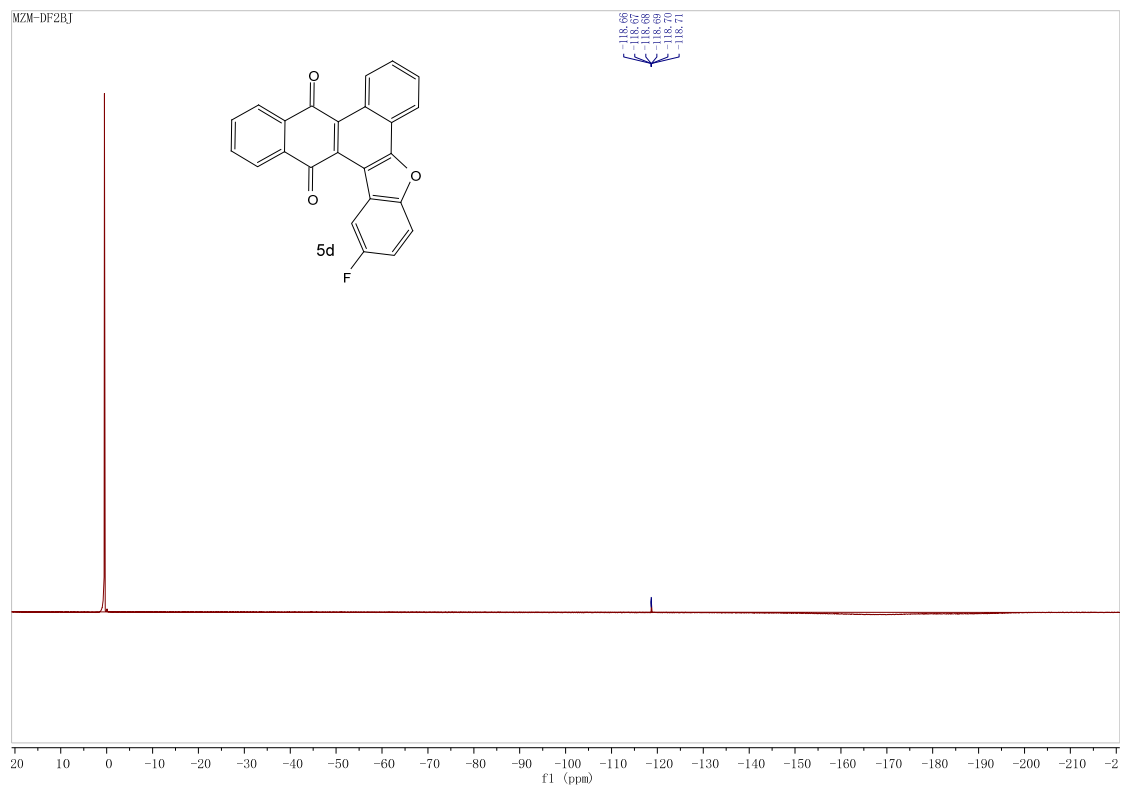

49 #17 RT: 0.19 AV: 1 NL: 7.29E6  
 T: FTMS + c.APCI corona Full ms [50.0000-750.0000]

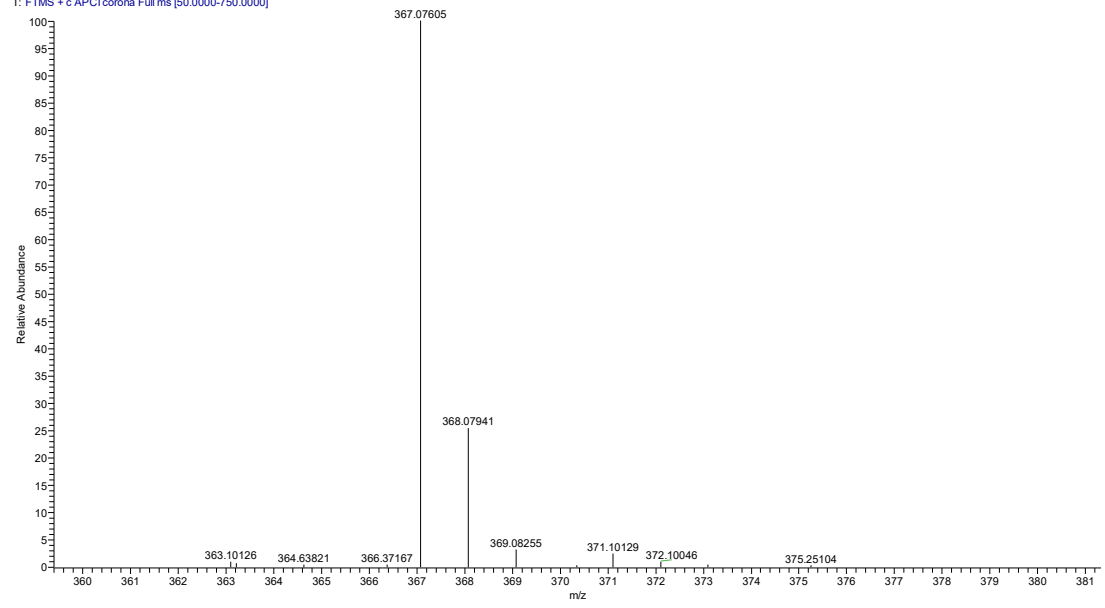

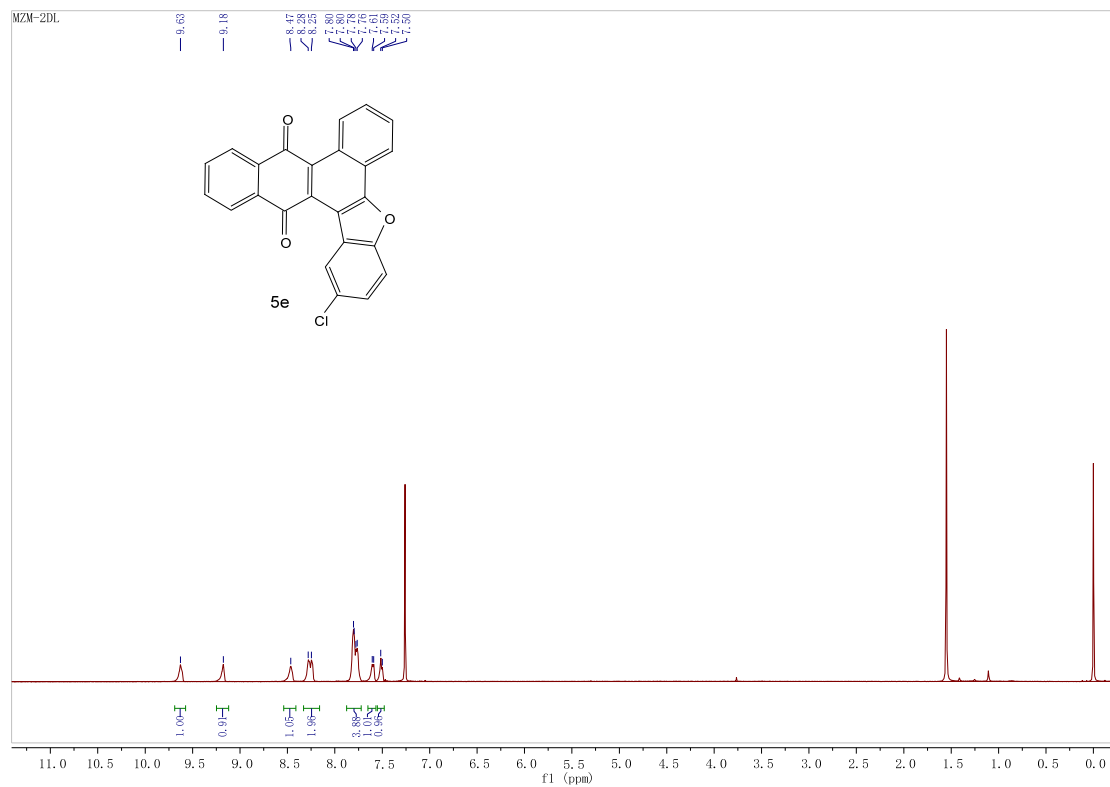

50 #15 RT: 0.17 AV: 1 NL: 2.05E6  
 T: FTMS + cAPCI corona Full ms [50.0000-750.0000]

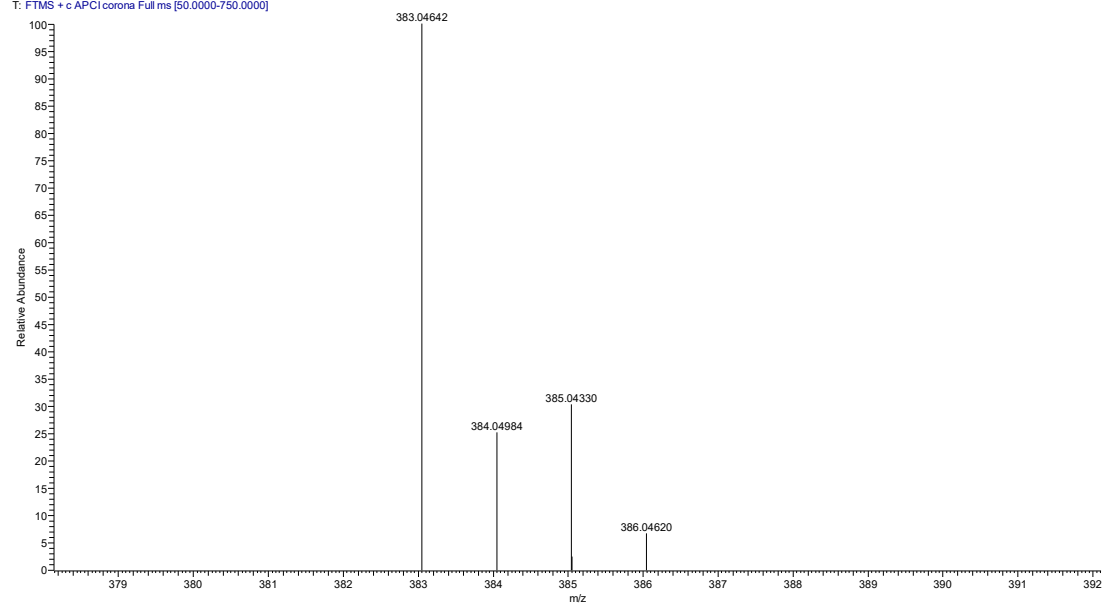



51 #17 RT: 0.18 AV: 1 NL: 1.36E7  
T: FTMS + cAPCI corona Full ms [50.0000-750.0000]

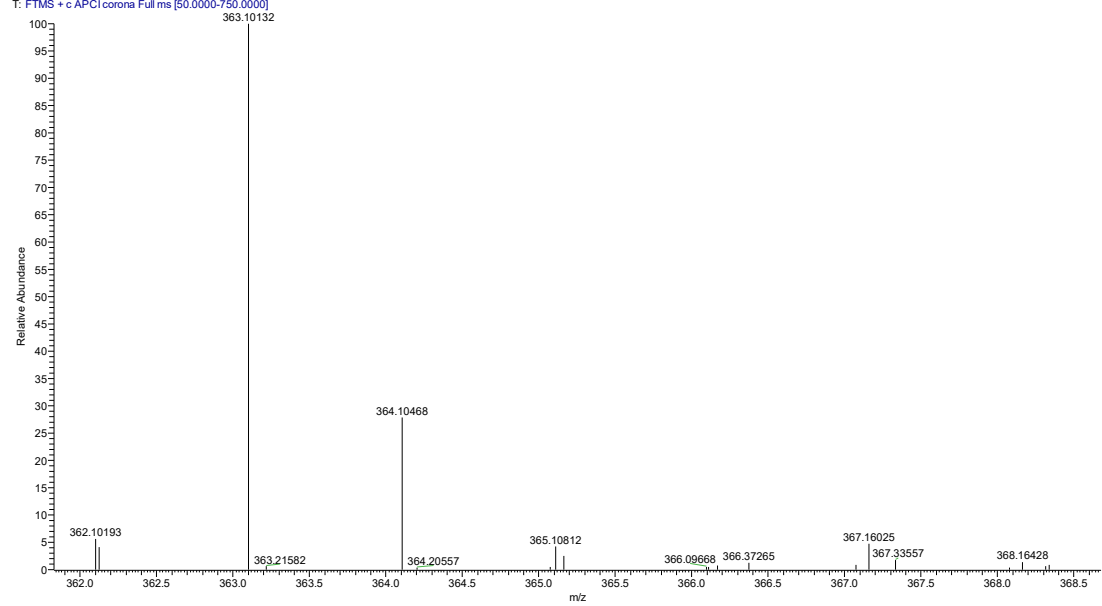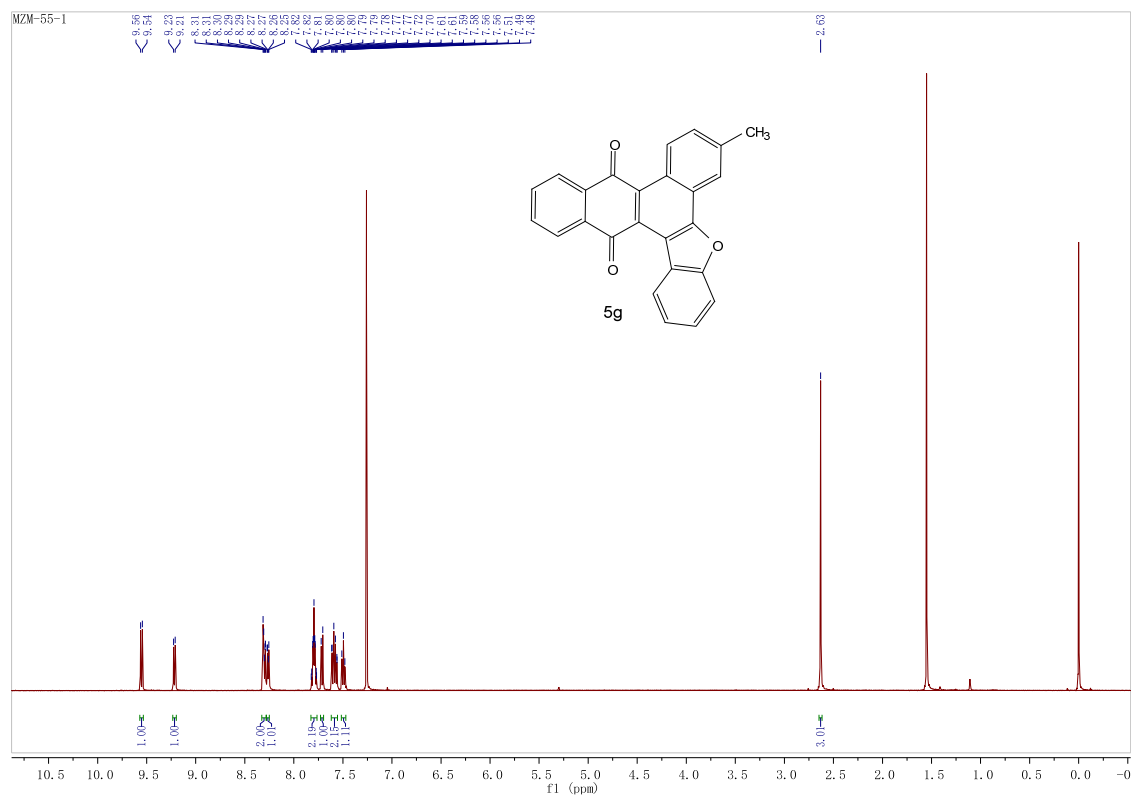

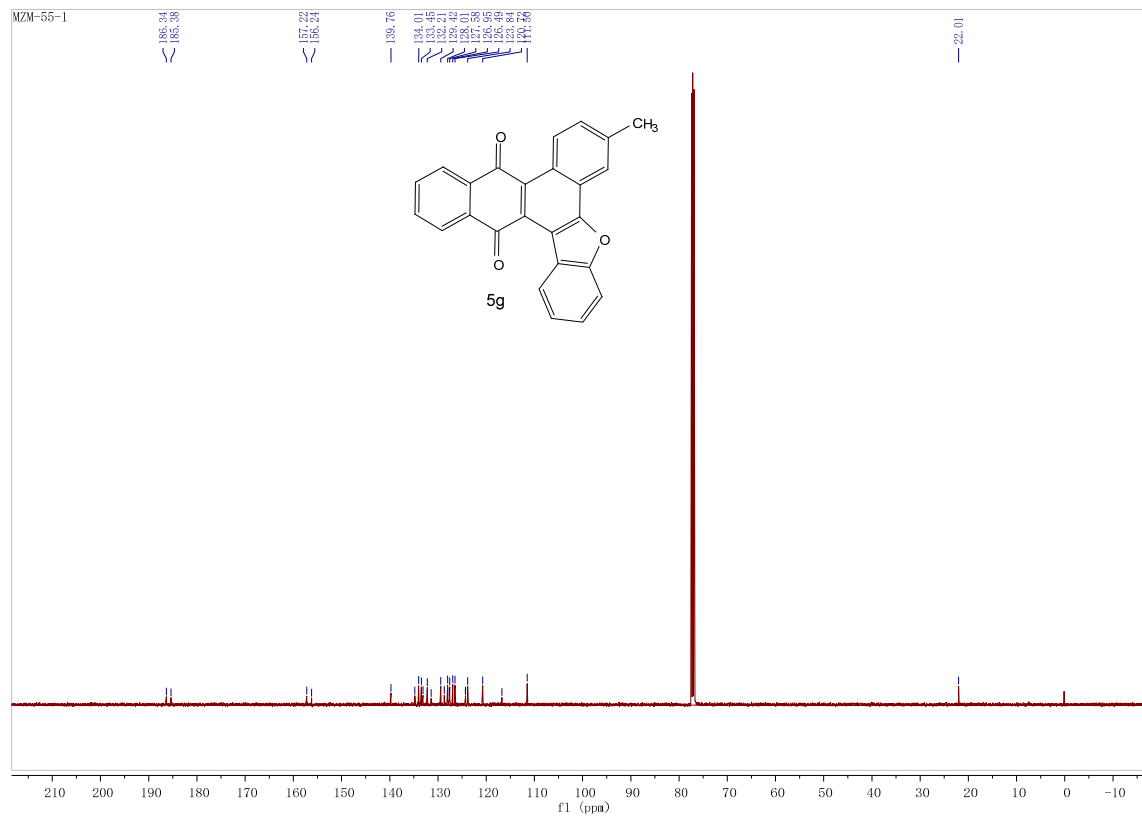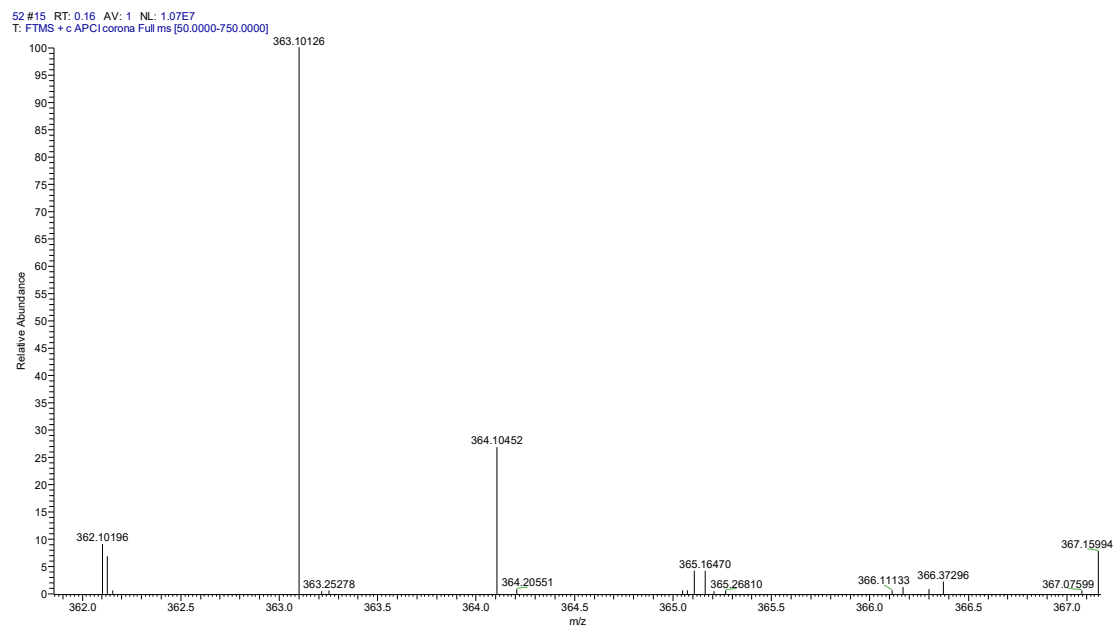



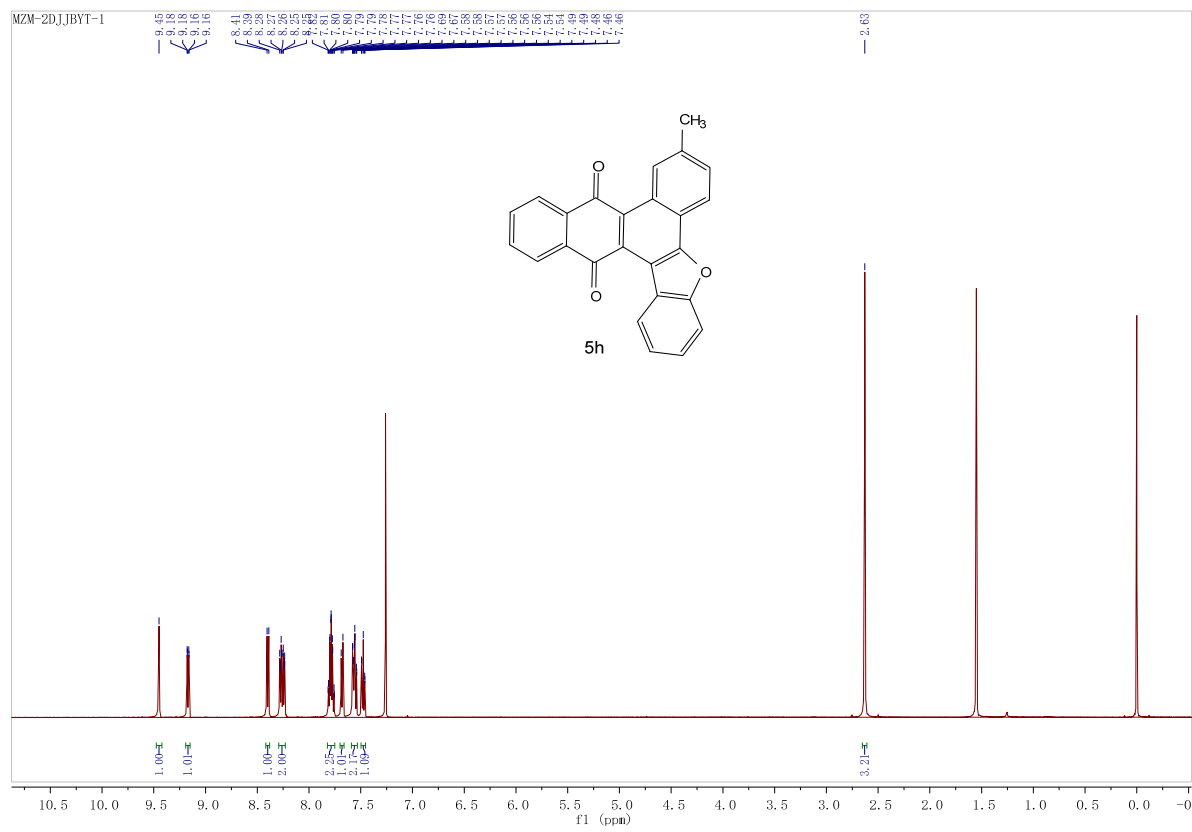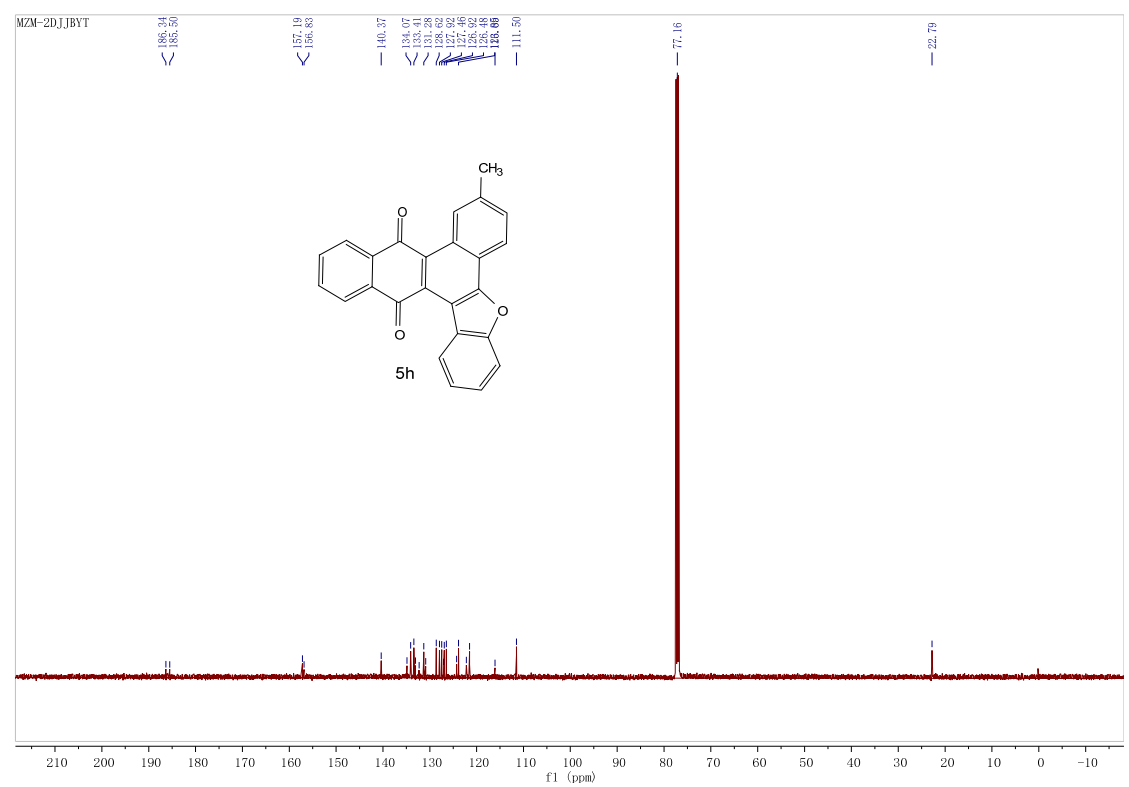

53 #17 RT: 0.19 AV: 1 NL: 1.17E7  
T: FTMS + c APCI corona Full ms [50.0000-750.0000]

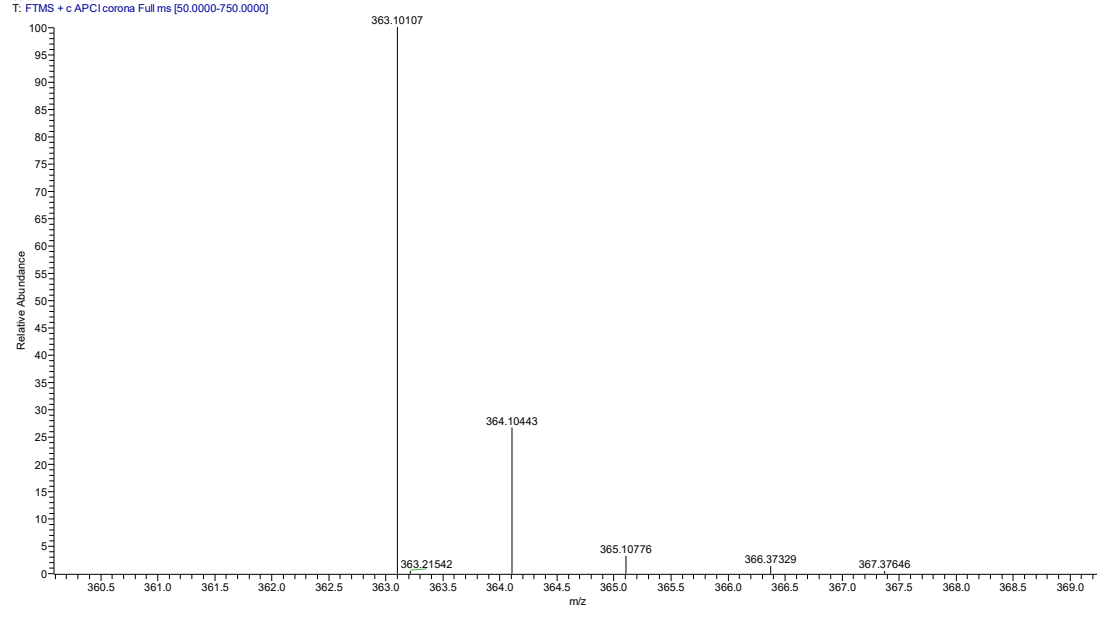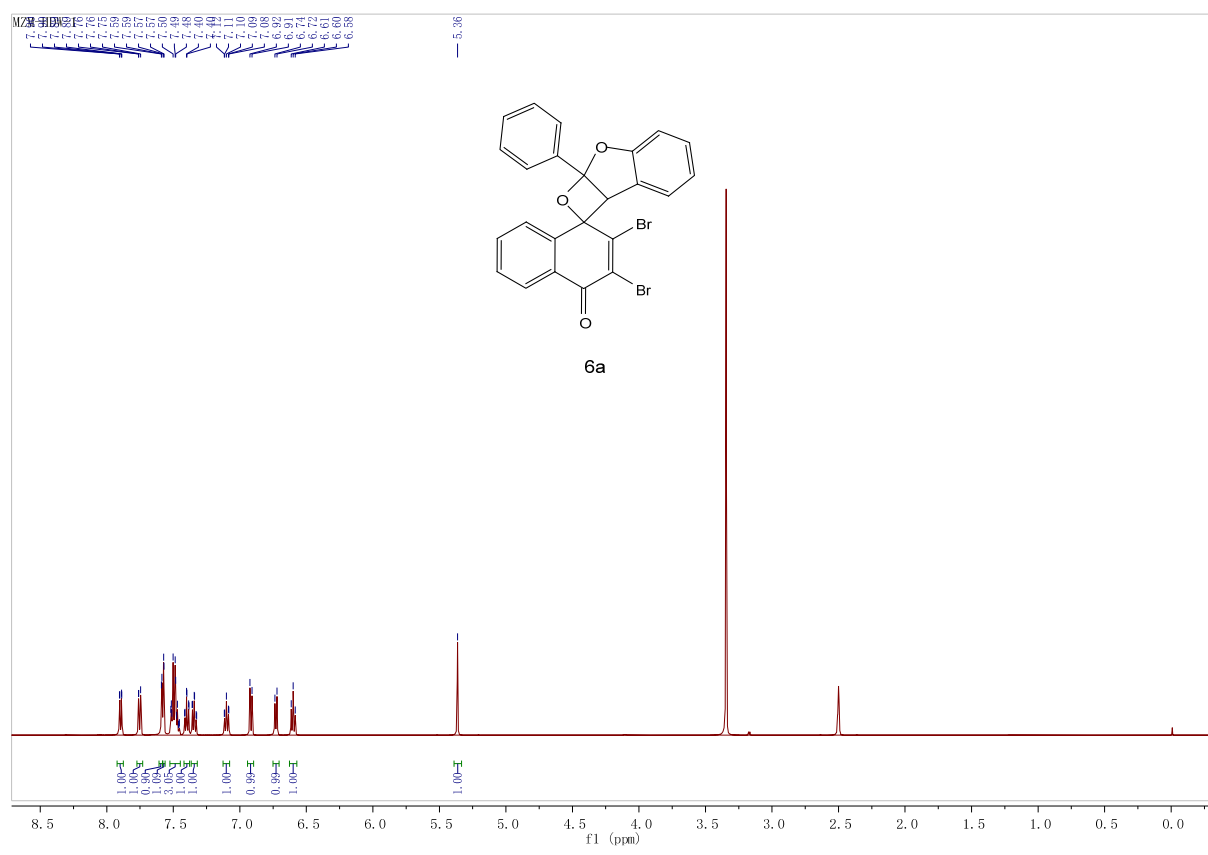

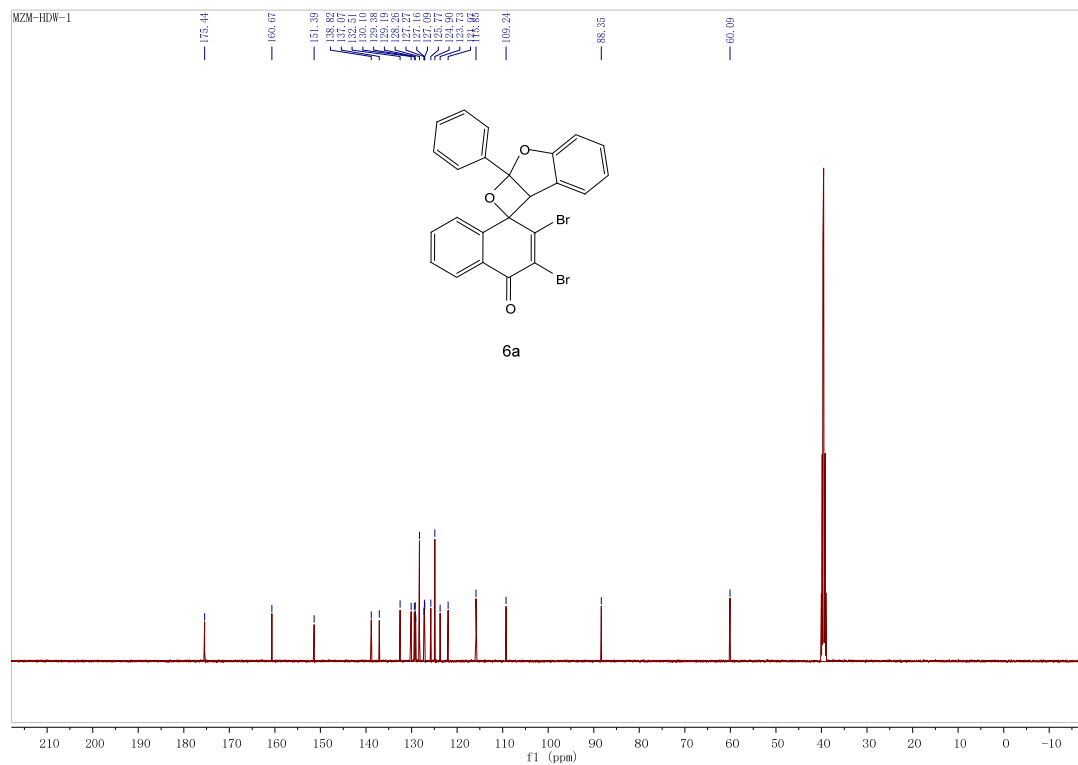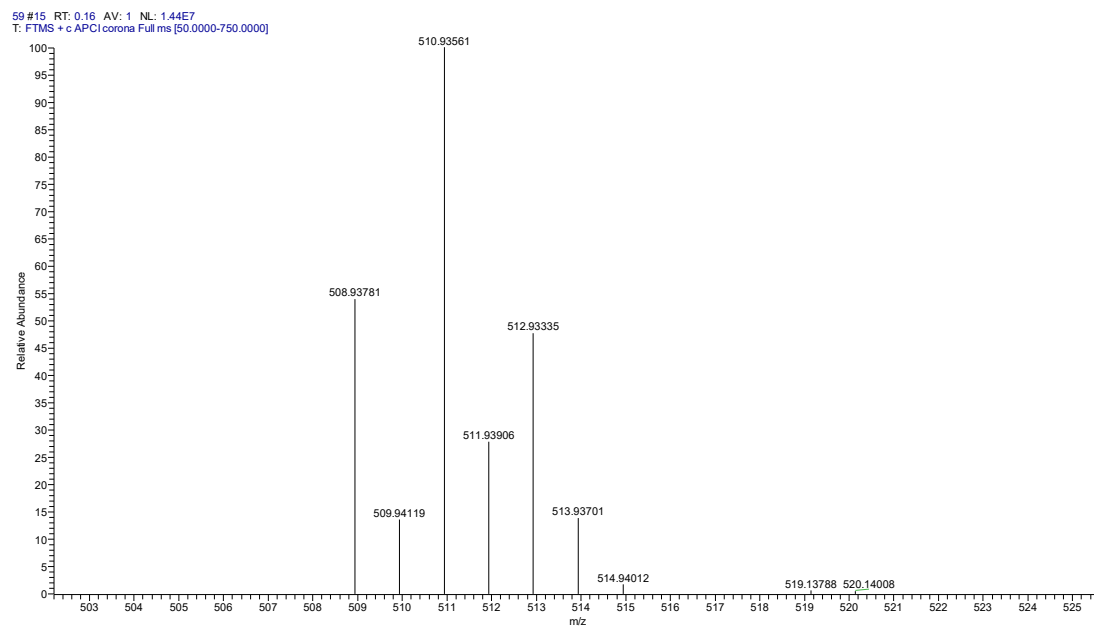

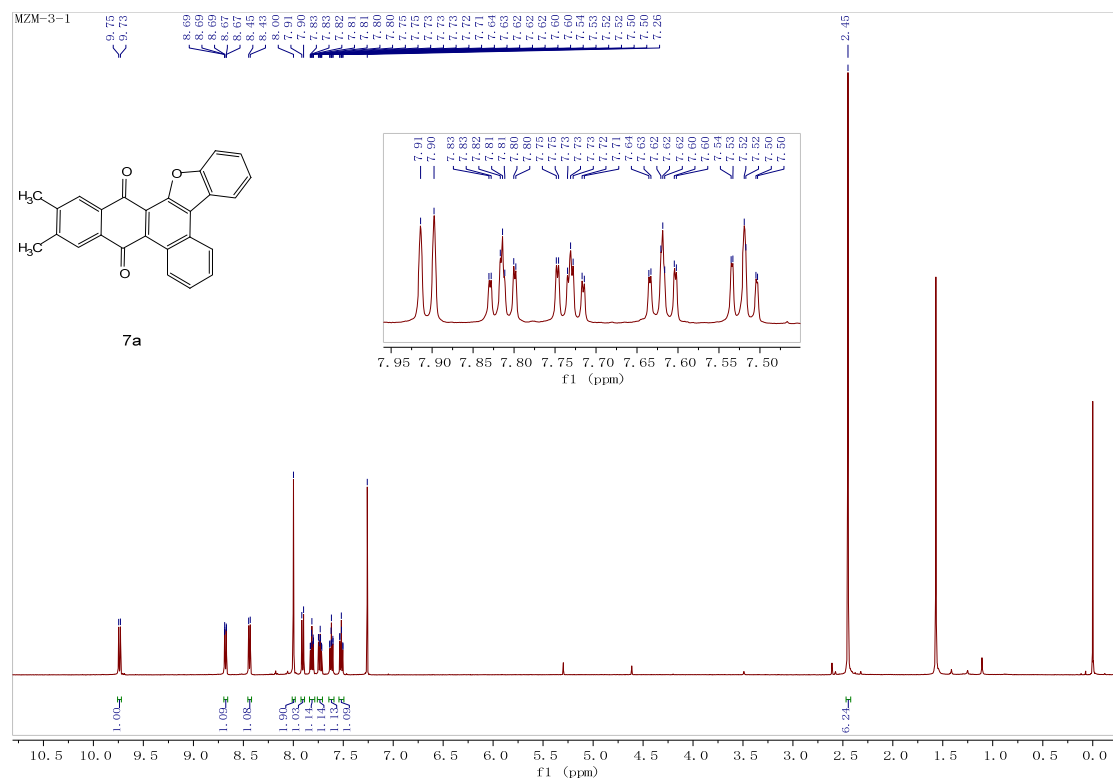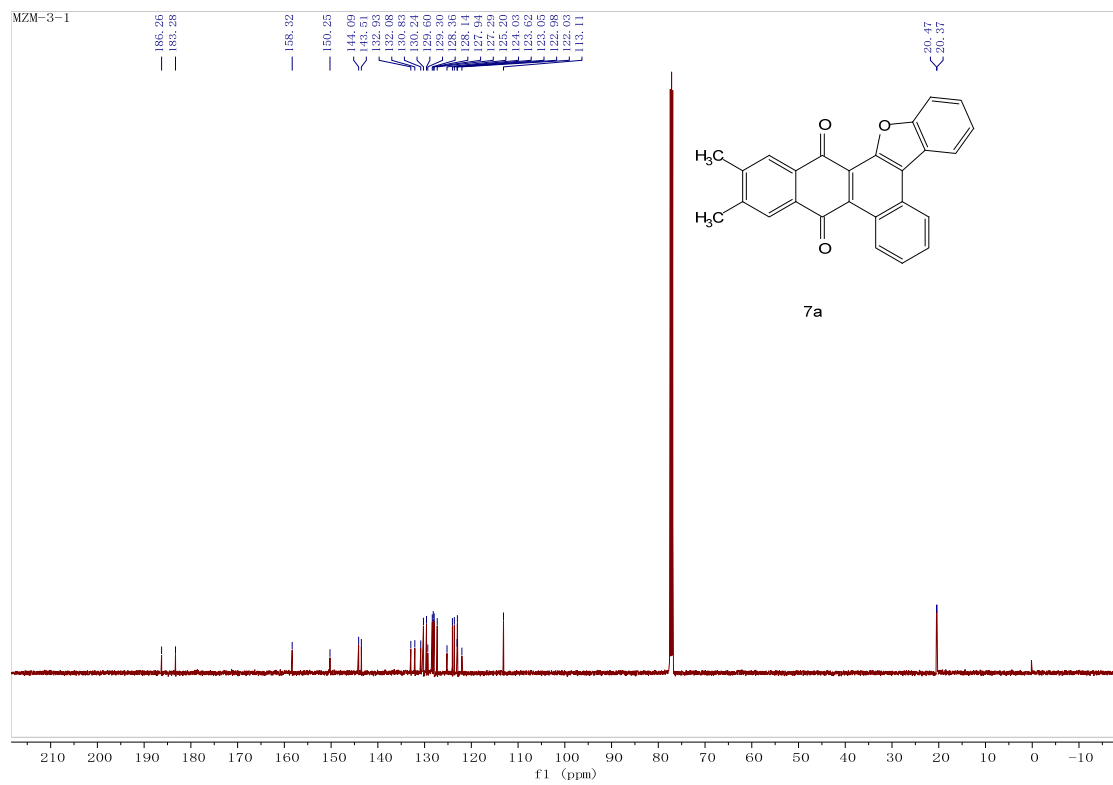

8 #15 RT: 0.16 AV: 1 NL: 1.45E8  
T: FTMS + cAPCI corona Full ms [50.0000-750.0000]

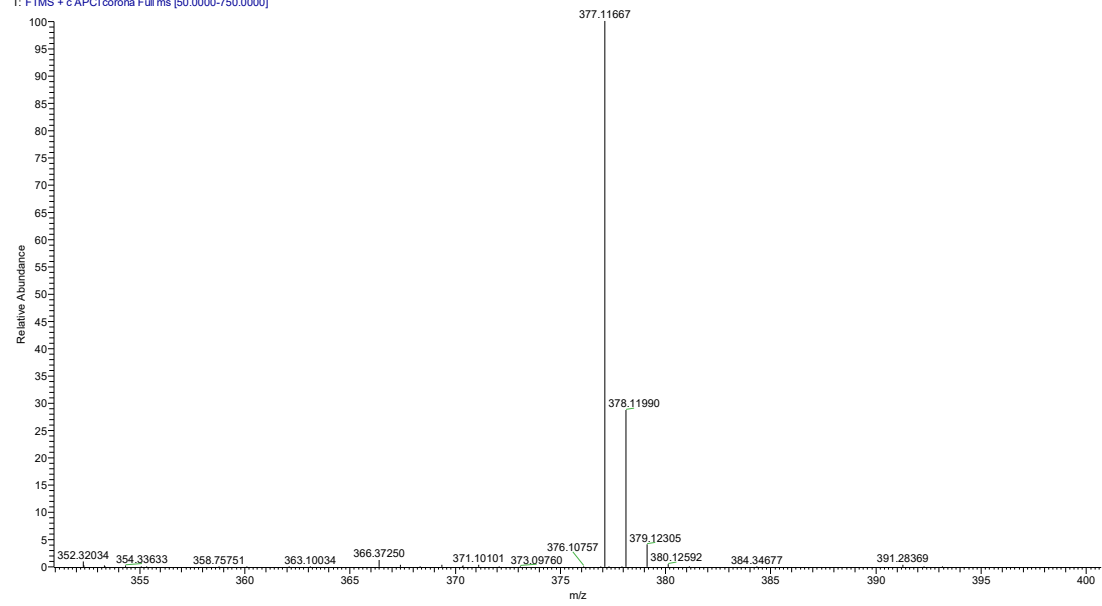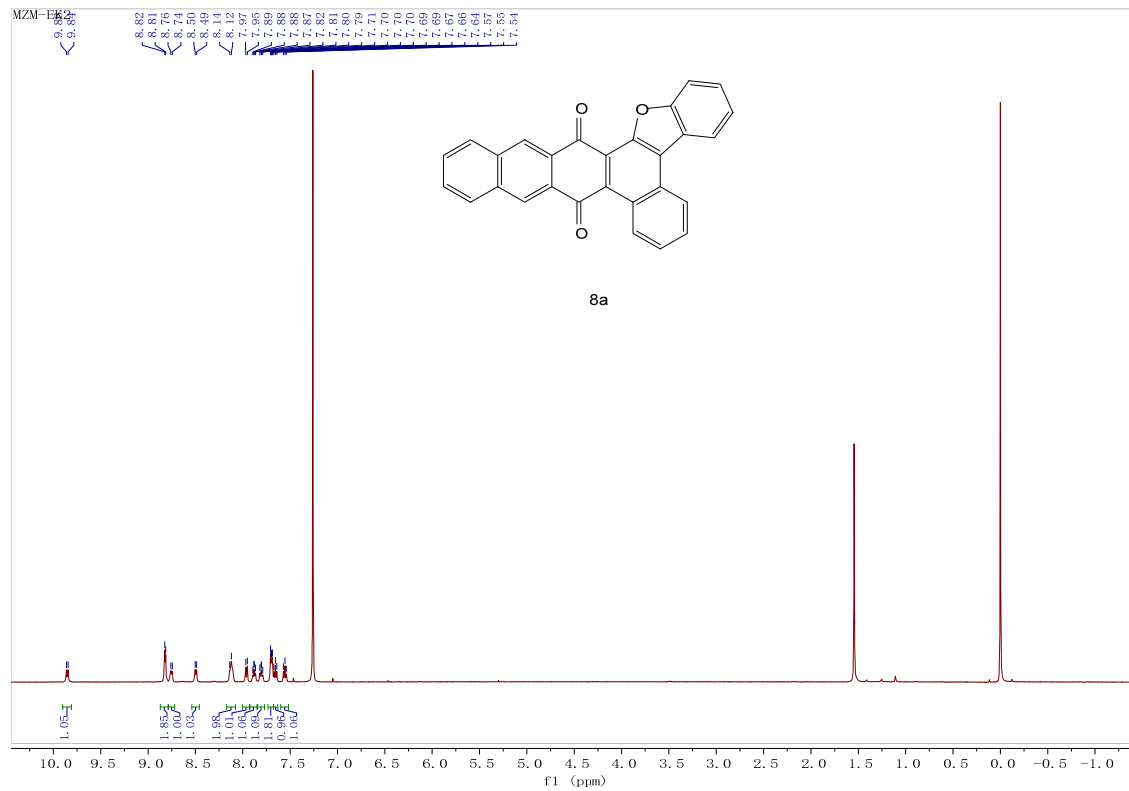

54 #17 RT: 0.19 AV: 1 NL: 1.71E7  
T: FTMS + c APCI corona Full ms [50.0000-750.0000]

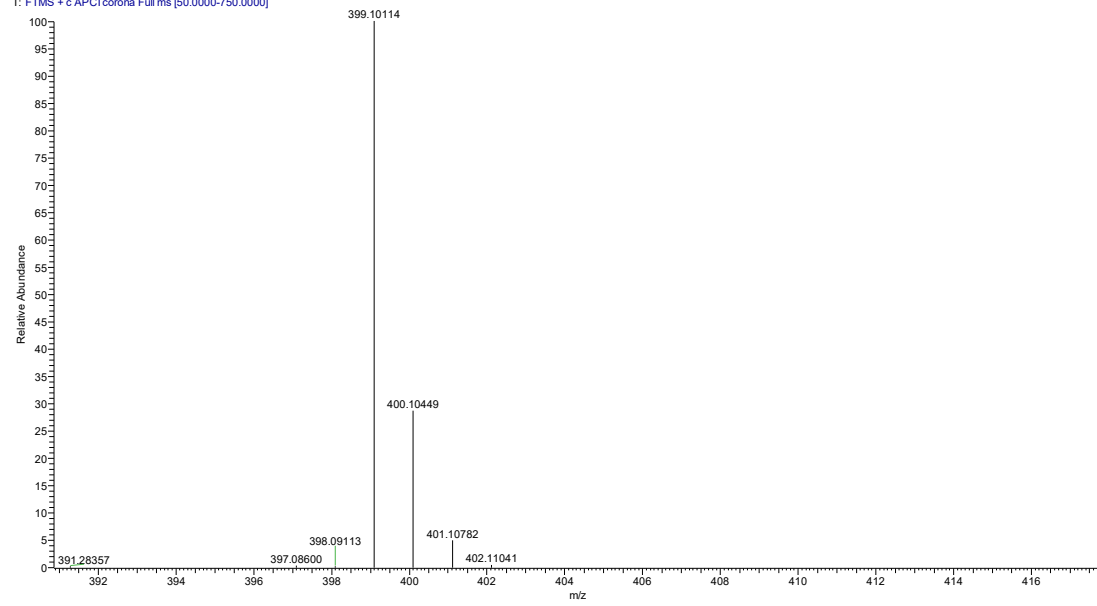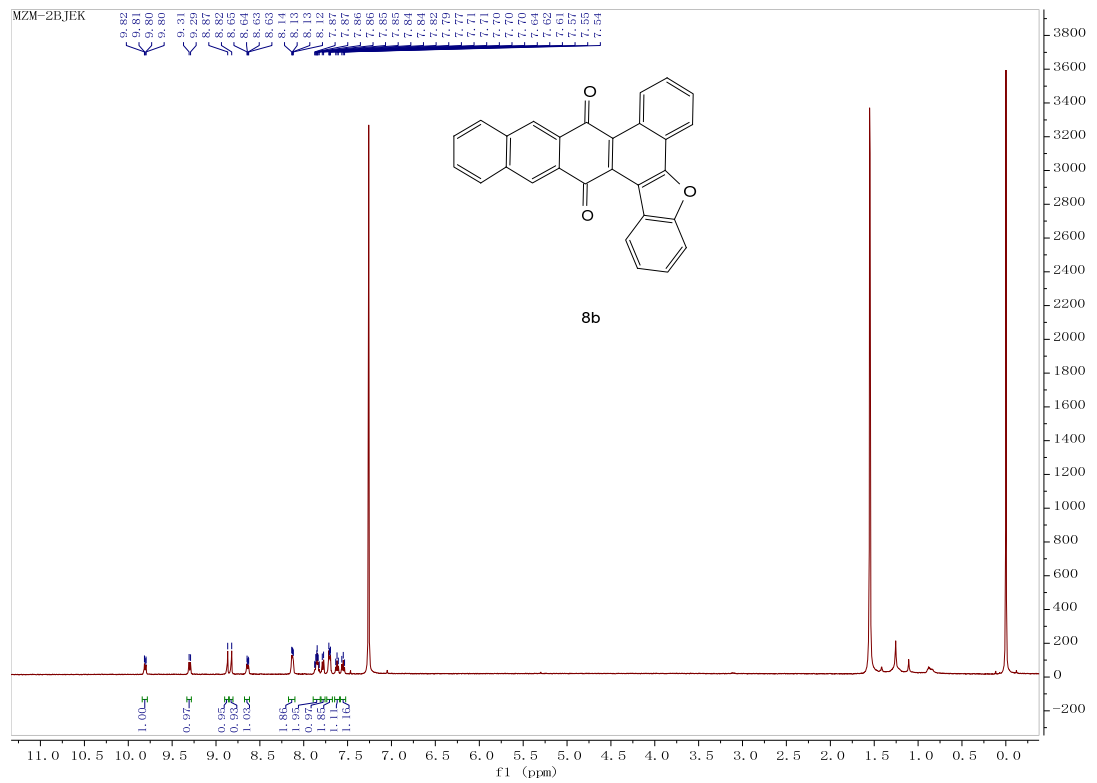

57 #15 RT: 0.17 AV: 1 NL: 8.55E6  
T: FTMS + c APCI corona Full ms [50.0000-750.0000]

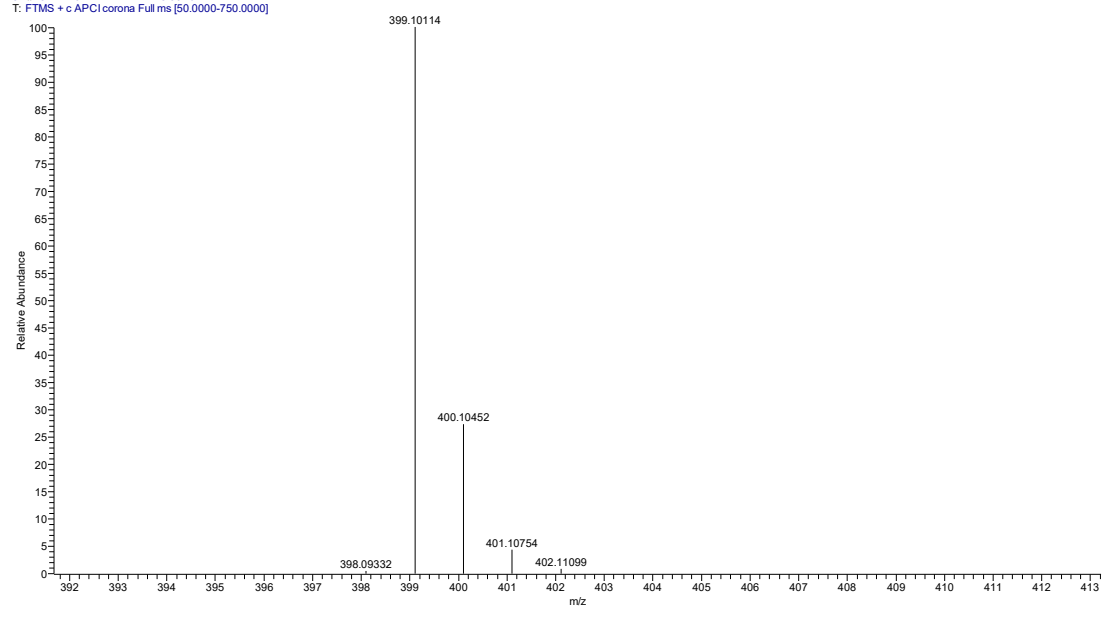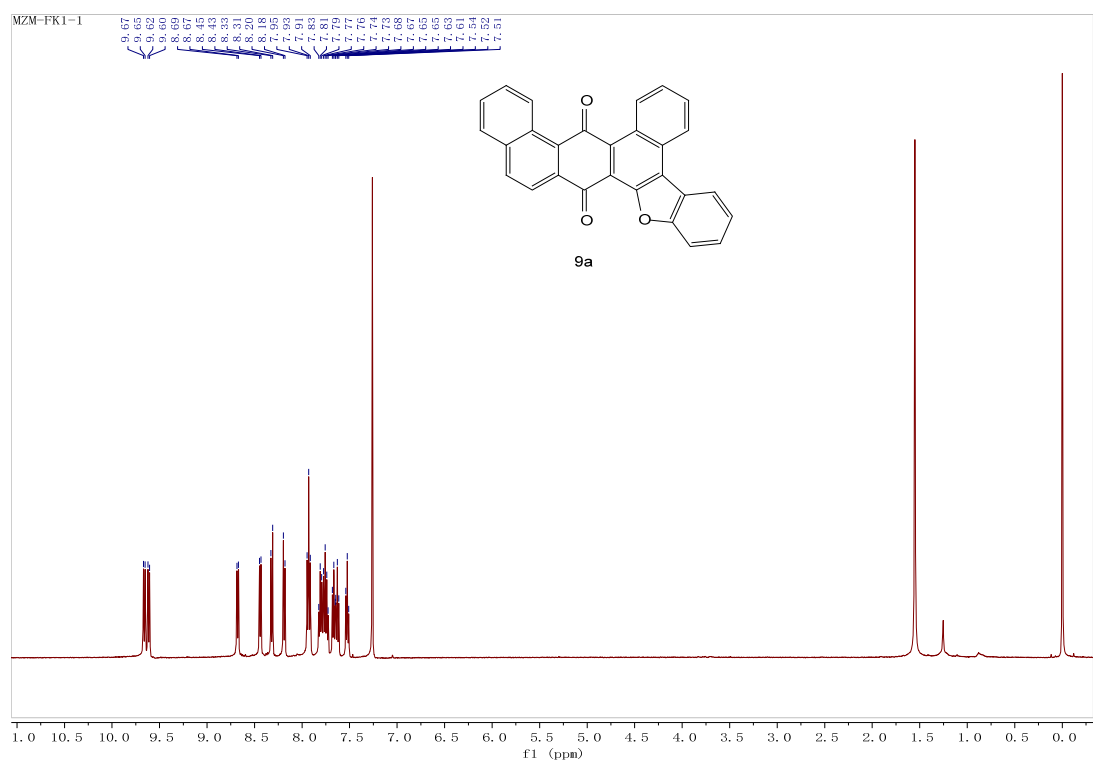

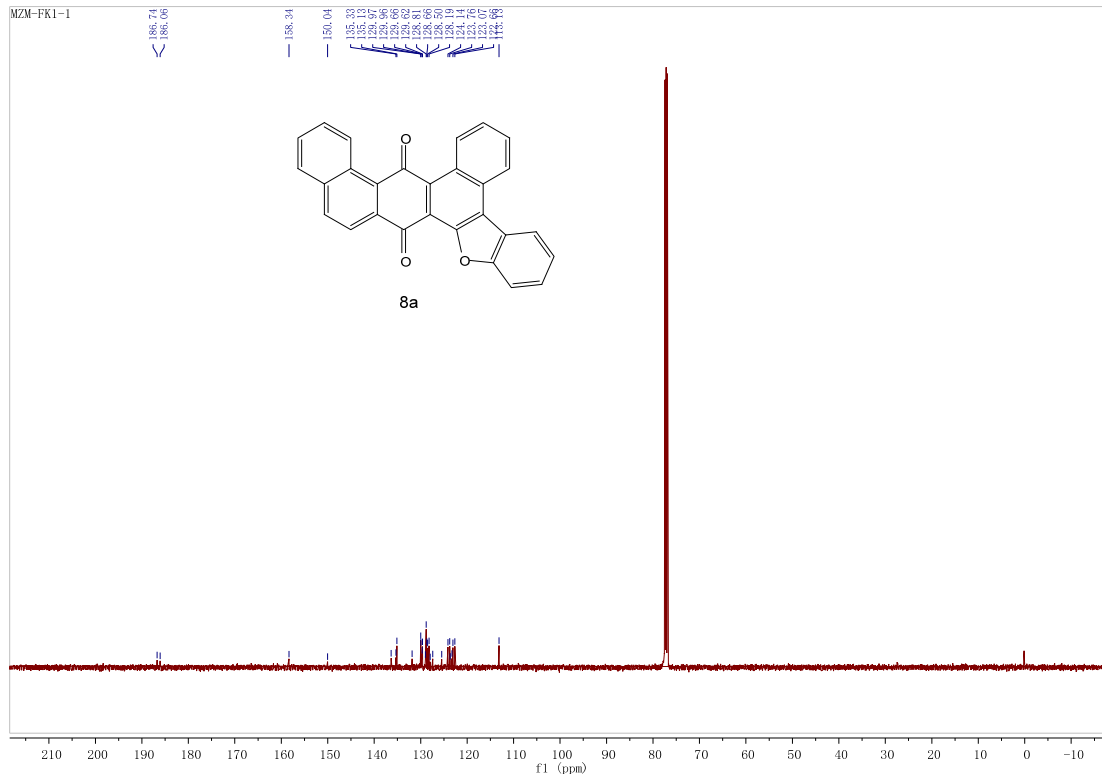

55#15 RT: 0.17 AV: 1 NL: 7.73E6  
 T: FTMS + cAPCI corona Full ms [50.0000-750.0000]

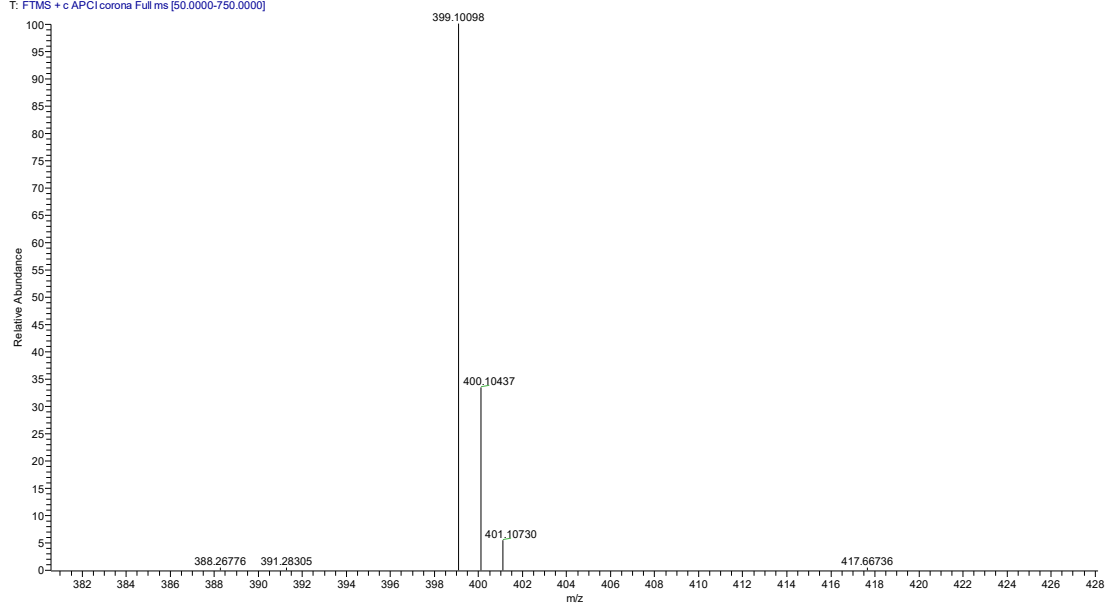



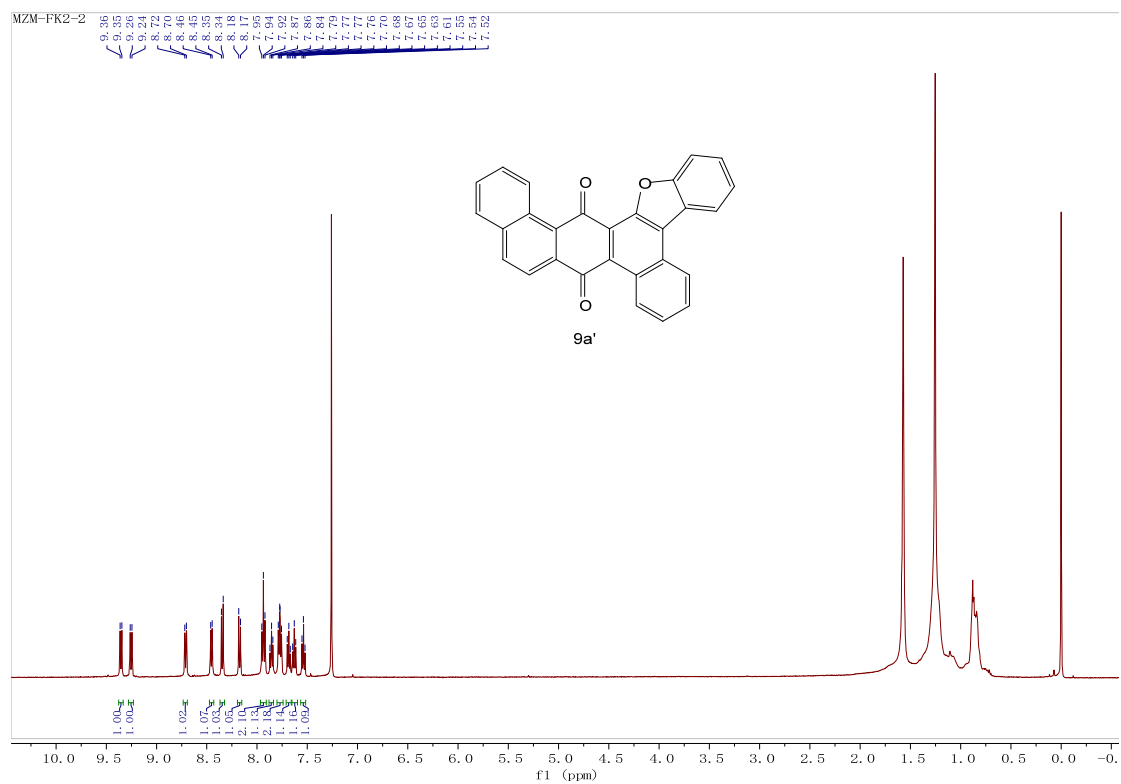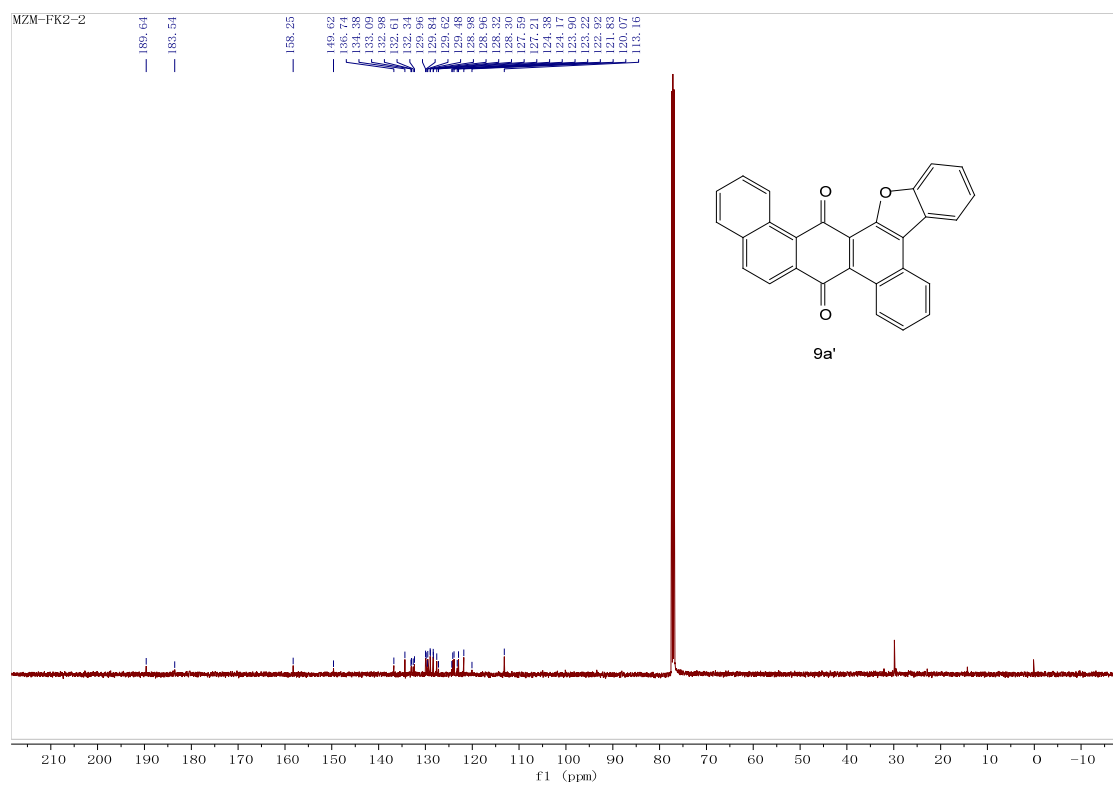

56 #19 RT: 0.21 AV: 1 NL: 7.37E6  
T: FTMS + c APCI corona Full ms [50.0000-750.0000]

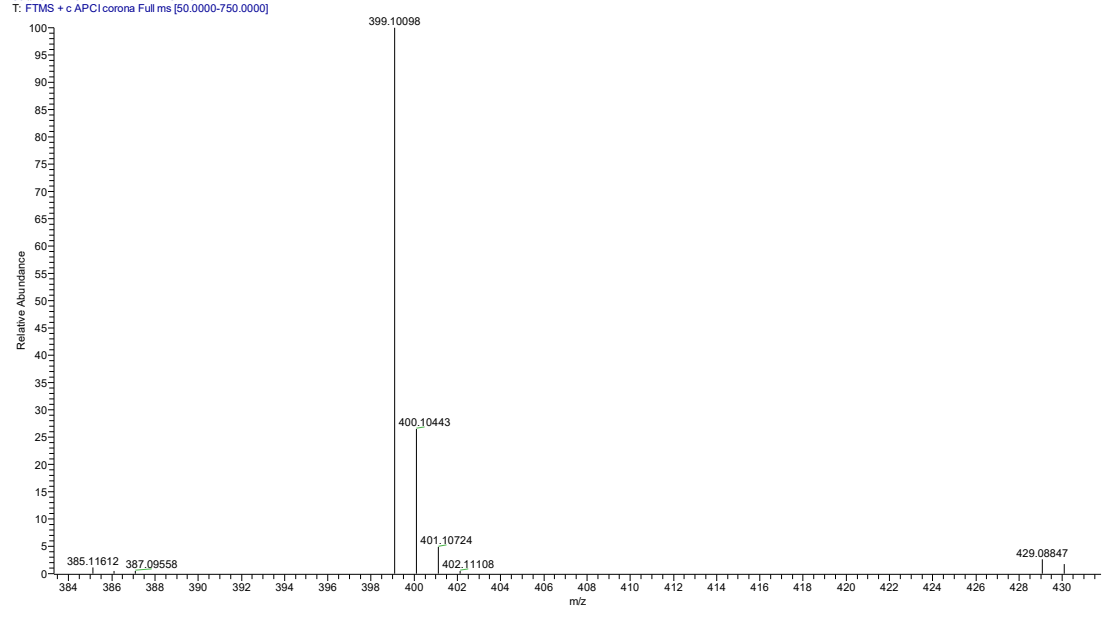

## 7. References

1. Jia, Y.; Xu, Y.; Nie, R.; Chen, F.; Zhu, Z.; Wang, J.; Jing, H., Artificial photosynthesis of methanol from carbon dioxide and water via a Nile red-embedded TiO<sub>2</sub> photocathode. *Journal of Materials Chemistry A* **2017**, *5* (11), 5495-5501.
2. da Silva Júnior, E. N.; de Carvalho, R. L.; Almeida, R. G.; Rosa, L. G.; Fantuzzi, F.; Rogge, T.; Costa, P. M. S.; Pessoa, C.; Jacob, C.; Ackermann, L., Ruthenium(II)-Catalyzed Double Annulation of Quinones: Step-Economical Access to Valuable Bioactive Compounds. *Chemistry – A European Journal* **2020**, *26* (48), 10981-10986.
3. Barranco, E.; Martín, N.; Segura, J. L.; Seoane, C.; de la Cruz, P.; Langa, F.; Gonzalez, A.; Pingarrón, J. M., Syntheses, electrochemistry and molecular modeling of N,N'-dicyanoquinonediimine (DCNQI) derivatives of substituted 1,4-anthracenediones: precursors for organic metals. *Tetrahedron* **1993**, *49* (22), 4881-4892.
4. Yang, H.-R.; Wang, J.-J.; Shao, P.-P.; Yuan, S.-Y.; Li, X.-Q., A facile three-step total synthesis of tanshinone I. *Journal of Asian Natural Products Research* **2016**, *18* (7), 677-683.
5. Dias, G. G.; Rogge, T.; Kuniyil, R.; Jacob, C.; Menna-Barreto, R. F. S.; da Silva Júnior, E. N.; Ackermann, L., Ruthenium-catalyzed C–H oxygenation of quinones by weak O-coordination for potent trypanocidal agents. *Chemical Communications* **2018**, *54* (91), 12840-12843.
6. Seymour, C. P.; Tohda, R.; Tsubaki, M.; Hayashi, M.; Matsubara, R., Photosensitization of Fluorofuroxans and Its Application to the Development of Visible Light-Triggered Nitric Oxide Donor. *J Org Chem* **2017**, *82* (18), 9647-9654.
7. Ma, Z.; Zhou, M.; Ma, L.; Zhang, M., Synthesis of benzofurans from the cyclodehydration of  $\alpha$ -phenoxy ketones mediated by Eaton's reagent. *Journal of Chemical Research* **2020**, *44* (7-8), 426-436.
8. McCall, J. M.; Romero, D. L.; Kelly, R. C. Preparation of quinoxaline-6-carboxylic acid derivatives as modulators of PAS kinase. WO2012119046A2, 2012.
